# Supplementary material for: Large-scale phylogenomic analysis resolves a backbone phylogeny in ferns
Source: PubMed Central journal article supplement (PMC5795342; doi:10.1093/gigascience/gix116), 2017-11-24
Supplement: gix116_giga-d-17-00169_original-submission.pdf [file gix116_giga-d-17-00169_original-submission.pdf]

|                                                      |                                                                                                                                                                                                                                                                                                                                                                                                                                                                                                                                                                                                                                                                                                                                                                                                                                                                                                                                                                                                                                                                                                                                                                                                                                                                                                                                                                                                                                                                                                                                                                                                                                                                                            |                        |
|------------------------------------------------------|--------------------------------------------------------------------------------------------------------------------------------------------------------------------------------------------------------------------------------------------------------------------------------------------------------------------------------------------------------------------------------------------------------------------------------------------------------------------------------------------------------------------------------------------------------------------------------------------------------------------------------------------------------------------------------------------------------------------------------------------------------------------------------------------------------------------------------------------------------------------------------------------------------------------------------------------------------------------------------------------------------------------------------------------------------------------------------------------------------------------------------------------------------------------------------------------------------------------------------------------------------------------------------------------------------------------------------------------------------------------------------------------------------------------------------------------------------------------------------------------------------------------------------------------------------------------------------------------------------------------------------------------------------------------------------------------|------------------------|
| <b>Manuscript Number:</b>                            | GIGA-D-17-00169                                                                                                                                                                                                                                                                                                                                                                                                                                                                                                                                                                                                                                                                                                                                                                                                                                                                                                                                                                                                                                                                                                                                                                                                                                                                                                                                                                                                                                                                                                                                                                                                                                                                            |                        |
| <b>Full Title:</b>                                   | Large scale phylogenomic analysis resolves a backbone phylogeny in ferns                                                                                                                                                                                                                                                                                                                                                                                                                                                                                                                                                                                                                                                                                                                                                                                                                                                                                                                                                                                                                                                                                                                                                                                                                                                                                                                                                                                                                                                                                                                                                                                                                   |                        |
| <b>Article Type:</b>                                 | Research                                                                                                                                                                                                                                                                                                                                                                                                                                                                                                                                                                                                                                                                                                                                                                                                                                                                                                                                                                                                                                                                                                                                                                                                                                                                                                                                                                                                                                                                                                                                                                                                                                                                                   |                        |
| <b>Funding Information:</b>                          | Shanghai Landscaping & City Appearance Administrative Bureau of China (F132421)                                                                                                                                                                                                                                                                                                                                                                                                                                                                                                                                                                                                                                                                                                                                                                                                                                                                                                                                                                                                                                                                                                                                                                                                                                                                                                                                                                                                                                                                                                                                                                                                            | Proffesor Yue-Hong Yan |
|                                                      | Shanghai Landscaping & City Appearance Administrative Bureau of China (F112422)                                                                                                                                                                                                                                                                                                                                                                                                                                                                                                                                                                                                                                                                                                                                                                                                                                                                                                                                                                                                                                                                                                                                                                                                                                                                                                                                                                                                                                                                                                                                                                                                            | Proffesor Yue-Hong Yan |
|                                                      | National Natural Science Foundation of China (31370234)                                                                                                                                                                                                                                                                                                                                                                                                                                                                                                                                                                                                                                                                                                                                                                                                                                                                                                                                                                                                                                                                                                                                                                                                                                                                                                                                                                                                                                                                                                                                                                                                                                    | Proffesor Yue-Hong Yan |
| <b>Abstract:</b>                                     | <p>Background: Ferns originated about 360 million years ago is the sister group of seed plants. Despite remarkable progress in our understanding of fern phylogeny, with conflicting molecular evidences and different morphological interpretations, relationships among major fern lineages remain controversial.</p> <p>Results: With the aim to obtain a robust fern phylogeny, we carried large scale phylogenomic analysis using high-quality transcriptome sequencing data which covered 69 fern species from 38 families and 11 orders. Both coalescent-based and concatenation-based methods were applied to both nucleotides and amino acids sequences in species tree estimation. Among the mainly consistent and strongly supported cladograms, coalescent-based method using nucleotides sequence yielded the most robust cladogram.</p> <p>Conclusions: Our result confirmed that Equisetales is sister to the rest of ferns, and Dennstaedtiaceae is sister to eupolypods. Moreover, our result strongly supported some relationships new to the current view of fern phylogeny, including that Psilotaceae and Ophioglossaceae form a monophyletic clade which is sister to Marattiaceae; Gleicheniaceae and Hymenophyllaceae form a monophyletic clade which is sister to Dipteridaceae; and that Aspleniaceae is sister to the rest groups in eupolypods II. These results were interpreted with morphological traits, especially sporangia characters, and a new evolutionary route of sporangia annulus in ferns was suggested. This backbone phylogeny in ferns sets a foundation for further studies in biology and evolution in ferns, and therefore in plants.</p> |                        |
| <b>Corresponding Author:</b>                         | Yue-Hong Yan, Ph.D<br>Shanghai Chenshan Botanical Garden<br>Shanghai, CHINA                                                                                                                                                                                                                                                                                                                                                                                                                                                                                                                                                                                                                                                                                                                                                                                                                                                                                                                                                                                                                                                                                                                                                                                                                                                                                                                                                                                                                                                                                                                                                                                                                |                        |
| <b>Corresponding Author Secondary Information:</b>   |                                                                                                                                                                                                                                                                                                                                                                                                                                                                                                                                                                                                                                                                                                                                                                                                                                                                                                                                                                                                                                                                                                                                                                                                                                                                                                                                                                                                                                                                                                                                                                                                                                                                                            |                        |
| <b>Corresponding Author's Institution:</b>           | Shanghai Chenshan Botanical Garden                                                                                                                                                                                                                                                                                                                                                                                                                                                                                                                                                                                                                                                                                                                                                                                                                                                                                                                                                                                                                                                                                                                                                                                                                                                                                                                                                                                                                                                                                                                                                                                                                                                         |                        |
| <b>Corresponding Author's Secondary Institution:</b> |                                                                                                                                                                                                                                                                                                                                                                                                                                                                                                                                                                                                                                                                                                                                                                                                                                                                                                                                                                                                                                                                                                                                                                                                                                                                                                                                                                                                                                                                                                                                                                                                                                                                                            |                        |
| <b>First Author:</b>                                 | Hui Shen, PhD                                                                                                                                                                                                                                                                                                                                                                                                                                                                                                                                                                                                                                                                                                                                                                                                                                                                                                                                                                                                                                                                                                                                                                                                                                                                                                                                                                                                                                                                                                                                                                                                                                                                              |                        |
| <b>First Author Secondary Information:</b>           |                                                                                                                                                                                                                                                                                                                                                                                                                                                                                                                                                                                                                                                                                                                                                                                                                                                                                                                                                                                                                                                                                                                                                                                                                                                                                                                                                                                                                                                                                                                                                                                                                                                                                            |                        |
| <b>Order of Authors:</b>                             | Hui Shen, PhD                                                                                                                                                                                                                                                                                                                                                                                                                                                                                                                                                                                                                                                                                                                                                                                                                                                                                                                                                                                                                                                                                                                                                                                                                                                                                                                                                                                                                                                                                                                                                                                                                                                                              |                        |
|                                                      | Dongmei Jin, PhD                                                                                                                                                                                                                                                                                                                                                                                                                                                                                                                                                                                                                                                                                                                                                                                                                                                                                                                                                                                                                                                                                                                                                                                                                                                                                                                                                                                                                                                                                                                                                                                                                                                                           |                        |
|                                                      | Jiang-Ping Shu                                                                                                                                                                                                                                                                                                                                                                                                                                                                                                                                                                                                                                                                                                                                                                                                                                                                                                                                                                                                                                                                                                                                                                                                                                                                                                                                                                                                                                                                                                                                                                                                                                                                             |                        |
|                                                      | Xi-Le Zhou                                                                                                                                                                                                                                                                                                                                                                                                                                                                                                                                                                                                                                                                                                                                                                                                                                                                                                                                                                                                                                                                                                                                                                                                                                                                                                                                                                                                                                                                                                                                                                                                                                                                                 |                        |
|                                                      | Ming Lei, PhD                                                                                                                                                                                                                                                                                                                                                                                                                                                                                                                                                                                                                                                                                                                                                                                                                                                                                                                                                                                                                                                                                                                                                                                                                                                                                                                                                                                                                                                                                                                                                                                                                                                                              |                        |
|                                                      | Ran Wei, PhD                                                                                                                                                                                                                                                                                                                                                                                                                                                                                                                                                                                                                                                                                                                                                                                                                                                                                                                                                                                                                                                                                                                                                                                                                                                                                                                                                                                                                                                                                                                                                                                                                                                                               |                        |
|                                                      |                                                                                                                                                                                                                                                                                                                                                                                                                                                                                                                                                                                                                                                                                                                                                                                                                                                                                                                                                                                                                                                                                                                                                                                                                                                                                                                                                                                                                                                                                                                                                                                                                                                                                            |                        |

|                                                                                                                                                                                                                                                                                                                                                                                                                                                                                                                                     |                                                                                                                                                                                                                                                                                        |
|-------------------------------------------------------------------------------------------------------------------------------------------------------------------------------------------------------------------------------------------------------------------------------------------------------------------------------------------------------------------------------------------------------------------------------------------------------------------------------------------------------------------------------------|----------------------------------------------------------------------------------------------------------------------------------------------------------------------------------------------------------------------------------------------------------------------------------------|
|                                                                                                                                                                                                                                                                                                                                                                                                                                                                                                                                     | Hui Shang                                                                                                                                                                                                                                                                              |
|                                                                                                                                                                                                                                                                                                                                                                                                                                                                                                                                     | Hong-Jin Wei                                                                                                                                                                                                                                                                           |
|                                                                                                                                                                                                                                                                                                                                                                                                                                                                                                                                     | Rui Zhang, PhD                                                                                                                                                                                                                                                                         |
|                                                                                                                                                                                                                                                                                                                                                                                                                                                                                                                                     | Li Liu                                                                                                                                                                                                                                                                                 |
|                                                                                                                                                                                                                                                                                                                                                                                                                                                                                                                                     | Yu_feng Gu                                                                                                                                                                                                                                                                             |
|                                                                                                                                                                                                                                                                                                                                                                                                                                                                                                                                     | Xian-Chun Zhang, PhD                                                                                                                                                                                                                                                                   |
|                                                                                                                                                                                                                                                                                                                                                                                                                                                                                                                                     | Yue-Hong Yan, Ph.D                                                                                                                                                                                                                                                                     |
| <b>Order of Authors Secondary Information:</b>                                                                                                                                                                                                                                                                                                                                                                                                                                                                                      |                                                                                                                                                                                                                                                                                        |
| <b>Opposed Reviewers:</b>                                                                                                                                                                                                                                                                                                                                                                                                                                                                                                           | <p>Hong Ma, PhD<br/>Huck Distinguished Research Professor of Plant Molecular Biology, Pennsylvania State University<br/>hxm16@psu.edu<br/>Potential competitor</p> <p>Fay-Wei Li, PhD<br/>Professor (Assistant), Cornell University<br/>fl329@cornell.edu<br/>Potential competitor</p> |
| <b>Additional Information:</b>                                                                                                                                                                                                                                                                                                                                                                                                                                                                                                      |                                                                                                                                                                                                                                                                                        |
| <b>Question</b>                                                                                                                                                                                                                                                                                                                                                                                                                                                                                                                     | <b>Response</b>                                                                                                                                                                                                                                                                        |
| Are you submitting this manuscript to a special series or article collection?                                                                                                                                                                                                                                                                                                                                                                                                                                                       | No                                                                                                                                                                                                                                                                                     |
| <p><b>Experimental design and statistics</b></p> <p>Full details of the experimental design and statistical methods used should be given in the Methods section, as detailed in our <a href="#">Minimum Standards Reporting Checklist</a>. Information essential to interpreting the data presented should be made available in the figure legends.</p> <p>Have you included all the information requested in your manuscript?</p>                                                                                                  | Yes                                                                                                                                                                                                                                                                                    |
| <p><b>Resources</b></p> <p>A description of all resources used, including antibodies, cell lines, animals and software tools, with enough information to allow them to be uniquely identified, should be included in the Methods section. Authors are strongly encouraged to cite <a href="#">Research Resource Identifiers</a> (RRIDs) for antibodies, model organisms and tools, where possible.</p> <p>Have you included the information requested as detailed in our <a href="#">Minimum Standards Reporting Checklist</a>?</p> | Yes                                                                                                                                                                                                                                                                                    |

|                                                                                                                                                                                                                                                                                                                                                                                                                                                                                                                                                         |            |
|---------------------------------------------------------------------------------------------------------------------------------------------------------------------------------------------------------------------------------------------------------------------------------------------------------------------------------------------------------------------------------------------------------------------------------------------------------------------------------------------------------------------------------------------------------|------------|
|                                                                                                                                                                                                                                                                                                                                                                                                                                                                                                                                                         |            |
| <p><b>Availability of data and materials</b></p> <p>All datasets and code on which the conclusions of the paper rely must be either included in your submission or deposited in <a href="#">publicly available repositories</a> (where available and ethically appropriate), referencing such data using a unique identifier in the references and in the “Availability of Data and Materials” section of your manuscript.</p> <p>Have you have met the above requirement as detailed in our <a href="#">Minimum Standards Reporting Checklist</a>?</p> | <p>Yes</p> |

# Large scale phylogenomic analysis resolves a backbone phylogeny in ferns

Hui Shen<sup>1,2#</sup>, Dongmei Jin<sup>1,2#</sup>, Jiang-Ping Shu<sup>1,2</sup>, Xi-Le Zhou<sup>1,2</sup>, Ming Lei<sup>3</sup>, Ran Wei<sup>4</sup>,  
Hui Shang<sup>1,2</sup>, Hong-Jin Wei<sup>1,2</sup>, Rui Zhang<sup>1,2</sup>, Li Liu<sup>1,2</sup>, Yu-Feng Gu<sup>1,2</sup>, Xian-Chun  
Zhang<sup>3</sup>, Yue-Hong Yan<sup>1,2\*</sup>

# Equal contributors

\*Corresponding author: [yhyan@sibs.ac.cn](mailto:yhyan@sibs.ac.cn)

<sup>1</sup>Shanghai Chenshan Plant Science Research Center, Chinese Academy of Sciences,  
Shanghai 201602, China; <sup>2</sup>Shanghai Key Laboratory of Plant Functional Genomics  
and Resources, Shanghai Chenshan Botanical Garden, Shanghai 201602, China;  
<sup>3</sup>Majorbio Bioinformatics Research Institute, Shanghai 201320, China. <sup>4</sup>State Key  
Laboratory of Systematic and Evolutionary Botany, Institute of Botany, Chinese  
Academy of Sciences, Beijing 100093, China.

## Abstract

**Background:** Ferns, originated about 360 million years ago, are the sister group of seed plants. Despite the remarkable progress in our understanding of fern phylogeny, with conflicting molecular evidences and different morphological interpretations, relationships among major fern lineages remain controversial.

**Results:** With the aim to obtain a robust fern phylogeny, we carried a large scale phylogenomic analysis using high-quality transcriptome sequencing data which covered 69 fern species from 38 families and 11 orders. Both coalescent-based and

1 22 concatenation-based methods were applied to both nucleotides and amino acids  
2  
3 23 sequences in species tree estimation. Among the mainly consistent and strongly  
4  
5  
6 24 supported cladograms, coalescent-based method using nucleotides sequence  
7  
8  
9 25 yielded the most robust cladogram.

10  
11 26 **Conclusions:** Our result confirmed that Equisetales is sister to the rest of ferns, and  
12  
13  
14 27 Dennstaedtiaceae is sister to eupolypods. Moreover, our result strongly supported  
15  
16  
17 28 some relationships new to the current view of fern phylogeny, including that  
18  
19  
20 29 Psilotaceae and Ophioglossaceae form a monophyletic clade which is sister to  
21  
22  
23 30 Marattiaceae; Gleicheniaceae and Hymenophyllaceae form a monophyletic clade  
24  
25  
26 31 which is sister to Dipteridaceae; and that Aspleniaceae is sister to the rest groups in  
27  
28  
29 32 eupolypods II. These results were interpreted with morphological traits, especially  
30  
31  
32 33 sporangia characters, and a new evolutionary route of sporangia annulus in ferns  
33  
34  
35 34 was suggested. This backbone phylogeny in ferns sets a foundation for further  
36  
37  
38 35 studies in biology and evolution in ferns, and therefore in plants.

39 36 **Key Words:** phylogenomic, monilophytes, evolution, sporangium, transcriptome  
40  
41

## 42 37 **Background**

43  
44  
45 38 Phylogeny, which reflects natural history, is fundamental to understanding evolution  
46  
47  
48 39 and biodiversity. Ferns (monilophytes), originated about 360 million years (MY) ago,  
49  
50  
51 40 are the sister group of seed plants [1, 2]. With estimated 10,578 extant living species  
52  
53  
54 41 globally [3], they are the second most diverse group in vascular plants. Phylogenetic  
55  
56  
57 42 studies for ferns, especially based on molecular evidences, have been widely carried  
58  
59  
60 43 in recent decades. These studies have revolutionized our understanding of the

1 44 evolution in ferns, among which the milestones being setting ferns as the sister group  
2  
3 45 of seed plants [1, 2], placing Psilotaceae and Equisetaceae within ferns [2, 4, 5], and  
4  
5  
6 46 revealing a major polypods radiation following the rise of angiosperms [6, 7].  
7  
8  
9 47 Resolution at shallow phylogenetic depth among families or genera have also been  
10  
11  
12 48 improved remarkably [8-14].  
13  
14

15 49 However, previous researches on fern phylogeny have mostly relied on plastid  
16  
17  
18 50 genes [10, 12, 13], some combined with a few nuclear genes [4, 5, 14] or  
19  
20  
21 51 morphological traits [5, 11]. Due to incomplete lineage sorting (ILS), genes from  
22  
23  
24 52 different resources often show conflicting evolutionary patterns, especially when  
25  
26  
27 53 based on a limited number of samples, some deep relationships in fern phylogeny  
28  
29  
30 54 remain controversial (Figure 1). In the latest PPG I system [3], which has derived  
31  
32  
33 55 from many recent phylogenetic studies, some important nodes remain uncertain,  
34  
35  
36 56 such as (i) what are the relationships among Marattiales, Ophiglossales and  
37  
38  
39 57 Psilotales? (ii) are Hymenophyllales and Gleicheniales sister groups? and (iii) what  
40  
41  
42 58 are the relationships among families in eupolypods II?  
43

44 59 Transcriptome sequencing (RNA-Seq) represents massive transcript information  
45  
46  
47 60 from the genome. Phylogenetic reconstructions basing on RNA-Seq are more  
48  
49  
50 61 efficient and cost-effective than traditional PCR-based or EST-based methods when  
51  
52  
53 62 lacking whole-genome data [15]. Successful cases in recent years include mollusks  
54  
55  
56 63 [16], insects [17], the grape family [18], angiosperms [19], and land plants including  
57  
58  
59 64 six ferns [20]. Here, with the aim to reconstruct the framework of fern phylogeny, we  
60  
61  
62  
63  
64  
65

1 65 sampled abundant fern species representing all important lineages and applied latest  
2  
3 66 phylogenomic analysis basing on RNA-Seq.  
4  
5  
6

7 67 To reconstruct a robust and well-resolved phylogeny in ferns, applying multiple  
8  
9 68 methods of phylogenomic analysis is extremely important. Since concatenation-  
10  
11 69 based estimations of species tree usually have good accuracy under low level of ILS,  
12  
13 70 while coalescent-based methods are developed to overcome the effect of ILS, but  
14  
15 71 are sensitive to gene tree estimation error [21], so both concatenation-based and  
16  
17 72 coalescent-based estimations are applied. Moreover, due to the fact that amino-acid  
18  
19 73 sequence is more conserved than nucleotide sequence, it may be more suited to  
20  
21 74 estimate relationships among distant taxa. While for close related taxa, the higher  
22  
23 75 variability of nucleotide sequence brings useful information to reconstruct  
24  
25 76 relationships that might not be differentiated using amino-acid sequence. Therefore,  
26  
27 77 both nucleotide and amino-acid sequences are used in phylogeny reconstruction.  
28  
29  
30  
31  
32  
33  
34  
35  
36

37 78 In the aspect of morphology, fern sporangium is an organ for enclosing and  
38  
39 79 dispersing spores, most of which functions like a unique catapult with annulus [22].  
40  
41 80 During the last centuries, Bower's hypothesis on the evolution of sporangia with a  
42  
43 81 focus on annulus [23] had been one of the most important cornerstones to fern  
44  
45 82 phylogeny based on morphology [24, 25]. However, this hypothesis has been  
46  
47 83 challenged by somewhat conflicting frameworks of fern phylogeny [4, 10, 12, 14, 26].  
48  
49 84 A robust framework in fern phylogeny which reflects the evolutionary history will  
50  
51 85 improve our understanding for the evolution of fern sporangia as well as other  
52  
53 86 characters.  
54  
55  
56  
57  
58  
59  
60  
61  
62  
63  
64  
65

1 87 **Data description**

2  
3 88 **Taxa sampling and RNA-Seq**

4  
5  
6 89 We chose 69 fern species from 38 families according to PPG I system (totally 48 fern  
7  
8  
9 90 families), covering all the 11 orders (Equisetales, Psilotales, Ophioglossales,  
10  
11  
12 91 Marattiales, Osmundales, Hymenophyllales, Gleicheniales, Schezaeles, Salviniiales,  
13  
14  
15 92 Cyatheales, and Polypodiales). Information about the location and time for sampling  
16  
17  
18 93 is given in Table S1. All the sampled species were collected under the permissions of  
19  
20  
21 94 the natural reserves and Shanghai Chenshan Botanical Garden in China.

22  
23 95 Sporophyll or/and trophophyll were collected and frozen in liquid nitrogen  
24  
25 96 immediately, and preserved in Ultra-low temperature refrigerator at -80°C before  
26  
27 97 RNA extraction. Total RNA was extracted using TRIzol (Life Technologies Corp.)  
28  
29 98 according to the manufacturer's protocols. The RNA concentration was determined  
30  
31 99 using a NanoDrop spectrophotometer, and RNA quality was assessed with an Agilent  
32  
33  
34 100 Bioanalyzer. Paired-end reads were generated by Majorbio Company (Shanghai,  
35  
36  
37 101 China) using the HiSeq 2500 system. Raw reads were deposited in GenBank [27].

38  
39  
40  
41 102 **Transcriptomes assembly and orthology assignment**

42  
43 103 Transcriptomes data were generated from 69 fern species (Table 1). After filtration,  
44  
45 104 about 2,726.9 million pair-end DNA sequence reads (about 313 Gbp) were retained.  
46  
47 105 We assembled these reads *de novo* and obtained a total of 5,449,842 contigs [28].

48  
49  
50  
51 106 In order to obtain a reliable phylogenetic relationship, we selected four species  
52  
53 107 as the outgroup, representing the main lineage of land plants: *Amborella trichopoda*  
54  
55 108 (representing angiosperms), *Picea abies* (representing gymnosperms), *Selaginella*  
56  
57 109 *moellendorffii* (representing lycophytes), *Physcomitrella patens* (representing  
58  
59 110 bryophytes). The translated ORF (protein) sequences of these four species were



111 downloaded from Phytozone [29] and used in the following analysis.

112 To ensure the consistency of phylogenomic analysis, we used a phylogenetic-  
113 based ortholog selection method, and obtained two subsets of “one to one”  
114 orthologous genes that differed in gene number and species occupancy rate, named  
115 “Matrix 1” and “Matrix 2” [30]. Matrix 1 consists of 2391 genes that are present in at  
116 least 52 taxa (that is 75% of the 69 taxa in total), resulted in 2,024,565 nucleotide  
117 and 674,855 amino acid positions, the gene and character occupancy were 88% and  
118 85% respectively. Matrix 2 consists of 1334 genes that are present in at least 62 taxa  
119 (that is 90% of the 69 taxa in total), resulted in 1,171,332 nucleotide and 390,444  
120 amino acid positions, the gene and character occupancy reached 94% and 90% in  
121 each. For each orthologues gene set, coalescent-based and concatenation-based  
122 methods were applied separately to both nucleotides and amino acids sequences. A  
123 working flow diagram showing the major processes in this study is given in Figure 2.

## 124 **Results**

### 125 **Species tree estimated in 69 ferns**

126 For each combination of estimation method (coalescent-based or concatenation-  
127 based) and sequence type (nucleotides or amino acids), the cladograms were  
128 identical between two results using Matrix 1 and Matrix 2 [31, 32]. In general, the four  
129 cladograms (Figure 3, Figure S1, S2, S3) yielded from combinations of method and  
130 sequence type are consistent except six sites (Table 2). Among the cladograms, the  
131 one estimated by applying coalescent-based method to nucleotide sequences  
132 (Figure 3) is the most agreed.

### 133 **Reconstruction of the evolution history of sporangia annulus**

1 134 Our reconstruction of the evolution of sporangia annulus showed that ex-annulus  
2  
3 135 sporangia are inferred to be the ancestral state (proportional likelihood [PL]: 1), and  
4  
5  
6 136 the rest of annulus states are likely derived from ex-annulus sporangia. Vertical  
7  
8  
9 137 annulus is suggested as synapomorphy for all polypod ferns (PL > 0.99). Both oblique  
10  
11  
12 138 annulus and rudimentary annulus have experienced parallel evolution.

## 139 **Discussion**

### 140 **Comparison of cladograms estimated by various methods**

141 By comparing cladograms estimated by coalescent-based and concatenation-based  
142 method using both nucleotide and amino-acid sequences (Table 2), we find that the  
143 cladograms yielded from coalescent-based and concatenation-based methods using  
144 nucleotide sequence are mostly consistent, except the location of *Angiopteris*  
145 *fokiensis*. Cladograms yielded from coalescent-based method using nucleotide  
146 sequence and amino-acid sequence showed three sites of inconsistency, all of which  
147 belong to eupolypods. Since eupolypods have experienced rapid evolutionary  
148 radiation in Cenozoic (Figure 3), and nucleotide sequences usually provide more  
149 information to reconstruct relationships among close related taxa, we consider the  
150 cladogram yielded from coalescent-based method using nucleotide sequence maybe  
151 more reliable. However, the inconsistent sites among cladograms often show  
152 relatively lower supporting values, and they are often controversial nodes among  
153 different researches based on different genes, we suggest these different results may  
154 be aroused partially by LIS and reticulate evolution.

### 155 **Relationships of eusporangiate ferns**

156 Which clade is sister to the remaining taxa in ferns is a long-debated question (Figure  
157 1). Our results strongly supported that Equisetales (horsetails) are the sister group to

1 158 all other monilophytes. This cladogram confirm the results reported for the first time  
2  
3 159 by Rothfels *et al.* in 2015 basing on 25 low-copy nuclear genes [14], and accepted by  
4  
5  
6 160 the PPG I [3] in 2016. Distinct from most fern phylogeny based on molecular  
7  
8  
9 161 evidences (Figure 1), our results revealed that Psilotales (whisk ferns),  
10  
11 162 Ophioglossales (moonworts), and Marattiales (king ferns) form a monophyletic clade  
12  
13 163 as ((Psilotales, Ophioglossales), Marattiales), which is sister to Leptosporangiate  
14  
15 164 ferns. The monophyletic origin of Psilotales, Ophioglossales, and Marattiales, which  
16  
17 165 belong to eusporangiate ferns, is supported by the structure of sporangia. Being  
18  
19  
20 166 different from the Leptosporangiate type, sporangia of eusporangiate ferns have no  
21  
22 167 sporangiophore, they are thick in wall and large in volume, produce a large amounts  
23  
24 168 of spores, and have no sporangia annulus or only a few thickened cells.  
25  
26  
27  
28  
29  
30

### 31 169 **Relationship of early leptosporangiates**

32  
33  
34 170 Within early leptosporangiates, our results revealed a new monophyletic clade that  
35  
36  
37 171 Gleicheniaceae (forking ferns) is sister to Hymenophyllaceae (filmy ferns), which is  
38  
39 172 different from the view of mainstream [3, 10, 12-14, 33]. Similar but still different from  
40  
41 173 the topology (((Dipteridaceae, Matoniaceae), Gleicheniaceae), Hymenophyllaceae)  
42  
43 174 reported by Pryer *et al.* in 2004 [5], in our results, *Cheiropleuria*, which belongs to  
44  
45 175 Dipteridaceae and formerly placed in Gleicheniales [2, 5, 12, 26, 34, 35], is sister to  
46  
47 176 the monophyletic clade of (Gleicheniaceae, Hymenophyllaceae).  
48  
49  
50  
51  
52  
53

54  
55 177 This new relationship is supported by sporangia character. Early  
56  
57 178 leptosporangiates [35] are characterized with diverse sporangia and annulus.  
58  
59  
60  
61  
62  
63  
64  
65

1 179 However, both Gleicheniaceae (forking ferns) and Hymenophyllaceae (filmy ferns)  
2  
3 180 have spherical sporangia with transverse-oblique annulus, as well as short  
4  
5  
6 181 sporangial stalk connecting to prominent receptacle [36]. Differently, flattened  
7  
8  
9 182 sporangia with slightly oblique annulus are found in *Cheiropleuria*. Moreover, long  
10  
11  
12 183 sporangial stalk and inapparent receptacle are common in *Cheiropleuria*, *Dipteris*  
13  
14  
15 184 and *Matonia*. We suggest Dipteridaceae, probably together with its sister lineage  
16  
17 185 Matoniaceae [5, 12], may form a sister lineage to the clade of (Gleicheniaceae,  
18  
19  
20 186 Hymenophyllaceae). According to our results, the Gleicheniales order, which is  
21  
22  
23 187 comprised of Dipteridaceae, Matoniaceae, and Gleicheniaceae [26], is no longer a  
24  
25  
26 188 monophyletic lineage, but a paraphyletic one.

### 29 **Relationships within polypod ferns**

30  
31  
32 190 Polypods include more than 80% of living ferns, and their phylogeny remains  
33  
34  
35 191 somewhat controversial and elusive [26, 34, 35]. Our results strongly supported that  
36  
37  
38 192 Dennstaedtiaceae instead of Pteridaceae, is sister to eupolypods. This pattern  
39  
40  
41 193 confirmed the topology suggested recently by Rothfels *et. al* basing on 25 low-copy  
42  
43  
44 194 nuclear genes [14] and Lu *et. al* basing on plastid genes [13], as well as PPG I  
45  
46  
47 195 system [3]. In our result, the disputation of inner relationships of Pteridaceae [33, 35,  
48  
49  
50 196 37] and Dennstaedtiaceae [35] are also well resolved. Notably, *Monachosorum* is  
51  
52  
53 197 sister to the rest members in Dennstaedtiaceae, rather than being sister to the  
54  
55  
56 198 lineage of *Peridium*, *Hypolepis* and *Histiopteris* [35].

57  
58 199 Our results showed that eupolypods are divided into two major lineages,  
59  
60  
61  
62  
63  
64  
65

1 200 eupolypods I and eupolypods II in agree with the consensus opinion. Within  
2  
3 201 eupolypods II, our results supported that Aspleniaceae is the sister group to the rest  
4  
5  
6 202 members, which is new to the current viewpoints [26, 35, 38]. Within eupolypods I,  
7  
8  
9 203 our result strongly supported that Lomariopsidaceae and Nephrolepidaceae form a  
10  
11  
12 204 paraphyletic group, rather than a monophyletic clade based on plastid genes [10, 26,  
13  
14 205 35].  
15  
16

17  
18 206 Our new phylogram confirmed the morphology-based hypothesis that  
19  
20  
21 207 Dennstaedtiaceae with two indusial, rather than Pteridaceae with one false indusium,  
22  
23  
24 208 is more close to eupolypod ferns [39]. In Pteridaceae, the unstable structure of  
25  
26  
27 209 spherical sporangial, including variable annulus and short sporangial stalk, indicates  
28  
29  
30 210 these sporangial are relatively primitive and are close to the sporangial with oblique  
31  
32  
33 211 annulus in early leptosporangiate [23]. We also noticed that the spherical sporangia  
34  
35  
36 212 with slightly oblique annulus in *Monachosorum* should be more primitive than the  
37  
38  
39 213 flattened sporangia with typical vertical annulate in other genera of Dennstaedtiaceae.  
40  
41  
42 214 For distinguishing eupolypods I and eupolypods II, the number and shape of the  
43  
44  
45 215 vascular bundles at the base of petiole have been demonstrated to be a powerful  
46  
47  
48 216 diagnostic character [35, 38].  
49

#### 50 217 **The evolution of sporangia annulus in ferns**

51  
52 218 By observing the character of sporangia annulus of abundant samples in each fern  
53  
54  
55 219 group, and reconstructing these characters onto our well-resolved backbone  
56  
57  
58 220 phylogeny (Figure 3), here we reconstructed the evolutionary history of sporangia  
59  
60  
61  
62  
63  
64  
65

1 221 annulus in ferns (Figure 4). First, exannulate sporangia, as in Equisetaceae,  
2  
3 222 Psilotaceae, and Ophioglossaceae, is the original type in ferns; followed by  
4  
5  
6 223 rudimentary multiseriate annulus, which is inverse U-shaped in Marattiaceae (a), and  
7  
8  
9 224 U-shaped in Osmundaceae (b); and by equatorial transverse-oblique uniseriate  
10  
11 225 annulus, as in Gleicheniaceae and Hymenophyllaceae. After that, the main route  
12  
13  
14 226 divides into two subroutes, one is towards apical annulus as in Lygodium and  
15  
16  
17 227 Schizaea, followed by vestige or disappeared annulus as in Salviniaceae (aquatic  
18  
19  
20 228 ferns); the other is towards oblique annulus as in Cyatheales (tree ferns), followed by  
21  
22  
23 229 vertical annulus as in polypods. Inconsistent with Bower's hypothesis [23], our results  
24  
25  
26 230 showed that sporangia with apical annulus as in Schizaeales are no longer the  
27  
28  
29 231 primitive type in ferns but a specialized one. Moreover, the oldest fossils of  
30  
31  
32 232 Schizaeaceae is now believed to appear in Jurassic (201-145 Ma BP) rather than  
33  
34  
35 233 formerly thought Carboniferous (359-252 Ma BP) [40].  
36

## 37 234 **Conclusion**

38  
39  
40 235 Our results confirmed that Equisetales is sister to all the other monilophytes, and  
41  
42  
43 236 Dennstaedtiaceae is sister to eupolypods which have been reported previously.  
44  
45  
46 237 Moreover, our results revealed some new relationships, such as eusporangiate ferns  
47  
48  
49 238 except Equisetales form a monophyletic clade as ((Psilotaceae, Ophioglossaceae),  
50  
51  
52 239 Marattiaceae); while Gleicheniaceae and Hymenophyllaceae form a monophyletic  
53  
54  
55 240 clade which is sister to Dipteridaceae; and Aspleniaceae is sister to the rest groups in  
56  
57  
58 241 eupolypods II. Most of these results are supported by sporangia characters, and a  
59  
60  
61 242 new evolutionary route of sporangia annulus in ferns is suggested.  
62

## 243 **Potential implications**

244 Here, we present a robust fern phylogeny yielded from a largescale phylogenomic  
245 analysis based on a high-quality RNA-seq dataset set covering 69 fern specie. This  
246 backbone phylogeny in ferns sets a foundation for further studies in biology and  
247 evolution in ferns and therefore in plants, especially when fern genomes are not  
248 available.

## 249 **Methods**

### 250 ***De novo* transcriptome assembly**

251 For each paired-end library, we first removed the Illumina adapter of raw reads using  
252 Scythe (32) and trimmed the poor quality bases using DynamicTrim Perl script of the  
253 SolexQA package with default parameters [41]. Next, *de novo* transcriptome  
254 assembly of each species was conducted using the Trinity package (version:  
255 trinityrnaseq\_r20140413) with default parameters [42]. To discard the duplicated  
256 sequences, the obtained contigs were clustered using CD-HIT-EST (v4.6.1) to  
257 generated a non-redundant contigs. All contigs with lengths greater than 200 bp were  
258 used for downstream analysis. We used the transDecoder, a program in the Trinity  
259 package, to identify the candidate coding sequences (CDSs) from the contigs with  
260 default criteria. Finally, the translated protein sequences of CDSs were searched by  
261 BLASTP against the NCBI nr protein database with an e-value threshold of 1E-5.  
262 These BLASTP hit sequences were used for further analysis.

### 263 **Orthology assignment, alignment, and alignment masking**

264 The orthology assignment for the 69 sample assemblies together with the four  
265 outgroup species employed a phylogenetic based clustering method described  
266 previously [16]. In short, all-vs-all BLAST search of amino acid sequence was  
267 performed among every species, the BLAST results were clustered using MCL [43]

1  
2  
3  
4  
5  
6  
7  
8  
9  
10  
11  
12  
13  
14  
15  
16  
17  
18  
19  
20  
21  
22  
23  
24  
25  
26  
27  
28  
29  
30  
31  
32  
33  
34  
35  
36  
37  
38  
39  
40  
268 software with the parameters '-l 2-tf 'gq(20)'. Optimization of the inflation parameter  
269 (l) was conducted as described previously [44], the default value 2.0 was selected  
270 ultimately. To reduce the complexity of each group, we removed all sequences of the  
271 species that had more than 10 sequences in this group. Then, groups with at least 35  
272 (50%) ferns species were aligned using einsu command, implemented in MAFFT [45],  
273 and trimmed by Gblocks with default parameters [46]. Next, for each group,  
274 homologous gene tree was built with RAxML software (version: 8.0.20) by  
275 implementing the maximum likelihood method (ML) [47]. To infer orthologous genes,  
276 we used treeprune.pyscript in the agalma [48] package to mask the monophyletic  
277 sequences. We pruned the paralogous subtrees from the homologous gene trees  
278 until only one monophyletic subtree retained. Next, the resulted orthologous gene  
279 trees were further filtered by the criteria that each species should be represented by  
280 only one sequence, this resulted subset genes were referred to "one to one  
281 orthologs", which were largely free of gene duplication. Then, we extracted both the  
282 CDSs (nucleotide sequence) and translated amino acid sequence from the each  
283 orthologous gene group, followed by aligning with MAFFT and trimming with  
284 Gblocks. The alignment which with coding and corresponding translated sequences  
285 lengths greater than 150 bp (or 50 amino acids) were kept for the further analysis.

#### 286 **BUSCO analysis**

41  
42  
43  
44  
45  
46  
47  
48  
49  
50  
51  
52  
53  
54  
55  
56  
57  
58  
59  
60  
61  
62  
63  
64  
65  
287 The Basic Universal Single Copy Orthologs (BUSCOs), which employ a core set of  
288 orthologs conserved in all eukaryotic species to determine the gene coverage degree  
289 of each assembly [49], was employed to assess the completeness of the  
290 transcriptome assembly we obtained (Table S2) [50]. A total of 303 BUSCOs were  
291 employed to blast against by translated amino acid of the assemblies using BLASTP.  
292 Then the number of complete and partially matched gene from each assembly was  
293 counted respectively. Out of 69 samples in total, 65 samples (that is 94.2% of total)  
294 were defined to have a relatively higher gene coverage degree. In these samples, at



1  
2  
3  
4  
5  
6  
7  
8  
9  
10  
11  
12  
13  
14  
15  
16  
17  
18  
19  
20  
21  
22  
23  
24  
25  
26  
27  
28  
29  
30  
31  
32  
33  
34  
35  
36  
37  
38  
39  
40  
41  
42  
43  
44  
45  
46  
47  
48  
49  
50  
51  
52  
53  
54  
55  
56  
57  
58  
59  
60  
61  
62  
63  
64  
65

295 least 251 complete genes (up to 295) could be identified, making the coverage rate  
296 exceeded 80%. Unexpectedly, among our total assemblies, 1 sample (*Aleuritopteris*  
297 *chrysophylla*, named RS\_72) present extremely low gene coverage degree, in which  
298 only 72 (23.8%) complete housekeeping genes could be found (Supplementary Table  
299 2). However, when the sample is deleted from the matrix used to construct the  
300 backbone of the phylogenetic tree, the cladogram remains unchanged, indicating that  
301 the lower completeness in this sample doesn't affect our results (data not shown).

### 302 **Phylogenetic analysis**

303 The coalescent-based species tree was reconstructed by ASTRAL v4.10.4 [51],  
304 carried out 100 replicates of multi-locus bootstrapping [52]. Statistically consistency  
305 was estimated from unrooted gene trees under the multi-species coalescent model.  
306 Each gene tree was constructed with the PROJTT model by RAxML v8.2.4 [47],  
307 performed 100 random replicates to calculate bootstrap value. For the concatenation  
308 analysis, we performed the maximum likelihood analyses (ML) for each matrix using  
309 RAxML software (version: 8.0.20). The branch support was evaluated using 100  
310 bootstrap replicates. We used the "GTR +  $\Gamma$ 4 + I" model for DNA matrices, and the  
311 JTT model for the corresponding protein matrices, selected by  
312 "ProtienModelselection.pl" [53]. To estimate the divergence times, we used the  
313 concatenated alignment of orthologs, calibrated with ages of two fossils  
314 (*Archaeocalamites Senftenbergia*: 354 MY, *Grammatopteris*: 280 MY [54] [6]) as the  
315 minimum ages of monilophytes and leptosporangiate ferns, respectively, and a  
316 maximum-age constraint of 500 MY for land plants, in a Bayesian relaxed clock  
317 method using MCMCTREE [55] on the coalescent species tree.

### 318 **Reconstruction of the evolution of sporangia annulus**

319 Characters of sporangia annulus of the sampled species were observed using a  
320 polarized light microscope (Axio Scope.A1, ZEISS) after the fresh and mature

1 321 sporangia were treated with sodium hypochlorite (NaClO) solution. The evolution of  
2  
3 322 sporangia annulus was reconstructed with likelihood method implemented in  
4  
5  
6 323 Mesquite v2.7.5 [56]. All character states (i.e., vertical annulus, oblique annulus,  
7  
8  
9 324 rudimentary annulus, ex-annulus, apical annulus, transverse annulus, and vestigial  
10  
11 325 annulus) were treated as unordered and equally weighted. To reconstruct character  
12  
13 326 evolution, a maximum likelihood approach using Markov k-state 1 parameter model  
14  
15  
16  
17 327 [57] was applied. To account for phylogenetic uncertainty, the “Trace-characters-over-  
18  
19  
20 328 trees” command was used to calculate ancestral states at each node including  
21  
22 329 probabilities in the context of likelihood reconstructions. To carry out these analyses,  
23  
24  
25 330 characters were plotted onto 100 trees that were sampled in the ML analyses of the  
26  
27  
28 331 combined dataset using RAxML v7. The results were finally summarized as  
29  
30  
31 332 percentage of changes of character states on a given branch among all 100 trees  
32  
33  
34 333 utilizing the option of “Average-frequencies-across-trees”.

## 334 **Declarations**

### 335 **List of abbreviations**

336 BUSCOs, the basic universal single copy orthologs;

337 ILS, incomplete lineage sorting;

338 MY, million years;

339 PPG, the pteridophyte phylogeny group;

340 RNA-Seq, transcriptome sequencing.

### 341 **Additional files**

342 Additional file1: Tables S1 to S2 and Figures S1 to S3.

1  
2  
3  
4  
5  
6  
7  
8  
9  
10  
11  
12  
13  
14  
15  
16  
17  
18  
19  
20  
21  
22  
23  
24  
25  
26  
27  
28  
29  
30  
31  
32  
33  
34  
35  
36  
37  
38  
39  
40  
41  
42  
43  
44  
45  
46  
47  
48  
49  
50  
51  
52  
53  
54  
55  
56  
57  
58  
59  
60  
61  
62  
63  
64  
65

343 **Availability of data and materials**

344 Raw reads of RNA-Seq for 69 fern species were deposited in GenBank under

345 Bioproject accession number PRJNA281136.

346 Transcriptome datasets for 69 fern species:

347 <https://figshare.com/s/0f773861b6813f97ff63>;

348 datasets of coalescent-based species tree:

349 <https://figshare.com/s/e5e70c2fd3990e5176d8>;

350 Datasets of concatenation based phylogenetic tree:

351 <https://figshare.com/s/8af236b660f61078e40b>;

352 Alignments: <https://figshare.com/s/f835735cb66911ff1ffd>;

353 BUSCO results: <https://figshare.com/s/bf999173d04b4c311d46>;

354 Scripts: <https://figshare.com/s/b28085ee6a7b69f758e9>.

355 **Consent for publication**

356 Not applicable

357 **Competing interests**

358 The authors declare that they have no competing interests

359 **Funding**

360 This work was funded by Shanghai Landscaping & City Appearance Administrative

361 Bureau of China, Scientific Research Grants (F132421 and F112422) and the

362 National Natural Science Foundation of China (31370234).

363 **Authors' contributions**

364 YHY and HShen conceived of and oversaw the study. YHY, HShen designed, ML,

365 JPS, RW, DMJ and LL implemented the data analyses. YHY, HShen, HJW, XLZ,

366 HShang and YFG collected the specimens. HShen, RZ and YFG prepared the

367 specimens for sequencing. XLZ provides the anatomical data. DMJ, HShen, YHY,

368 JPS, ML, RW, HShang, XLZ and XCZ wrote the manuscript.

1  
2  
3  
4  
5  
6  
7  
8  
9  
10  
11  
12  
13  
14  
15  
16  
17  
18  
19  
20  
21  
22  
23  
24  
25  
26  
27  
28  
29  
30  
31  
32  
33  
34  
35  
36  
37  
38  
39  
40  
41  
42  
43  
44  
45  
46  
47  
48  
49  
50  
51  
52  
53  
54  
55  
56  
57  
58  
59  
60  
61  
62  
63  
64  
65

369 **Acknowledgements**

370 We thank Dr. Lin-Bin Zhang, Prof. Yin-long Qiu and Paul G. Wolf from the USA and  
371 Dr. Jun Yang from Shanghai Chenshan Botanical Garden of China for providing  
372 important suggestions regarding the research methods. We appreciate Prof. Xiao-Ya  
373 Chen, Yong-Hong Hu, Jin-shuang Ma, and Zhao-qin Chu from Shanghai Chenshan  
374 Botanical Garden of China, as well as Prof. Fu-Wu Xing from South China Botanical  
375 Garden of CAS for helpful comments and suggestions. We also thank reviewers of  
376 the former manuscript Dr. Fay-Wei Li, Siavash Mirarab, and Naim Matasci for their  
377 helpful suggestions.

378 **Ethics approval and consent to participate**

379 Not applicable

380 **References**

- 381 1. Duff RJ, Nickrent DL. Phylogenetic relationships of land plants using mitochondrial  
382 small-subunit rDNA sequences. *Am J Bot*, 1999;86:372-86.
- 383 2. Pryer KM, Schneider H, Smith AR, Cranfill R, Wolf PG, Hunt JS, et al. Horsetails and  
384 ferns are a monophyletic group and the closest living relatives to seed plants. *Nature*.  
385 2001;409:618-22.
- 386 3. The Pteridophyte Phylogeny Group. A community-derived classification for extant  
387 lycophytes and ferns. *J Syst Evol*. 2016. doi:10.1111/jse.12229
- 388 4. Qiu Y-L, Li L, Wang B, Chen Z, Knoop V, Groth-Malonek M, et al. The deepest  
389 divergences in land plants inferred from phylogenomic evidence. *Proc Natl Acad Sci*  
390 *USA*. 2006;103:15511-6.
- 391 5. Pryer KM, Schuettpelz E, Wolf PG, Schneider H, Smith AR, Cranfill R. Phylogeny and  
392 evolution of ferns (monilophytes) with a focus on the early leptosporangiate divergences.  
393 *Am J Bot*. 2004;91:1582-98.
- 394 6. Schneider H, Schuettpelz E, Pryer KM, Cranfill R, Magallon S, Lupia R. Ferns  
395 diversified in the shadow of angiosperms. *Nature*. 2004;428:553-7.
- 396 7. Schuettpelz E, Pryer KM. Evidence for a Cenozoic radiation of ferns in an angiosperm-  
397 dominated canopy. *Proc Natl Acad Sci USA*. 2009;106:11200-5.

- 1  
2  
3  
4  
5  
6  
7  
8  
9  
10  
11  
12  
13  
14  
15  
16  
17  
18  
19  
20  
21  
22  
23  
24  
25  
26  
27  
28  
29  
30  
31  
32  
33  
34  
35  
36  
37  
38  
39  
40  
41  
42  
43  
44  
45  
46  
47  
48  
49  
50  
51  
52  
53  
54  
55  
56  
57  
58  
59  
60  
61  
62  
63  
64  
65
- 398 8. Zhang LB, Zhang L, Dong SY, Sessa EB, Gao XF, Ebihara A. Molecular circumscription  
399 and major evolutionary lineages of the fern genus *Dryopteris* (Dryopteridaceae). *BMC*  
400 *Evol Biol*. 2012. doi:10.1186/1471-2148-12-180.
  - 401 9. Liu H-M, Zhang X-C, Wang W, Qiu Y-L, Chen Z-D. Molecular phylogeny of the fern  
402 family dryopteridaceae inferred from chloroplast *rbcL* and *atpB* genes. *Int J Plant Sci*.  
403 2007;168:1311-23.
  - 404 10. Liu H-M. Embracing the pteridophyte classification of Ren-Chang Ching using a generic  
405 phylogeny of Chinese ferns and lycophytes. *J Syst Evol*. 2016;54:307-35.
  - 406 11. Schneider H, Smith AR, Pryer KM. Is morphology really at odds with molecules in  
407 estimating fern phylogeny? *Syst Bot*. 2009;34:455-75.
  - 408 12. Rai HS, Graham SW. Utility of a large, multigene plastid data set in inferring higher-  
409 order relationships in ferns and relatives (monilophytes). *Am J Bot*. 2010;97:1444-56.
  - 410 13. Lu J-M, Zhang N, Du X-Y, Wen J, Li D-Z. Chloroplast phylogenomics resolves key  
411 relationships in ferns. *J Syst Evol*. 2015;53:448-57.
  - 412 14. Rothfels CJ, Li F-W, Sigel EM, Huiet L, Larsson A, Burge DO, et al. The evolutionary  
413 history of ferns inferred from 25 low-copy nuclear genes. *Am J Bot*. 2015;102:1089-107.
  - 414 15. Hittinger CT, Johnston M, Tossberg JT, Rokas A. Leveraging skewed transcript  
415 abundance by RNA-Seq to increase the genomic depth of the tree of life. *Proc Natl Acad*  
416 *Sci USA*. 2010;107:1476-81.
  - 417 16. Smith S, Wilson N, Goetz F, Feehery C, Andrade S, Rouse G, et al. Resolving the  
418 evolutionary relationships of molluscs with phylogenomic tools. *Nature*. 2011;480:364-7.
  - 419 17. Misof B, Liu S, Meusemann K, Peters RS, Donath A, Mayer C, et al. Phylogenomics  
420 resolves the timing and pattern of insect evolution. *Science*. 2014;346:763-7.
  - 421 18. Wen J, Xiong Z, Nie Z-L, Mao L, Zhu Y, Kan X-Z, et al. Transcriptome sequences  
422 resolve deep relationships of the grape family. *Plos One*. 2013;8:e74394.
  - 423 19. Zeng L, Zhang Q, Sun R, Kong H, Zhang N, Ma H. Resolution of deep angiosperm  
424 phylogeny using conserved nuclear genes and estimates of early divergence times. *Nature*  
425 *Communications*. 2014. doi:10.1038/ncomms5956
  - 426 20. Wickett NJ, Mirarab S, Nam N, Warnow T, Carpenter E, Matasci N, et al.  
427 Phylotranscriptomic analysis of the origin and early diversification of land plants. *Proc*  
428 *Natl Acad Sci USA*. 2014;111:E4859-68.
  - 429 21. Mirarab S, Bayzid MS, Boussau B, Warnow T. Statistical binning enables an accurate  
430 coalescent-based estimation of the avian tree. *Science*, 2014.doi:10.1126/science.1250463

- 1  
2  
3  
4  
5  
6  
7  
8  
9  
10  
11  
12  
13  
14  
15  
16  
17  
18  
19  
20  
21  
22  
23  
24  
25  
26  
27  
28  
29  
30  
31  
32  
33  
34  
35  
36  
37  
38  
39  
40  
41  
42  
43  
44  
45  
46  
47  
48  
49  
50  
51  
52  
53  
54  
55  
56  
57  
58  
59  
60  
61  
62  
63  
64  
65
- 431 22. Noblin X, Rojas N, Westbrook J, Llorens C, Argentina M, Dumais J. The fern  
432 sporangium: a unique catapult. *Science*. 2012;335:1322.
- 433 23. Bower FO. The Ferns (Filicales) treated comparatively with a view to their natural  
434 classification. Vol 1-3. London: Cambridge University Press. 1923-1928.
- 435 24. Pichi-Sermolli REG. Historical review of the higher classification of the Filicopsida. In:  
436 Jermy AC, Crabb JA, Thomas BA, editors. *Phylogeny and classification of the ferns*.  
437 London: Bot J Linn Soc. 1973. p.11-40.
- 438 25. Smith AR. Non-molecular phylogenetic hypotheses for ferns. *Am Fern J*.  
439 1995;85(4):104-22.
- 440 26. Smith AR, Pryer KM, Schuettpelz E, Korall P, Schneider H, Wolf PG. A classification  
441 for extant ferns. *Taxon*. 2006;55:705-31.
- 442 27. Raw reads. <https://www.ncbi.nlm.nih.gov/bioproject/?term=PRJNA281136>. Accessed 5  
443 July 2017.
- 444 28. Transcriptome datasets. <https://figshare.com/s/0f773861b6813f97ff63>. Accessed 5 July  
445 2017.
- 446 29. Phytozone. <http://phytozome.jgi.doe.gov/>. Accessed 5 July 2017.
- 447 30. Alignments. Available from: <https://figshare.com/s/f835735cb66911ff1ffd>. Accessed 5  
448 July 2017.
- 449 31. Datasets of coalescent-based species tree. Available from:  
450 <https://figshare.com/s/e5e70c2fd3990e5176d8>. Accessed 5 July 2017.
- 451 32. Datasets of concatenation based phylogenetic tree. Available from:  
452 <https://figshare.com/s/8af236b660f61078e40b>. Accessed 5 July 2017.
- 453 33. Schneider H. Evolutionary morphology of ferns (monilophytes). *Annu Plant Rev*.  
454 2013;45:115-40.
- 455 34. Christenhusz MJM, Chase M. Trends and concepts in fern classification. *Ann Bot*.  
456 2014;113:571-94.
- 457 35. Schuettpelz E, Pryer KM. Fern phylogeny inferred from 400 leptosporangiate species and  
458 three plastid genes. *Taxon*. 2007;56:1037-50.
- 459 36. Bierhorst DW. *Morphology of vascular plants*. New York: Macmillan; 1971.

- 1  
2  
3  
4  
5  
6  
7  
8  
9  
10  
11  
12  
13  
14  
15  
16  
17  
18  
19  
20  
21  
22  
23  
24  
25  
26  
27  
28  
29  
30  
31  
32  
33  
34  
35  
36  
37  
38  
39  
40  
41  
42  
43  
44  
45  
46  
47  
48  
49  
50  
51  
52  
53  
54  
55  
56  
57  
58  
59  
60  
61  
62  
63  
64  
65
- 460 37. Schuettpelz E, Schneider H, Huiet L, Windham MD, Pryer KM. A molecular phylogeny  
461 of the fern family Pteridaceae: Assessing overall relationships and the affinities of  
462 previously unsampled genera. *Mol Phylogenet Evol.* 2007;44:1172-85.
- 463 38. Rothfels CJ, Sundue MA, Kuo L-Y, Larsson A, Kato M, Schuettpelz E, et al. A revised  
464 family-level classification for eupolypod II ferns (Polypodiidae: Polypodiales). *Taxon.*  
465 2012;61:515-33.
- 466 39. Mickel JT. The classification and phylogenetic position of the Dennstadiaceae. In  
467 Jeremy AC, Crabbe JA, Thomas BA, editors. *The phylogeny and classification of the*  
468 *ferns.* London: Academic Press for The Linnean Society of London. 1973. p. 135-44.
- 469 40. Taylor TN, Taylor EL, Krings M. *Paleobotany: The biology and evolution of fossil*  
470 *plants.* 2nd ed. San Diego: Academic Press. 2009. p. 1141
- 471 41. Cox MP, Peterson DA, Biggs PJ. SolexaQA: At-a-glance quality assessment of Illumina  
472 second-generation sequencing data. *BMC Bioinformatics.* 2010. doi:10.1186/1471-2105-  
473 11-485.
- 474 42. Grabherr MG, Haas BJ, Yassour M, Levin JZ, Thompson DA, Amit I, et al. Full-length  
475 transcriptome assembly from RNA-Seq data without a reference genome. *Nat Biotechnol.*  
476 2011;29:644-U130.
- 477 43. van Dongen S. A cluster algorithm for graphs. Technical Report INS-R0010, National  
478 Research Institute for Mathematics and Computer Science in the Netherlands. 2000.  
479 [http://micans.org/mcl/index.html?sec\\_thesisetc](http://micans.org/mcl/index.html?sec_thesisetc). Accessed 5 July 2017.
- 480 44. Hejnol A, Obst M, Stamatakis A, Ott M, Rouse GW, Edgecombe GD, et al. Assessing the  
481 root of bilaterian animals with scalable phylogenomic methods. *P Roy Soc B-Biol Sci.*  
482 2009;276:4261-70.
- 483 45. Katoh K, Standley DM. MAFFT Multiple Sequence Alignment Software Version 7:  
484 Improvements in Performance and Usability. *Mol Biol Evol.* 2013;30:772-80.
- 485 46. Talavera G, Castresana J. Improvement of phylogenies after removing divergent and  
486 ambiguously aligned blocks from protein sequence alignments. *Syst Biol.* 2007;56:564-  
487 77.
- 488 47. Stamatakis A. RAxML: a tool for phylogenetic analysis and post-analysis of large  
489 phylogenies. *Bioinformatics.* 2014;30:1312-3.
- 490 48. Dunn CW, Howison M, Zapata F. Agalma: an automated phylogenomics workflow.  
491 *BMC Bioinformatics.* 2013;14:330.

1  
2  
3  
4  
5  
6  
7  
8  
9  
10  
11  
12  
13  
14  
15  
16  
17  
18  
19  
20  
21  
22  
23  
24  
25  
26  
27  
28  
29  
30  
31  
32  
33  
34  
35  
36  
37  
38  
39  
40  
41  
42  
43  
44  
45  
46  
47  
48  
49  
50  
51  
52  
53  
54  
55  
56  
57  
58  
59  
60  
61  
62  
63  
64  
65

492 49. Simao FA, Waterhouse RM, Ioannidis P, Kriventseva EV, Zdobnov EM. BUSCO:  
493 assessing genome assembly and annotation completeness with single-copy orthologs.  
494 *Bioinformatics*. 2015;31:3210-2.

495 50. BUSCO results. <https://figshare.com/s/bf999173d04b4c311d46>. Accessed 5 July 2017

496 51. Mirarab S, Reaz R, Bayzid MS, Zimmermann T, Swenson MS, Warnow T. ASTRAL:  
497 genome-scale coalescent-based species tree estimation. *Bioinformatics*. 2014;30:I541-8.

498 52. Seo TK. Calculating bootstrap probabilities of phylogeny using multilocus sequence data.  
499 *Mol Biol Evol*. 2008;25:960-71.

500 53. ProtienModelselection.pl. <https://github.com/stamatak/standard-RAxML/>. Accessed 5  
501 July 2017.

502 54. Rößler R, Galtier J. First Grammatopteris tree ferns from the Southern Hemisphere – new  
503 insights in the evolution of the Osmundaceae from the Permian of Brazil. *Rev Palaeobot*  
504 *Palynol*. 2002;121:205-30.

505 55. dos Reis M, Yang Z. Approximate Likelihood Calculation on a Phylogeny for Bayesian  
506 Estimation of Divergence Times. *Mol Biol Evol*. 2011;28:2161-72.

507 56. Maddison WP, Maddison DR. Mesquite: a modular system for evolutionary analysis.  
508 2011. <http://mesquiteproject.org>. Accessed 5 July 2017.

509 57. Lewis PO, Olmstead R. A Likelihood Approach to Estimating Phylogeny from Discrete  
510 Morphological Character Data. *Syst Biol*. 2001;50:913-925.

511



1 512 **Figure legends**

2  
3 513 **Figure 1. Cladograms (a-f) adapted from published results [5, 12-14, 26, 33].**

4  
5  
6 514 Branches with support < 75% were shown using dotted lines; and taxa which differ in  
7  
8  
9 515 their phylogeny locations were shown in different colors.

10  
11  
12 516 **Figure 2. A working flow diagram showing the major processes of data**

13  
14  
15 517 **production and analysis in this study.** Three major processes are De novo  
16  
17  
18 518 transcriptome assembly, one-to-one orthologs prediction, and phylogenetic analysis.

19  
20  
21 519 The rectangles represent the main results and the ellipses represent the main  
22  
23  
24 520 methods and analysis.

25  
26  
27 521 **Figure 3. Phylogeny of ferns reconstructed by coalescent-based method using**

28  
29  
30 522 **nucleotide sequence with divergence times calculated.** Support values for the

31  
32  
33 523 main phylogeny (a) calculated from Matrix 1/Matrix 2 are listed as percentages; \*

34  
35  
36 524 indicates 100%/100%. Representative leave(s), sporangium and the corresponding

37  
38  
39 525 lineage are labeled with a same number. Simplified cladogram (b) shows the main

40  
41  
42 526 linages as in Figure 1. Species in phylogeny (a) and the corresponding lineage in

43  
44  
45 527 cladogram (b) are shown in a same color.

46  
47  
48 528 **Figure 4. Reconstructed evolutionary history of sporangia annulus in ferns.**

49  
50  
51 529 Sampled species with seven types of sporangia annulus are shown in different

52  
53  
54 530 colours. For each ancient node, percentage of character state of sporangia annulus

55  
56  
57 531 is shown.

58  
59  
60 532

**Table 1. Sequencing and assembly information of the transcriptome data.** The number of ortholog genes used in Matrix 1 and Matrix 2 were shown.

| ID    | Species                               | Clean data (G) | Total reads (clean) | Q30%  | Number of contigs | N50 (bp) | Mean (bp) | Genes in Matrix 1 | Genes in Matrix 2 |
|-------|---------------------------------------|----------------|---------------------|-------|-------------------|----------|-----------|-------------------|-------------------|
| RS1   | <i>Pronephrium simplex</i>            | 4.7            | 38045864            | 91.24 | 151319            | 887      | 581.07    | 2,168             | 1,254             |
| RS10  | <i>Antrophyum callifolium</i>         | 4.0            | 32745384            | 91.76 | 64107             | 1819     | 998.73    | 2,226             | 1,305             |
| RS101 | <i>Oleandra musifolia</i>             | 4.5            | 36487068            | 91.45 | 37075             | 1493     | 919.3     | 2,093             | 1,248             |
| RS103 | <i>Woodsia polystichoides</i>         | 3.9            | 31465870            | 90.91 | 47812             | 1348     | 811.3     | 2,287             | 1,310             |
| RS107 | <i>Equisetum diffusum</i>             | 4.4            | 35693238            | 90.21 | 88932             | 1154     | 655.64    | 1,811             | 1,254             |
| RS108 | <i>Oreogrammitis dorsipila</i>        | 4.6            | 37037324            | 90.57 | 266540            | 591      | 485.1     | 2,141             | 1,273             |
| RS11  | <i>Vandenboschia striata</i>          | 4.8            | 38639790            | 90.3  | 261724            | 460      | 422.76    | 1,959             | 1,276             |
| RS111 | <i>Pleurosoriopsis makinoi</i>        | 4.8            | 38983796            | 90.13 | 98187             | 1145     | 632.29    | 2,182             | 1,277             |
| RS112 | <i>Azolla pinnata subsp. asiatica</i> | 4.4            | 35735206            | 90.57 | 78295             | 1348     | 777.92    | 1,418             | 839               |
| RS114 | <i>Taenitis blechnoides</i>           | 4.1            | 32898682            | 90.98 | 70495             | 1262     | 711.3     | 2,186             | 1,278             |
| RS115 | <i>Gymnogrammitis dareiformis</i>     | 3.9            | 31630988            | 89.81 | 119483            | 569      | 449.38    | 1,996             | 1,220             |
| RS116 | <i>Schizaea dichotoma</i>             | 4.5            | 36668734            | 89.6  | 67422             | 1350     | 826.92    | 2,035             | 1,285             |
| RS119 | <i>Botrychium japonicum</i>           | 4.8            | 38603000            | 90.28 | 85236             | 1477     | 846.97    | 1,866             | 1,283             |
| RS122 | <i>Goniophlebium niponicum</i>        | 4.8            | 38786214            | 90.82 | 54152             | 1663     | 951.92    | 2,279             | 1,300             |
| RS123 | <i>Arthropteris palisotii</i>         | 4.4            | 35646740            | 91    | 50700             | 1454     | 891.67    | 2,286             | 1,311             |
| RS124 | <i>Matteuccia struthiopteris</i>      | 4.2            | 34080998            | 90.44 | 57514             | 1345     | 776.52    | 2,290             | 1,313             |
| RS127 | <i>Salvinia natans</i>                | 4.2            | 33780056            | 91.17 | 79393             | 1379     | 767.14    | 1,905             | 1,173             |
| RS128 | <i>Woodwardia prolifera</i>           | 5.1            | 40967322            | 91.63 | 69931             | 1557     | 859.72    | 2,328             | 1,328             |
| RS14  | <i>Diplazium viridescens</i>          | 4.0            | 32320416            | 90.46 | 88236             | 1434     | 780.87    | 2,269             | 1,310             |
| RS16  | <i>Bolbitis appendiculata</i>         | 4.7            | 37503336            | 91.66 | 201426            | 802      | 556.39    | 2,226             | 1,288             |
| RS17  | <i>Dryopteris pseudocaenopteris</i>   | 4.1            | 33136196            | 91.23 | 102751            | 723      | 514.92    | 2,236             | 1,298             |
| RS18  | <i>Dicranopteris pedata</i>           | 4.2            | 33942120            | 92.04 | 74011             | 1193     | 684.09    | 2,031             | 1,304             |
| RS19  | <i>Haplopteris amboinensis</i>        | 4.2            | 42772168            | 94.17 | 47603             | 1713     | 1041.8    | 2,249             | 1,307             |
| RS21  | <i>Psilotum nudum</i>                 | 8.5            | 85199034            | 93.6  | 66212             | 1739     | 927.19    | 1,741             | 1,223             |
| RS24  | <i>Cyclopeltis crenata</i>            | 4.6            | 37158058            | 91.5  | 29668             | 600      | 491.82    | 2,146             | 1,279             |
| RS25  | <i>Asplenium formosae</i>             | 4.6            | 46629754            | 93.5  | 73318             | 1722     | 989.84    | 2,273             | 1,312             |
| RS27  | <i>Lomariopsis spectabilis</i>        | 4.1            | 33233594            | 91.77 | 98030             | 1466     | 750.42    | 2,225             | 1,304             |
| RS28  | <i>Cheiropleuria bicuspis</i>         | 5.1            | 41617294            | 91.35 | 99411             | 1435     | 832.82    | 2,022             | 1,295             |
| RS31  | <i>Plagiogyria japonica</i>           | 5.7            | 46472760            | 91.92 | 89532             | 1258     | 733.9     | 2,036             | 1,222             |
| RS34  | <i>Alsophila podophylla</i>           | 4.9            | 48768608            | 93.43 | 66254             | 1580     | 904.62    | 2,195             | 1,289             |
| RS35  | <i>Histiopteris incisa</i>            | 4.3            | 43115390            | 93.81 | 61231             | 1749     | 985.03    | 2,319             | 1,316             |
| RS36  | <i>Pteris vittata</i>                 | 4.1            | 41212858            | 94.37 | 76666             | 1868     | 1021.13   | 2,296             | 1,312             |
| RS37  | <i>Cibotium barometz</i>              | 4.1            | 33263550            | 91.92 | 85555             | 1612     | 891.87    | 1,790             | 1,099             |
| RS38  | <i>Osmunda japonica</i>               | 4.1            | 33485274            | 92.05 | 58612             | 1730     | 901.28    | 1,732             | 1,159             |
| RS39  | <i>Loxogramme chinensis</i>           | 3.9            | 31392952            | 92.16 | 84796             | 1065     | 651.88    | 2,240             | 1,305             |
| RS4   | <i>Microlepia hookeriana</i>          | 4.0            | 40561422            | 94.49 | 95951             | 1610     | 874.06    | 2,262             | 1,301             |
| RS41  | <i>Pteridium aquilinum</i>            | 4.6            | 46157134            | 93.51 | 55615             | 1742     | 960.37    | 2,321             | 1,316             |

|      |                                    |     |            |       |        |      |         |       |       |
|------|------------------------------------|-----|------------|-------|--------|------|---------|-------|-------|
| RS42 | <i>Hypolepis punctata</i>          | 4.4 | 43828154   | 93.56 | 59717  | 1371 | 833.68  | 2,277 | 1,308 |
| RS43 | <i>Dicksonia antarctica</i>        | 3.9 | 31210608   | 91.69 | 56494  | 1533 | 902.96  | 2,045 | 1,213 |
| RS45 | <i>Rhachidosorus mesosorus</i>     | 4.4 | 35348994   | 91.98 | 80069  | 1541 | 835.92  | 2,300 | 1,315 |
| RS46 | <i>Drynaria bonii</i>              | 4.5 | 36017548   | 92.02 | 68132  | 1077 | 643.93  | 2,176 | 1,279 |
| RS47 | <i>Platycterium bifurcatum</i>     | 4.1 | 33209740   | 91.62 | 40456  | 1097 | 694.56  | 2,148 | 1,283 |
| RS48 | <i>Angiopteris fokiensis</i>       | 4.4 | 35120302   | 91.12 | 57637  | 1629 | 932.57  | 1,917 | 1,306 |
| RS5  | <i>Diplaziopsis brunoniana</i>     | 4.3 | 34698846   | 91.35 | 70184  | 822  | 541.31  | 2,040 | 1,234 |
| RS50 | <i>Dennstaedtia pilosella</i>      | 4.5 | 45618446   | 93.63 | 84813  | 1582 | 831.56  | 2,308 | 1,313 |
| RS51 | <i>Monachosorum henryi</i>         | 4.1 | 41658504   | 93.42 | 87832  | 1465 | 803.17  | 2,255 | 1,288 |
| RS52 | <i>Acystopteris japonica</i>       | 5.5 | 44662146   | 91.15 | 57118  | 1507 | 873.59  | 1,222 | 677   |
| RS53 | <i>Monachosorum maximowiczii</i>   | 4.8 | 48497004   | 93.58 | 101448 | 1817 | 899.54  | 2,257 | 1,294 |
| RS54 | <i>Dennstaedtia scabra</i>         | 5.1 | 51360716   | 93.47 | 92158  | 1565 | 845.44  | 1,818 | 1,056 |
| RS56 | <i>Arachniodes nigrospinosa</i>    | 5.1 | 50929362   | 94.47 | 57168  | 1623 | 916.1   | 2,332 | 1,319 |
| RS69 | <i>Cheilanthes chusana</i>         | 5.2 | 51851066   | 94.18 | 49449  | 1727 | 1012.63 | 2,317 | 1,324 |
| RS7  | <i>Elaphoglossum mcclurei</i>      | 4.1 | 32800248   | 92.31 | 57330  | 1398 | 846.79  | 2,267 | 1,299 |
| RS70 | <i>Lomagramma matthewii</i>        | 4.4 | 35218876   | 91.21 | 65170  | 1748 | 947.18  | 2,258 | 1,307 |
| RS71 | <i>Osmolindsaea odorata</i>        | 4.6 | 46808646   | 94.13 | 113778 | 1521 | 845.96  | 2,257 | 1,312 |
| RS72 | <i>Aleuritopteris chrysophylla</i> | 4.8 | 47955674   | 94.18 | 61637  | 1669 | 929.63  | 2,307 | 1,322 |
| RS77 | <i>Marsilea quadrifolia</i>        | 4.3 | 34724432   | 91.76 | 65227  | 1607 | 930.31  | 2,188 | 1,299 |
| RS8  | <i>Humata repens</i>               | 4.5 | 36606746   | 91.17 | 68932  | 1267 | 690.35  | 2,264 | 1,315 |
| RS81 | <i>Tectaria subpedata</i>          | 4.2 | 42539482   | 94.43 | 57384  | 1326 | 797.83  | 2,128 | 1,242 |
| RS84 | <i>Ophioglossum vulgatum</i>       | 4.4 | 35637330   | 91.77 | 71821  | 1226 | 741.62  | 1,631 | 1,179 |
| RS85 | <i>Nephrolepis cordifolia</i>      | 5.0 | 40063236   | 90.81 | 55207  | 1530 | 842.63  | 2,302 | 1,319 |
| RS86 | <i>Microlepia platyphylla</i>      | 4.6 | 46324294   | 94    | 74956  | 1763 | 945.87  | 2,267 | 1,295 |
| RS88 | <i>Lygodium flexuosum</i>          | 4.2 | 34098316   | 91.44 | 66751  | 1514 | 867.82  | 2,064 | 1,296 |
| RS89 | <i>Hypodematum crenatum</i>        | 4.1 | 32711798   | 91.58 | 52813  | 1416 | 852.57  | 2,298 | 1,319 |
| RS90 | <i>Acrostichum aureum</i>          | 5.4 | 43422574   | 90.69 | 46189  | 1729 | 1043.2  | 2,303 | 1,319 |
| RS91 | <i>Adiantum caudatum</i>           | 5.1 | 51062204   | 94.23 | 51145  | 1575 | 950.49  | 2,323 | 1,327 |
| RS92 | <i>Parahemionitis cordata</i>      | 4.1 | 33309450   | 91.72 | 47508  | 1456 | 894.42  | 2,306 | 1,317 |
| RS93 | <i>Microlepia speluncae</i>        | 4.4 | 44124842   | 94.55 | 94980  | 1720 | 917.59  | 2,292 | 1,308 |
| RS97 | <i>Stenochlaena palustris</i>      | 4.7 | 37887642   | 91.81 | 58416  | 1655 | 945.83  | 2,300 | 1,316 |
| RS98 | <i>Ceratopteris thalictroides</i>  | 3.9 | 31741082.0 | 91.4  | 74728  | 1610 | 912.26  | 2,231 | 1,296 |

**Table 2. Inconsistent topologies using different methods and sequences.**

| Site | Coalescent-based method       |                               | Concatenation-based method   |                              |
|------|-------------------------------|-------------------------------|------------------------------|------------------------------|
|      | nucleotide                    | amino-acid                    | nucleotide                   | amino-acid                   |
| A    | <b>(Anfo,(Pnu,(Ovu,Bja)))</b> | <b>(Anfo,(Pnu,(Ovu,Bja)))</b> | ((Pnu,(Ovu,Bja)),(Anfo,#))   | ((Pnu,(Ovu,Bja)),(Anfo,#))   |
| B    | <b>(Cbi,(Dpe,Vst))</b>        | <b>(Cbi,(Dpe,Vst))</b>        | <b>(Cbi,(Dpe,Vst))</b>       | ((Dpe,Vst),(Cbi,#))          |
| C    | <b>(Asfo,(Aja,(Dbr,#)))</b>   | <b>(Asfo,(Aja,(Dbr,#)))</b>   | <b>(Asfo,(Aja,(Dbr,#)))</b>  | (Asfo,((Aja,Dbr),#))         |
| D    | <b>(Dvi,(Mst,(Spa,Wpr)))</b>  | ((Dvi,Mst),(Spa,Wpr))         | <b>(Dvi,(Mst,(Spa,Wpr)))</b> | <b>(Dvi,(Mst,(Spa,Wpr)))</b> |
| E    | <b>(Bap,(Emc,Lma))</b>        | (Emc,(Bap,Lma))               | <b>(Bap,(Emc,Lma))</b>       | (Emc,(Bap,Lma))              |
| F    | <b>(Nco,((Tsu,Apa),#))</b>    | (Nco,(Tsu,(Apa,#)))           | <b>(Nco,((Tsu,Apa),#))</b>   | <b>(Nco,((Tsu,Apa),#))</b>   |

(A) Anfo: *Angiopteris fokiensis*, Pnu: *Psilotum nudum*, Ovu: *Ophioglossum vulgatum*, Bja: *Botrychium japonicum*; (B) Cbi: *Cheiropleuria bicuspis*, Dpe: *Dicranopteris pedata*, Vst: *Vandenboschia striata*; (C) Asfo: *Asplenium formosae*, Aja: *Acystopteris japonica*, Dbr: *Diplaziopsis brunoniana*; (D) Dvi: *Diplazium viridescens*, Mst: *Matteuccia struthiopteris*, Spa: *Stenochlaena palustris*, Wpr: *Woodwardia prolifera*; (E) Bap: *Bolbitis appendiculata*, Emc: *Elaphoglossum mcclurei*, Lma: *Lomagramma matthewii*; (F) Nco: *Nephrolepis cordifolia*, Tsu: *Tectaria subpedata*, Apa: *Arthropteris palisotii*. # indicates other sampled species within this lineage. Topologies consistent with the one yielded from coalescent-based method and nucleotide sequences are shown in bold.

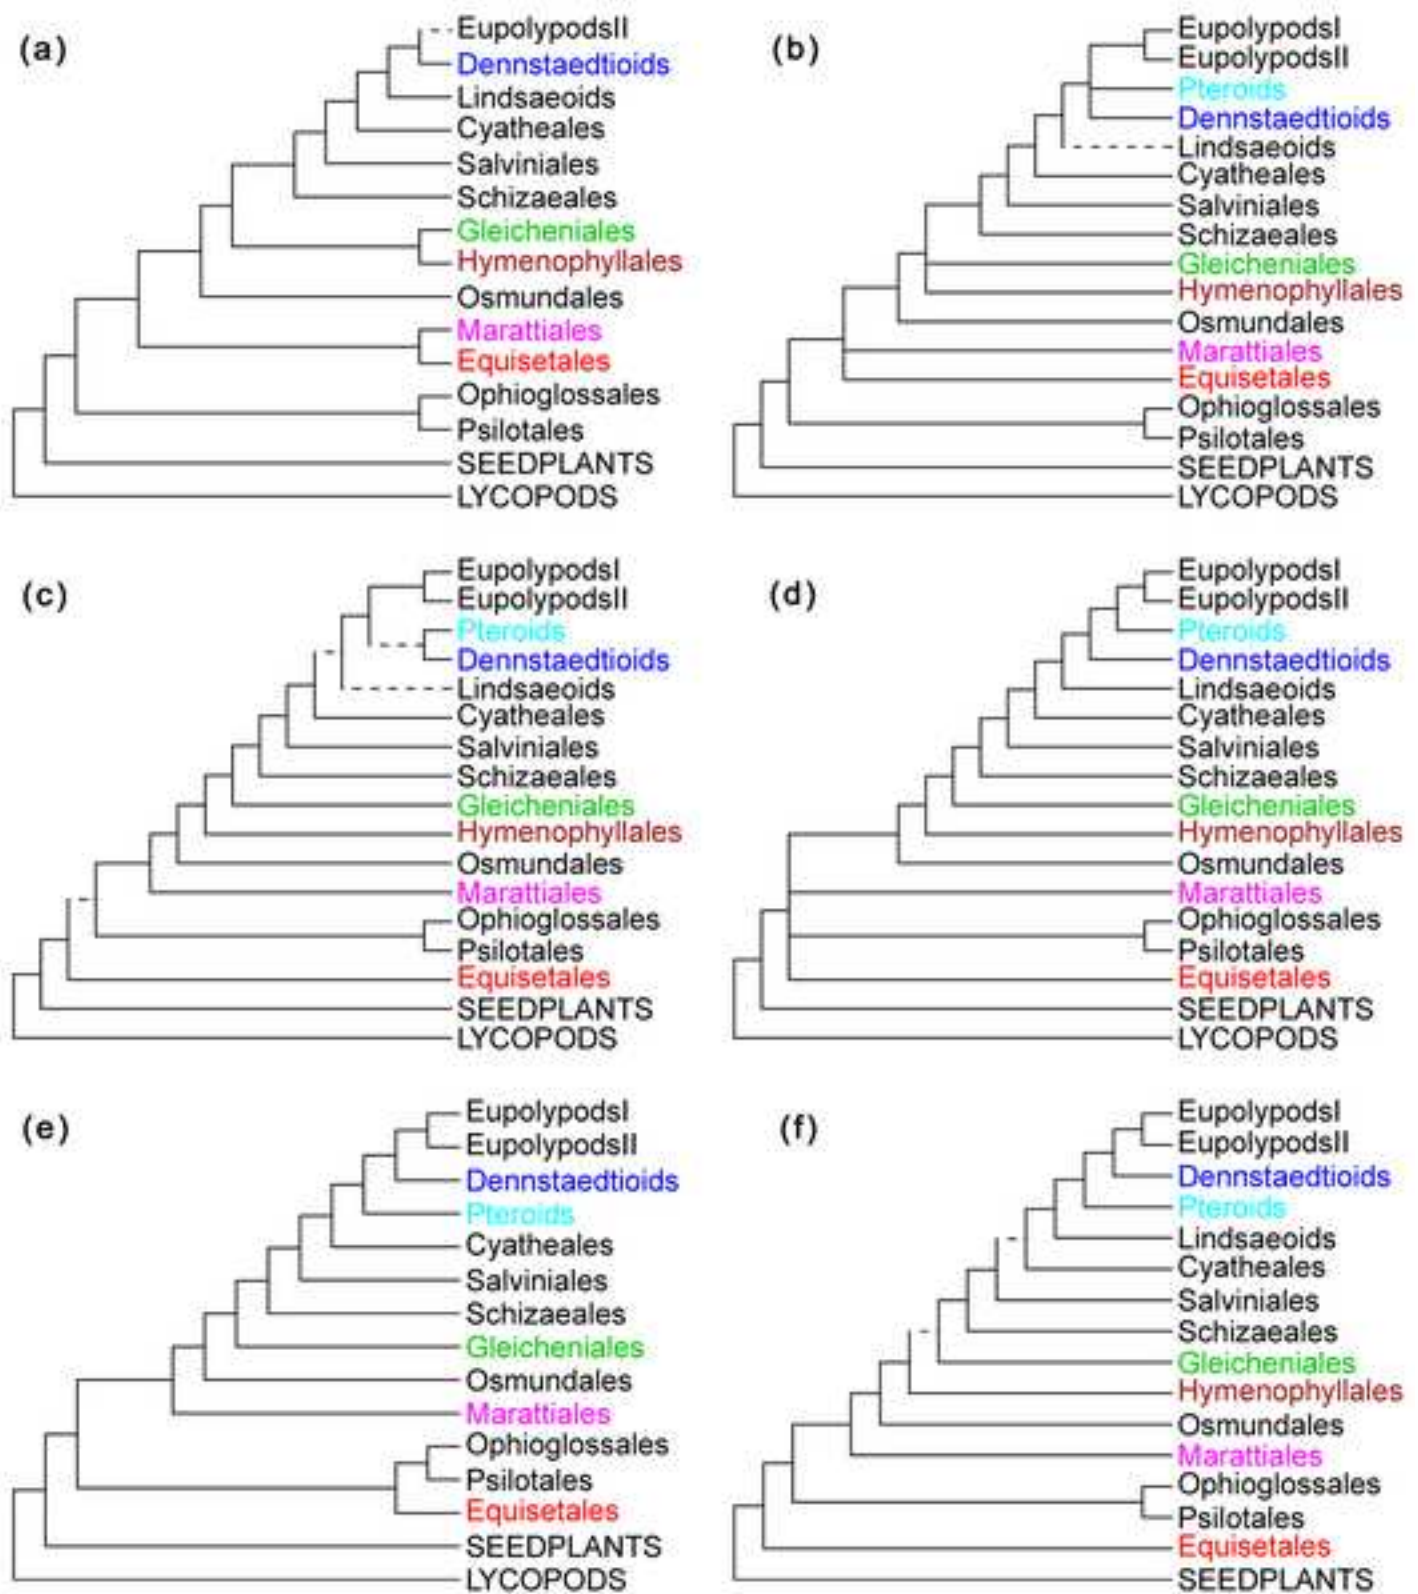

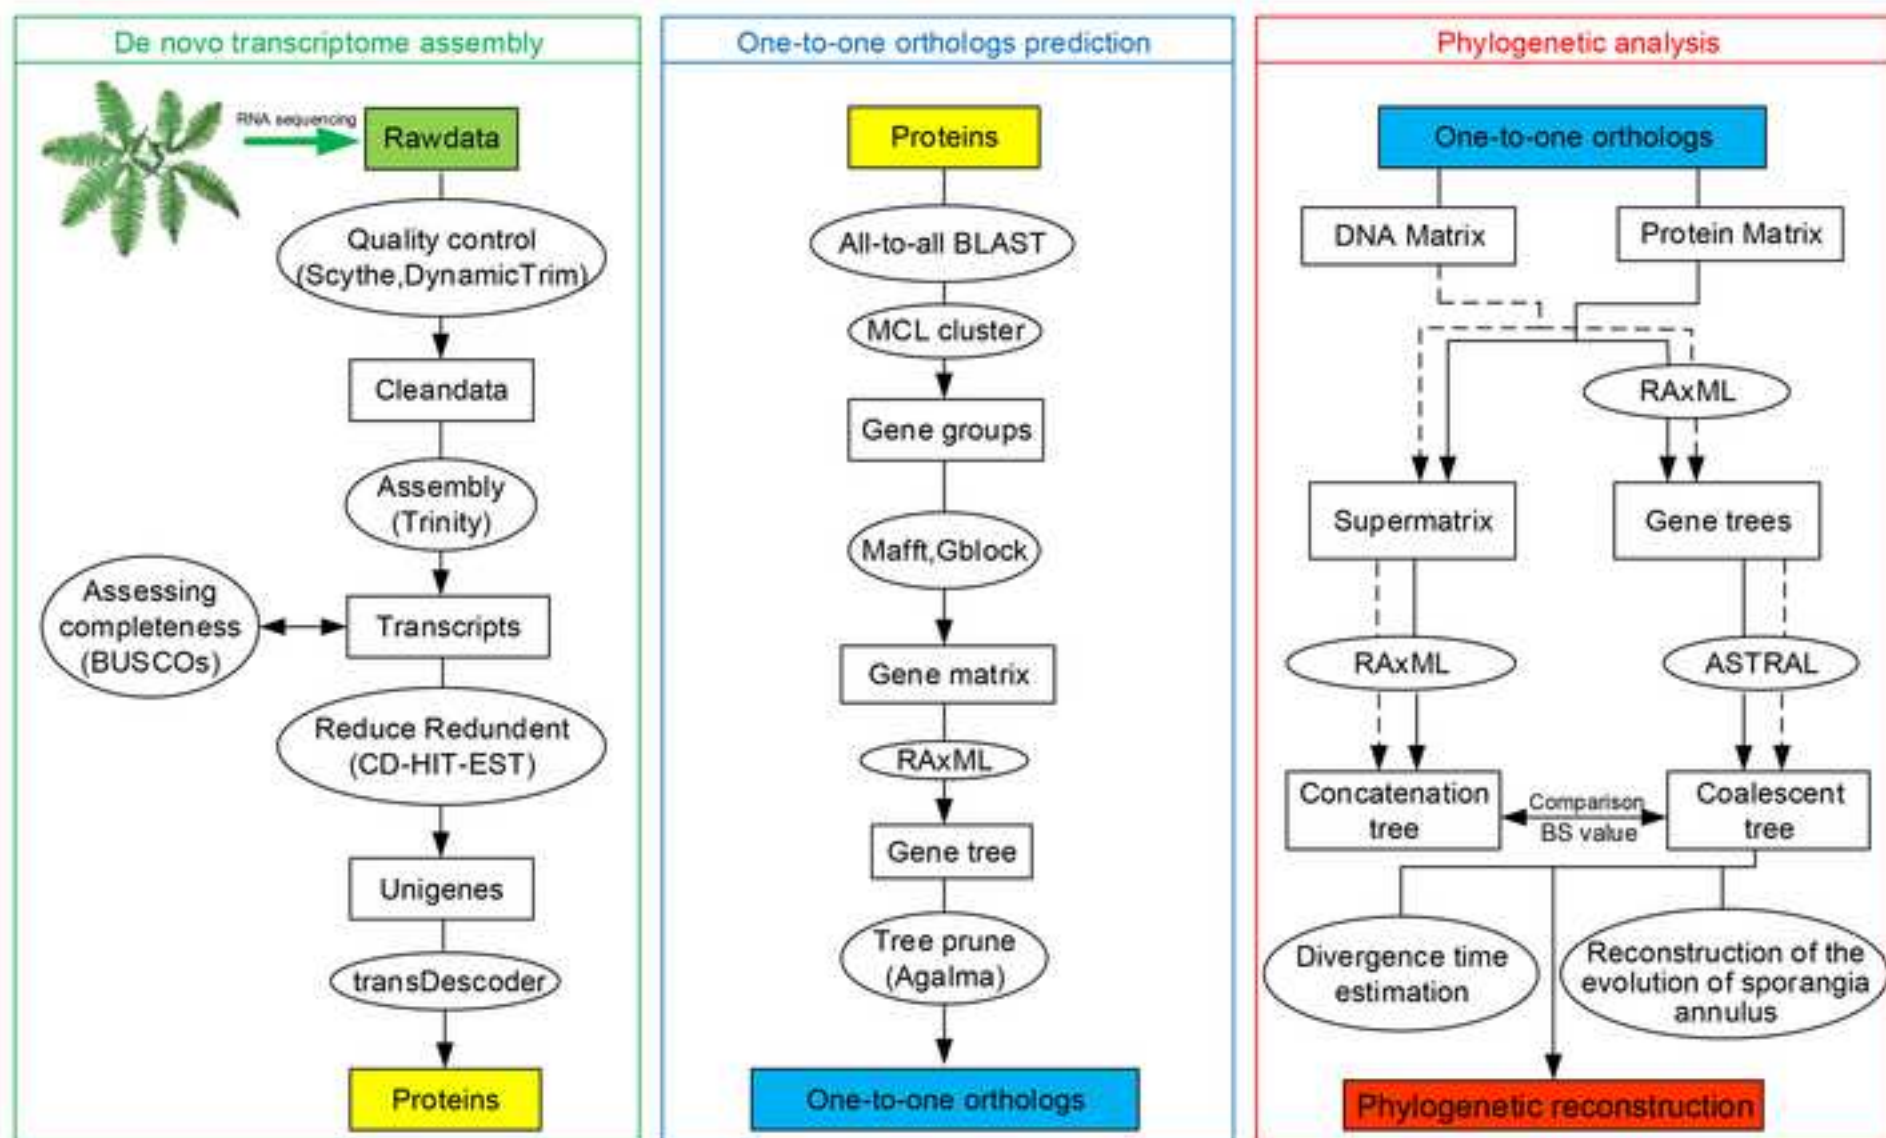

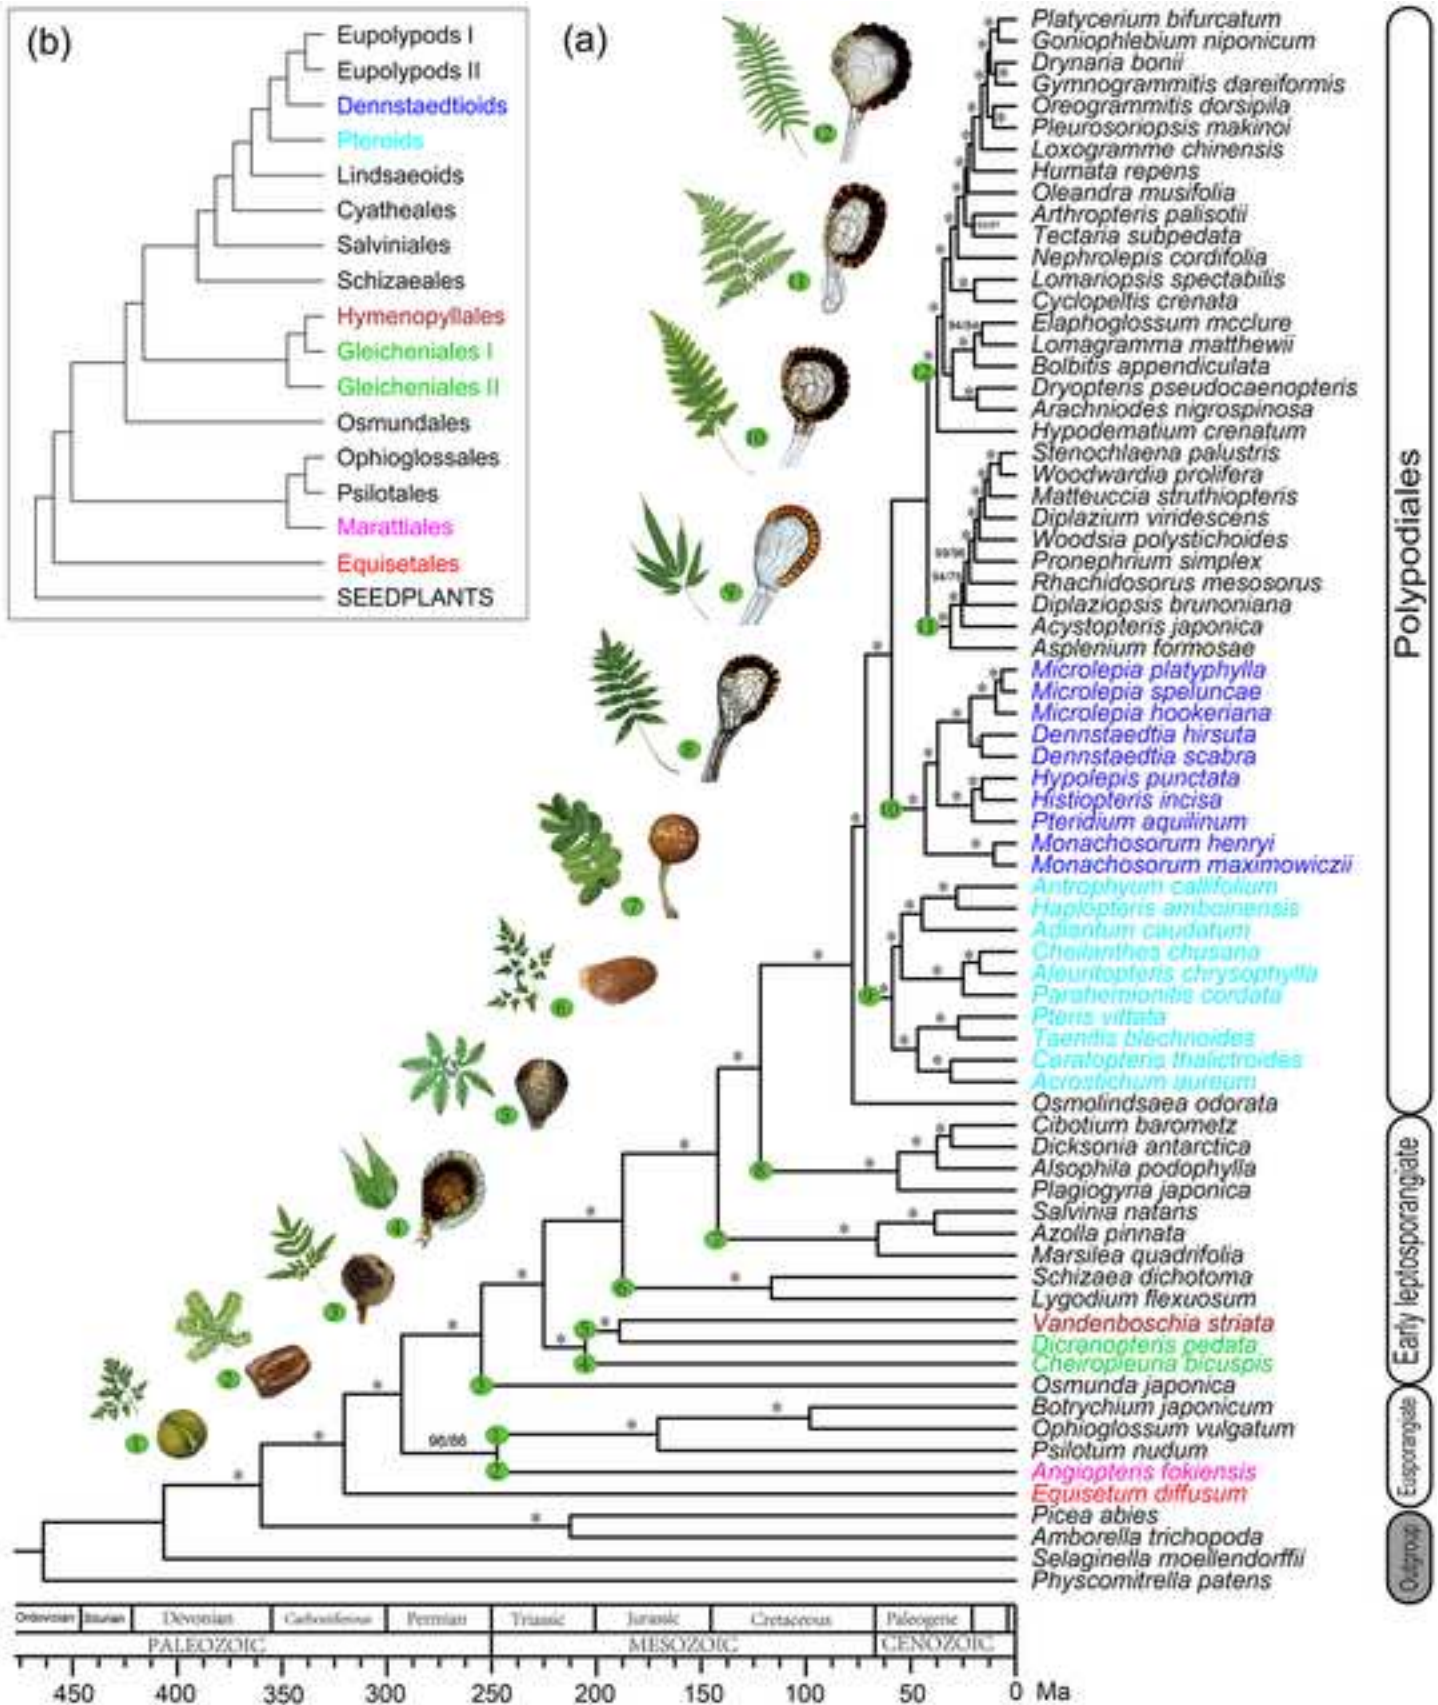





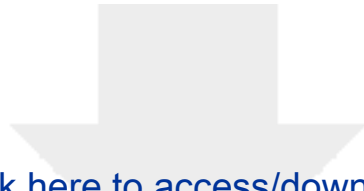

Click here to access/download  
**Supplementary Material**  
Supplementary information.docx

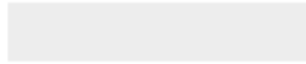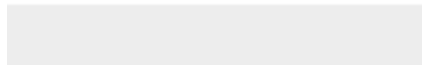

Yue-Hong Yan, Professor  
Shanghai Chenshan Plant Science Research Center,  
Chinese Academy of Sciences & Shanghai Chenshan Botanical Garden  
3888 Chenhua Road, Shanghai 201602, China  
Tel: +86-21-37792288-903; Fax: +86-21-67657811; email: yhyan@sibs.ac.cn  
July 7, 2017

Dear Editor for GigaScience:

We have revised a manuscript entitled “**Large scale phylogenomic analysis resolves a backbone phylogeny in ferns**” (formerly manuscript number: GIGA-D-17-00009) for your consideration to be published in **GigaScience**. The materials in the manuscript have not been published, nor are under consideration for publication elsewhere.

Ferns are the sister group of seed plants. However, the relationships among major fern lineages remain controversial. Here, we carried a large scale phylogenomic analysis using high-quality transcriptome sequencing data which covered 69 fern species from all the 11 orders. By comparing the cladograms yielded from various methods of species tree estimation, we obtained a robust fern phylogeny. Our results are interpreted with sporangia characters, and a new evolutionary route of sporangia in ferns are suggested. This backbone phylogeny in ferns sets a foundation for further studies in biology and evolution in ferns, and therefore in plants, especially when fern genomes are not available.

We have adopted all the suggestions in our revised manuscript. The major revisions include: 1 during species tree estimation, we applied both coalescent-based and concatenation-based methods to both nucleotides and amino acids sequences, and compared the results; 2 we used fossil records to estimate the divergence times; 3 before discussing the evolution of sporangia in ferns, we reconstruct the ancestral state of sporangium annulus; 4 we added a working flow diagram (Figure 2) to show the major processes of data production and analysis; 5 we deposited the datasets, trees, and scripts in open repositories, including GenBank, figshare, and github; 6 we improved our “tree thinking” and writing.

Thank you very much for handling our manuscript. I am looking forward to hearing your decision soon.

Sincerely yours,  
Yue-Hong Yan

## Response to the review comments:

**Reviewer #1:** Shen et al presented an impressive dataset on fern transcriptomes, and attempted to build a better backbone phylogeny of ferns. Despite that I believe the transcriptome data will be invaluable for the community, authors' phylogenetic analyses, and the interpretation of the results, are inadequate for publication. My major concerns are:

(1) The authors concatenated all the loci for phylogenetic reconstruction, a practice that has been shown prone to give high supports on wrong relationships. There are numerous simulation and empirical studies on the danger of data concatenation in phylogenomics.

Just name a few:

<http://currents.plos.org/treeoflife/article/concatenation-analyses-in-the-presence-of-incomplete-lineage-sorting/> and

<http://www.nature.com/nature/journal/v497/n7449/abs/nature12130.html>. Concatenation is particularly inappropriate when there are incomplete lineage sorting, and I believe some of the "novel" relationships the authors found may not be true, but due to the pitfalls of their phylogenetic methodology. The better approach would be to use multi-species coalescent method, like ASTRAL (Mirarab et al 2014 Bioinformatics 30: i541-i548).

**R:** We thank the reviewer for that these suggestions are very helpful. We have applied both coalescent-based and concatenation-based methods in species tree estimation in the revised manuscript (Line 303-312). The coalescent-based species tree was reconstructed by ASTRAL (v4.10.4) (Line 303-304). When nucleotide sequence is used, the cladograms yielded from coalescent-based and concatenation-based methods are highly consistent, except the location of *Angiopteris fokiensis* (Table 2, Line 531).

(2) The authors did not address how they deal with transcript isoforms from the Trinity output. When there are multiple isoforms, which one did you include in the alignment?

**R:** We thank the reviewer for the suggestion. In our pipeline, we used CD-HIT-EST (v4.6.1) to cluster contigs, followed by discard the duplicated sequences (Line 255-257). The modification has been incorporated in the revised version of the manuscript.

(3) I don't have the access to the alignments to assess the quality. And the alignment and tree files should be deposited in Dryad, TreeBase, or other open repositories.

**R:** We thank the reviewer for the suggestion. We have deposited the datasets in the open repository "Figshare" , including:

- The 4 alignment sets of single orthologous gene (including 2 matrices both in DNA and Protein sequences), available at <https://figshare.com/s/f835735cb66911ff1ffd>

The datasets for concatenation based phylogenetic tree, including:

- The 4 concatenation matrices (including 2 matrices both in DNA and Protein sequences);

- The results of model selection for Protein concatenation tree (We did not adopt partition method here, the model for each gene was the same; For DNA concatenation tree, the default model GTR +  $\Gamma_4$  + I was used);

- The 4 resulting concatenation tree files (inferred by 2 matrices both in DNA and Protein sequences).

These data are available at <https://figshare.com/s/8af236b660f61078e40b>.

For coalescent-based species tree, the deposited data including:

- The 4 single orthologous gene matrices sets (including 2 matrices both in DNA and Protein sequences);

- The best gene trees selected from the 100 replicated tree inferred by each gene matrices, which were used to calculate the topology of the consensus coalescent-based species tree;

- The 100 random gene trees of each gene matrices, which were used to calculate the bootstrap of the consensus coalescent-based species tree;

- The 4 coalescent-based species trees in newick format (inferred by 2 matrices both in DNA and Protein sequences).

These data are available at <https://figshare.com/s/e5e70c2fd3990e5176d8>.

(4) The authors do not have the correct "tree-thinking". The extant Equisetum is not more primitive/basal/earlier than say Polypodium. Their interpretation on annulus evolution also assumed a "ladderized" progression from Equisetales, Ophioglossales, Marattiales, Gleicheniales, Schizaeales, to others. But remember the trees can be freely rotated! If you want to make claims on the evolutionary "route", use fossils and/or character state reconstruction. Please refer to Stacey Smith and David Baum's Tree Thinking book, and also this blog post

<http://for-the-love-of-trees.blogspot.com/2016/09/the-ancestors-are-not-among-us.html>.

**R:** These suggestions are very helpful. We have referred to the literature which the reviewer suggested, and improved our "tree-thinking". We have removed words like "basal", "primitive" when we describe phylogenetic relationships and have used "sister to" instead. In the revised manuscript, to analyze the evolutionary route of sporangia annulus, we have used fossil records (Line 311-316, Figure 3) to estimate the divergence times, and applied character state reconstruction (Line 317-332, Figure 4).

(5) The authors also made too dramatic a claim that "deep relationships in fern phylogeny remain weakly supported and controversial" (line 60-61). Rothfels et al (2015 AJB 102: 1-19) already showed high supports for the relationships among Equisetales, Psilotales, Ophioglossales, Marattiales, and leptosporangiates.

**R:** Researches (Pryer et al. 2004, Smith et al. 2006, Rai and Graham 2010, Schneider 2013, Lu et al. 2015, Rothfels et al. 2015) have yielded conflicting cladograms among major lineages in ferns (Figure 1), despite that Rothfels et al (2015 AJB 102: 1-19) showed high supports for some deep relationships. In agree with the reviewer's opinion partially, we have changed the sentence as "some major relationships in fern phylogeny remain controversial" (Line 57-58).

(6) The writing needs to be tightened up a lot. There are many typos and awkward grammar.

**R:** We thank the reviewer for the suggestion. We have improved the writing and checked the grammar carefully.

In summary, I think this study by Shen et al lacks the rigor and to some extent the novelty, despite having generated this large amount of data. The authors should consider improving their phylogenetic methods, and rethink about what new insights can be generated from their dataset. Good luck : )

**R:** These suggestions are very helpful. In the revised manuscript, we have improved the phylogenetic methods greatly, such as to estimate species tree using both coalescent-based and concatenation-based methods; and to reconstruct character state of sporangium annulus; and improved our “tree thinking” also. We have found some new insights, such as that eusporangiate ferns except Equisetales form a monophyletic clade, and that Gleicheniaceae and Hymenophyllaceae form a monophyletic clade which is sister to Dipteridaceae.

**Reviewer #2:** I review the paper not as an expert in fern evolution but just to assess the appropriateness of the methodology and data reporting. The paper report on a concatenation analysis of transcriptomic data for 69 fern species. The problem addressed is interesting, and the dataset is large and promising. The language is mostly clear, although improvements are needed (examples of problematic sentences are shown in the attached file). The paper certainly has merit.

There are three issues with the current version of the manuscript. The first two issues have to be solved before the paper becomes suitable for publication at GigaScience. The third issue raised can be taken as a suggestion.

1- Reproducibility: A major premise of journals like GigaScience is that data and methods used should be made available. The authors have deposited transcriptomes to GenBank. But this is not nearly enough. They should also make available:

- Their ALIGNED orthologous gene sets
- Their filtered data (after GBlocks) in form of the concatenation matrix used.
- The results of model selection (I assume one model per gene, but this was not clear).

- Resulting trees, in newick or other machine-readable formats. Authors put some newick strings (I don't think for the main tree) in the supplement. This is not the most useful way to publish newick trees. Instead, they should be made available as files. Places like TreeBase and dryad can be used for depositing the trees.

**R:** We thank the reviewer for the suggestion. We have deposited the datasets in the open repository “Figshare” , including:

- The 4 alignment sets of single orthologous gene (including 2 matrices both in DNA and Protein sequences), available at <https://figshare.com/s/f835735cb66911ff1ffd>;

The datasets for concatenation based phylogenetic tree, including:

- The 4 concatenation matrices (including 2 matrices both in DNA and Protein sequences);

- The results of model selection for Protein concatenation tree (We did not adopt partition method here, the model for each gene was the same; For DNA concatenation tree, the default model  $GTR + \Gamma_4 + I$  was used);

- The 4 resulting concatenation tree files (inferred by 2 matrices in both DNA and Protein sequences).

These data are available at <https://figshare.com/s/8af236b660f61078e40b>.

For coalescent-based species tree, the deposited data include:

- The 4 single orthologous gene matrices sets (including 2 matrices in both DNA and Protein sequences);

- The best gene tree selected from 100 replicated trees which were inferred from each gene matrices. These best gene trees were used to calculate the topology of the consensus coalescent-based species tree;

- The 100 random gene trees from each gene matrices, which were used to calculate the bootstrap of the consensus coalescent-based species tree;

- The 4 coalescent-based species tree in newick format (inferred by 2 matrices in both DNA and Protein sequences).

These data are available at <https://figshare.com/s/e5e70c2fd3990e5176d8>.

In addition, the authors describe the methods but do not make any of their scripts available. Making those available would be important for reproducibility. At a minimum, the exact commands used for running various tools (e.g., MCL, Mafft, Trinity, RAxML, etc.) should be provided in the supplement. In absence of details I had to assume certain things. For example, it seemed like the analyses were partitioned, but details were not clear.

**R:** We thank the reviewer for the suggestion. We have deposit the scripts (including assembly, MCL, alignment, tree prune, matrix construction, RAxML, etc) in github ([https://github.com/shenhui0713/Paper-2017-Ferns\\_69.git](https://github.com/shenhui0713/Paper-2017-Ferns_69.git)) and Figshare (<https://figshare.com/s/b28085ee6a7b69f758e9>) with a description of each script.

2- It was not clear to me how the dataset was divided into primitive and derived taxa. The criteria should be described clearly. The abstract should not use these two terms assuming their meaning is clear to the reader. In general, calling taxa derived and primitive tends to be controversial (to say the least).

**R:** We thank the reviewer for the suggestion. In the revised manuscript, we did not divide the sampled species into primitive and derived taxa; instead, we have grouped the species as Eusporangiate, Early leptosporangiate, and Polypodiales according to the

phylogeny. Moreover, since words like primitive and derived taxa are not correct “tree thinking”, we have avoided using them in the revised version.

3- The methods used are OK, but do not include the types of species tree analyses that are the norm in modern phylogenomics. The authors have >1000 genes. They can estimate individual gene trees and then combine them using a summary method (e.g., NJst/ASTRID, ASTRAL, MP-EST, etc). This approach would provide an alternative analysis that can be compared with concatenation. The authors should feel free to argue in favor of one type of analysis over the other, but not doing any species tree analysis makes this into a paper that one would have expected to see 5 years ago but not now. At a minimum, the authors should discuss why they don't think a species tree method is needed or relevant.

**R:** We thank the reviewer for the suggestion. In this revised manuscript, we have applied both coalescent-based and concatenation-based methods in species tree estimation (Line 303-312). The coalescent-based species tree was reconstructed by ASTRAL (v4.10.4) (Line 303). We also compared the cladograms estimated by coalescent-based and concatenation-based methods (Table 2, Line 531).

**Reviewer #3:** In "Large scale phylogenomic analysis resolves a backbone phylogeny in ferns" Hui Shen and colleague collect RNA-seq data and perform phylogenetic analyses of a large group of ferns to address existing phylogenetic uncertainties.

As agreed by the editor, I am not qualified to assess the biological significance of the findings and accordingly my review will be limited to the technical aspects and the presentation.

Through the application of RNA-Seq, the authors estimate a comprehensive phylogenetic tree of 69 species of ferns covering the major groups, resolving some outstanding placement issues with sufficient confidence. Moreover, they utilize their newly obtained tree to revise the morphological evolution of sporangia, offering a novel hypothesis (this could be better reflected in the title). Overall, I found the study well design and conducted and a valuable addition. I offer some recommendations for some potential improvements below.

For their main result (the estimation of a robust phylogenetic backbone tree) the authors apply a multi-step process composed of sequencing QC, transcriptome assembly, orthology assignment and tree estimation by maximum likelihood from (translated) amino acid sequences. While these are pretty standard procedures, the description of the exact steps could be improved and their purpose more clearly stated: a flow diagram could greatly improve understanding. For example it is not clear which alignments are of nucleotides and which of proteins (eg. line 128 vs. 134). The code used for the various steps was not initially provided and was subsequently made available by the authors as a set of scripts. Some steps of the pipeline are however missing (removal of sequences of species with more than 10 sequences in a group, line 127; tree estimation within groups of

orthologues, line 130) and it is not obvious that the script 4\_Runall\_for\_multi\_alignment.pl is (probably) run also after

#2. Overall, these are documentation problems rather than methodological issues and the approach used in this study is sufficiently robust and appropriate. The strong bootstrap support and the topological consistency validate the chosen approach. As mentioned above, more detailed explanations (possibly along with a flow diagram) would help clarify the matter.

**R:** We thank the reviewer for the comments and suggestions.

- We have added a flow diagram as **Figure 2** to show the major processes and methods in this study.
- For the missing step of “removal of sequences of species with more than 10 sequences in a group” in the pipeline, we have added a new script named “3\_Runall\_for\_mci\_result\_analysis.pl” which is run for the masking of the resulting homologous gene families obtained by MCL. Within this script, lines 49-53 are coded for “removal of sequences of species with more than 10 sequences in a group”.
- For the missing step of “tree estimation within groups of orthologues”, we have added a new script named “5\_Runall\_for\_raxml.pl”, which is run for construction of Raxml tree of each homologous gene family using protein sequence.
- For the “script 4\_Runall\_for\_multi\_alignment.pl”, we have renumbered this script as “script 7\_Runall\_for\_multi\_alignment.pl”, it could run together with the newly provided script “3\_Runall\_for\_mci\_result\_analysis.pl”, “4\_Runall\_for\_alignment.pl” and “pal2nal.v14 (Open Source Software)”, all these scripts have been deposited in github ([https://github.com/shenhui0713/Paper-2017-Ferns\\_69.git](https://github.com/shenhui0713/Paper-2017-Ferns_69.git)) and Figshare (<https://figshare.com/s/b28085ee6a7b69f758e9>)

Another aspect that needs some more clarification is the purpose and appropriateness of the approximate unbiased (AU) test.

**R:** We thank the reviewer for the comments. As we have applied both coalescent-based and concatenation-based methods to both nucleotides and amino acids sequences in species tree estimation, and have compared the four resulting cladograms (Table 2, Line 531); the AU test seems not necessary, and has been removed from the revised manuscript.

Below, I offer some recommendations that could make the paper more accessible to non-experts in the field of fern phylogeny and evolution.

Generally, the authors do a good job at introducing the uncertainties in fern phylogeny that they wish to address, however the usage of common names should be moved to the introduction, rather than being left to the Discussion. Similarly, for the non-expert, it is necessary to specify which species belong to which group (Family/Order), either as part of Table 1 and/or as part of Figure 2.

**R:** Thanks for the suggestions. Since only a few species have common names and they



were not referred to in the introduction, we have removed the common names from the revised manuscript. In order to help the readers find the Order/group to which a certain species belongs, we have color the species names in Figure 3(a) the same as their correspondence groups in Figure 3(b).

However, much of the focus of the study is devoted to addressing the evolution of sporangia given the newly obtained phylogeny. As a new evolutionary pathway is proposed as an important novel result, I suggest introducing the current view in the Introduction, possibly with a diagram (similar to Figure 3), rather than scattered in the Discussion section. I understand that the current phylogeny is (or historically has been) informed by the morphology of the sporangium, therefore being able to map the morphology on an independently obtained phylogeny is a major advancement.

It's surprising that one species (*Cyclopeltis crenata*) only had 23% coverage of its BUSCO set, compared with most of the others above 90%. This observation, its causes and its potential consequences are not addressed in the text.

**R:** We thank the reviewer for the comment. We have perform an analysis to assess the potential affection caused by the relative lower assembly quality of *Cyclopeltis crenata*. A RAxML tree was constructed using concatenation method, with the matrix that excluded all the gene sequence of *Cyclopeltis crenata*. We compared the obtained topology with our main tree results, and found no difference. This result implied that the low coverage of BUSCO in the sample *Cyclopeltis crenata* does not affect our main phylogeny conclusion. In addition, it seems that the orthologous gene presented in *Cyclopeltis crenata* is not deceased even the lower assembly quality: 2146 in the matrix 1, 2391 in total; 1279 in the matrix 2, 1334 in total.

My major issue is with Figure 2, which is the centerpiece of the study. In its current form it is underwhelming and I strongly recommend improving the figure and especially the legend. The phylogram should definitely include the group membership of the various species (possibly currently indicated by the A-D and I-IV markings on the side, but not explained) and the legend should explain the changes in sporangium.

**R:** We thank the reviewer for the comments. We have revised Figure 3 (formerly Figure 2), such as marking the group names on the side of the species names, and adding the time scale. The change of sporangia and their annulus are explained in Figure 4 and the main text (Line 216-228) in the revised manuscript.

Finally, I would strongly urge the authors to deposit the tree and the underlying matrices to a domain specific repository like TreeBASE (<https://treebase.org>) and/or OpenTreeOfLife (<https://tree.opentreeoflife.org/about/open-tree-of-life>).

**R:** We thank the reviewer for the comments. We have deposited the trees and the underlying datasets in the open repository "Figshare" , including:

- The 4 alignment sets of single orthologous gene (including 2 matrices both in DNA and Protein sequences), available at <https://figshare.com/s/f835735cb66911ff1ffd>
- The datasets for concatenation based phylogenetic tree, including:
  - The 4 concatenation matrices (including 2 matrices both in DNA and Protein sequences);
  - The results of model selection for Protein concatenation tree (We did not adopt partition method here, the model for each gene was the same; For DNA concatenation tree, the default model  $GTR + \Gamma_4 + I$  was used);
  - The 4 resulting concatenation tree files (inferred by 2 matrices both in DNA and Protein sequences).
- These data are available at <https://figshare.com/s/8af236b660f61078e40b>.
- For coalescent-based species tree, the deposited data including:
  - The 4 single orthologous gene matrices sets (including 2 matrices both in DNA and Protein sequences);
  - The best gene trees selected from the 100 replicated tree inferred by each gene matrices, which were used to calculate the topology of the consensus coalescent-based species tree;
  - The 100 random gene trees of each gene matrices, which were used to calculate the bootstrap of the consensus coalescent-based species tree;
  - The 4 coalescent-based species trees in newick format (inferred by 2 matrices both in DNA and Protein sequences).
- These data are available at <https://figshare.com/s/e5e70c2fd3990e5176d8>.
- Moreover, we have deposit the scripts (including assembly, MCL, alignment, tree prune, matrix construction, RAxML, etc) in github ([https://github.com/shenhui0713/Paper-2017-Ferns\\_69.git](https://github.com/shenhui0713/Paper-2017-Ferns_69.git)) and Figshare (<https://figshare.com/s/b28085ee6a7b69f758e9>) with a description of each script.

#### Other minor points

"basing on" should be replaced with "based on" throughout.

I. 51: "phylogenetic studies in ferns"

I. 52: "our understanding of fern evolution"

The sentence in lines 69-70 should be removed as it's factually incorrect.

I. 61: PPG is only spelled out in I. 200

I. 81: "cornerstone of fern phylogeny"

II. 83-85: unclear what is meant by "A natural framework"

I. 148: a reference to "hypothesis\_tree.doc file" is not clear.

II. 159-160 ("together with..."): incomplete sentence.

I. 182-183: "which is adapted" seems to refer to the AU test, rather than the five topologies.

I. 235: "In agreement [...] Eupolypods consist"

**R:** We thank the reviewer for the comments. We have revised these inappropriate words/sentences mentioned above, and checked the grammar all over the revised manuscript carefully.
