# Supplementary material for: Large-scale phylogenomic analysis resolves a backbone phylogeny in ferns
Source: PubMed Central journal article supplement (PMC5795342; doi:10.1093/gigascience/gix116), 2017-11-24
Supplement: gix116_giga-d-17-00169_revision-1.pdf [file gix116_giga-d-17-00169_revision-1.pdf]

|                                                      |                                                                                                                                                                                                                                                                                                                                                                                                                                                                                                                                                                                                                                                                                                                                                                                                                                                                                                                                                                                                                                                                                                                                                                                                                                                                                                                                                                                                                                                                                                                                                                                                                                                                                                                                                                                        |                        |
|------------------------------------------------------|----------------------------------------------------------------------------------------------------------------------------------------------------------------------------------------------------------------------------------------------------------------------------------------------------------------------------------------------------------------------------------------------------------------------------------------------------------------------------------------------------------------------------------------------------------------------------------------------------------------------------------------------------------------------------------------------------------------------------------------------------------------------------------------------------------------------------------------------------------------------------------------------------------------------------------------------------------------------------------------------------------------------------------------------------------------------------------------------------------------------------------------------------------------------------------------------------------------------------------------------------------------------------------------------------------------------------------------------------------------------------------------------------------------------------------------------------------------------------------------------------------------------------------------------------------------------------------------------------------------------------------------------------------------------------------------------------------------------------------------------------------------------------------------|------------------------|
| <b>Manuscript Number:</b>                            | GIGA-D-17-00169R1                                                                                                                                                                                                                                                                                                                                                                                                                                                                                                                                                                                                                                                                                                                                                                                                                                                                                                                                                                                                                                                                                                                                                                                                                                                                                                                                                                                                                                                                                                                                                                                                                                                                                                                                                                      |                        |
| <b>Full Title:</b>                                   | Large scale phylogenomic analysis resolves a backbone phylogeny in ferns                                                                                                                                                                                                                                                                                                                                                                                                                                                                                                                                                                                                                                                                                                                                                                                                                                                                                                                                                                                                                                                                                                                                                                                                                                                                                                                                                                                                                                                                                                                                                                                                                                                                                                               |                        |
| <b>Article Type:</b>                                 | Research                                                                                                                                                                                                                                                                                                                                                                                                                                                                                                                                                                                                                                                                                                                                                                                                                                                                                                                                                                                                                                                                                                                                                                                                                                                                                                                                                                                                                                                                                                                                                                                                                                                                                                                                                                               |                        |
| <b>Funding Information:</b>                          | Shanghai Landscaping & City Appearance Administrative Bureau of China (F132421)                                                                                                                                                                                                                                                                                                                                                                                                                                                                                                                                                                                                                                                                                                                                                                                                                                                                                                                                                                                                                                                                                                                                                                                                                                                                                                                                                                                                                                                                                                                                                                                                                                                                                                        | Proffesor Yue-Hong Yan |
|                                                      | Shanghai Landscaping & City Appearance Administrative Bureau of China (F112422)                                                                                                                                                                                                                                                                                                                                                                                                                                                                                                                                                                                                                                                                                                                                                                                                                                                                                                                                                                                                                                                                                                                                                                                                                                                                                                                                                                                                                                                                                                                                                                                                                                                                                                        | Proffesor Yue-Hong Yan |
|                                                      | National Natural Science Foundation of China (31370234)                                                                                                                                                                                                                                                                                                                                                                                                                                                                                                                                                                                                                                                                                                                                                                                                                                                                                                                                                                                                                                                                                                                                                                                                                                                                                                                                                                                                                                                                                                                                                                                                                                                                                                                                | Proffesor Yue-Hong Yan |
| <b>Abstract:</b>                                     | <p>Background: Ferns, originated about 360 million years ago, are the sister group of seed plants. Despite the remarkable progress in our understanding of fern phylogeny, with conflicting molecular evidences and different morphological interpretations, relationships among major fern lineages remain controversial.</p> <p>Results: With the aim to obtain a robust fern phylogeny, we carried a large scale phylogenomic analysis using high-quality transcriptome sequencing data which covered 69 fern species from 38 families and 11 orders. Both coalescent-based and concatenation-based methods were applied to both nucleotides and amino acids sequences in species tree estimation. Among the mainly consistent and strongly supported topologies, topologies yielded from applying coalescent-based method and concatenation-based method, respectively, to nucleotides sequence are congruent except one position.</p> <p>Conclusions: Our result confirmed that Equisetales is sister to the rest of ferns, and Dennstaedtiaceae is sister to eupolypods. Moreover, our result strongly supported some relationships different from the current view of fern phylogeny, including that Marattiaceae may be sister to the monophyletic clade of Psilotaceae and Ophioglossaceae; Gleicheniaceae and Hymenophyllaceae form a monophyletic clade which is sister to Dipteridaceae; and that Aspleniaceae is sister to the rest groups in eupolypods II. These results were interpreted with morphological traits, especially sporangia characters, and a new evolutionary route of sporangial annulus in ferns was suggested. This backbone phylogeny in ferns sets a foundation for further studies in biology and evolution in ferns, and therefore in plants.</p> |                        |
| <b>Corresponding Author:</b>                         | Yue-Hong Yan, Ph.D<br>Shanghai Chenshan Botanical Garden<br>Shanghai, CHINA                                                                                                                                                                                                                                                                                                                                                                                                                                                                                                                                                                                                                                                                                                                                                                                                                                                                                                                                                                                                                                                                                                                                                                                                                                                                                                                                                                                                                                                                                                                                                                                                                                                                                                            |                        |
| <b>Corresponding Author Secondary Information:</b>   |                                                                                                                                                                                                                                                                                                                                                                                                                                                                                                                                                                                                                                                                                                                                                                                                                                                                                                                                                                                                                                                                                                                                                                                                                                                                                                                                                                                                                                                                                                                                                                                                                                                                                                                                                                                        |                        |
| <b>Corresponding Author's Institution:</b>           | Shanghai Chenshan Botanical Garden                                                                                                                                                                                                                                                                                                                                                                                                                                                                                                                                                                                                                                                                                                                                                                                                                                                                                                                                                                                                                                                                                                                                                                                                                                                                                                                                                                                                                                                                                                                                                                                                                                                                                                                                                     |                        |
| <b>Corresponding Author's Secondary Institution:</b> |                                                                                                                                                                                                                                                                                                                                                                                                                                                                                                                                                                                                                                                                                                                                                                                                                                                                                                                                                                                                                                                                                                                                                                                                                                                                                                                                                                                                                                                                                                                                                                                                                                                                                                                                                                                        |                        |
| <b>First Author:</b>                                 | Hui Shen, PhD                                                                                                                                                                                                                                                                                                                                                                                                                                                                                                                                                                                                                                                                                                                                                                                                                                                                                                                                                                                                                                                                                                                                                                                                                                                                                                                                                                                                                                                                                                                                                                                                                                                                                                                                                                          |                        |
| <b>First Author Secondary Information:</b>           |                                                                                                                                                                                                                                                                                                                                                                                                                                                                                                                                                                                                                                                                                                                                                                                                                                                                                                                                                                                                                                                                                                                                                                                                                                                                                                                                                                                                                                                                                                                                                                                                                                                                                                                                                                                        |                        |
| <b>Order of Authors:</b>                             | Hui Shen, PhD                                                                                                                                                                                                                                                                                                                                                                                                                                                                                                                                                                                                                                                                                                                                                                                                                                                                                                                                                                                                                                                                                                                                                                                                                                                                                                                                                                                                                                                                                                                                                                                                                                                                                                                                                                          |                        |
|                                                      | Dongmei Jin, PhD                                                                                                                                                                                                                                                                                                                                                                                                                                                                                                                                                                                                                                                                                                                                                                                                                                                                                                                                                                                                                                                                                                                                                                                                                                                                                                                                                                                                                                                                                                                                                                                                                                                                                                                                                                       |                        |
|                                                      | Jiang-Ping Shu                                                                                                                                                                                                                                                                                                                                                                                                                                                                                                                                                                                                                                                                                                                                                                                                                                                                                                                                                                                                                                                                                                                                                                                                                                                                                                                                                                                                                                                                                                                                                                                                                                                                                                                                                                         |                        |
|                                                      | Xi-Le Zhou                                                                                                                                                                                                                                                                                                                                                                                                                                                                                                                                                                                                                                                                                                                                                                                                                                                                                                                                                                                                                                                                                                                                                                                                                                                                                                                                                                                                                                                                                                                                                                                                                                                                                                                                                                             |                        |
|                                                      | Ming Lei, PhD                                                                                                                                                                                                                                                                                                                                                                                                                                                                                                                                                                                                                                                                                                                                                                                                                                                                                                                                                                                                                                                                                                                                                                                                                                                                                                                                                                                                                                                                                                                                                                                                                                                                                                                                                                          |                        |

|                                                |                                                                                                                                                                                                                                                                                                                                                                                                                                                                                                                                                                                                                                                                                                                                                                                                                                                                                                                                                                                                                                                                                                                                                                                                                                                                                                                                                                                                                                                                                                                                                                                                                                                                                                                                                                                                                                                                                                                                                                                                                                                                                                                                                                                                                                                                                                                                                                                                                                                                                                                                                                                 |
|------------------------------------------------|---------------------------------------------------------------------------------------------------------------------------------------------------------------------------------------------------------------------------------------------------------------------------------------------------------------------------------------------------------------------------------------------------------------------------------------------------------------------------------------------------------------------------------------------------------------------------------------------------------------------------------------------------------------------------------------------------------------------------------------------------------------------------------------------------------------------------------------------------------------------------------------------------------------------------------------------------------------------------------------------------------------------------------------------------------------------------------------------------------------------------------------------------------------------------------------------------------------------------------------------------------------------------------------------------------------------------------------------------------------------------------------------------------------------------------------------------------------------------------------------------------------------------------------------------------------------------------------------------------------------------------------------------------------------------------------------------------------------------------------------------------------------------------------------------------------------------------------------------------------------------------------------------------------------------------------------------------------------------------------------------------------------------------------------------------------------------------------------------------------------------------------------------------------------------------------------------------------------------------------------------------------------------------------------------------------------------------------------------------------------------------------------------------------------------------------------------------------------------------------------------------------------------------------------------------------------------------|
|                                                | Ran Wei, PhD                                                                                                                                                                                                                                                                                                                                                                                                                                                                                                                                                                                                                                                                                                                                                                                                                                                                                                                                                                                                                                                                                                                                                                                                                                                                                                                                                                                                                                                                                                                                                                                                                                                                                                                                                                                                                                                                                                                                                                                                                                                                                                                                                                                                                                                                                                                                                                                                                                                                                                                                                                    |
|                                                | Hui Shang                                                                                                                                                                                                                                                                                                                                                                                                                                                                                                                                                                                                                                                                                                                                                                                                                                                                                                                                                                                                                                                                                                                                                                                                                                                                                                                                                                                                                                                                                                                                                                                                                                                                                                                                                                                                                                                                                                                                                                                                                                                                                                                                                                                                                                                                                                                                                                                                                                                                                                                                                                       |
|                                                | Hong-Jin Wei                                                                                                                                                                                                                                                                                                                                                                                                                                                                                                                                                                                                                                                                                                                                                                                                                                                                                                                                                                                                                                                                                                                                                                                                                                                                                                                                                                                                                                                                                                                                                                                                                                                                                                                                                                                                                                                                                                                                                                                                                                                                                                                                                                                                                                                                                                                                                                                                                                                                                                                                                                    |
|                                                | Rui Zhang, PhD                                                                                                                                                                                                                                                                                                                                                                                                                                                                                                                                                                                                                                                                                                                                                                                                                                                                                                                                                                                                                                                                                                                                                                                                                                                                                                                                                                                                                                                                                                                                                                                                                                                                                                                                                                                                                                                                                                                                                                                                                                                                                                                                                                                                                                                                                                                                                                                                                                                                                                                                                                  |
|                                                | Li Liu                                                                                                                                                                                                                                                                                                                                                                                                                                                                                                                                                                                                                                                                                                                                                                                                                                                                                                                                                                                                                                                                                                                                                                                                                                                                                                                                                                                                                                                                                                                                                                                                                                                                                                                                                                                                                                                                                                                                                                                                                                                                                                                                                                                                                                                                                                                                                                                                                                                                                                                                                                          |
|                                                | Yu_feng Gu                                                                                                                                                                                                                                                                                                                                                                                                                                                                                                                                                                                                                                                                                                                                                                                                                                                                                                                                                                                                                                                                                                                                                                                                                                                                                                                                                                                                                                                                                                                                                                                                                                                                                                                                                                                                                                                                                                                                                                                                                                                                                                                                                                                                                                                                                                                                                                                                                                                                                                                                                                      |
|                                                | Xian-Chun Zhang, PhD                                                                                                                                                                                                                                                                                                                                                                                                                                                                                                                                                                                                                                                                                                                                                                                                                                                                                                                                                                                                                                                                                                                                                                                                                                                                                                                                                                                                                                                                                                                                                                                                                                                                                                                                                                                                                                                                                                                                                                                                                                                                                                                                                                                                                                                                                                                                                                                                                                                                                                                                                            |
|                                                | Yue-Hong Yan, Ph.D                                                                                                                                                                                                                                                                                                                                                                                                                                                                                                                                                                                                                                                                                                                                                                                                                                                                                                                                                                                                                                                                                                                                                                                                                                                                                                                                                                                                                                                                                                                                                                                                                                                                                                                                                                                                                                                                                                                                                                                                                                                                                                                                                                                                                                                                                                                                                                                                                                                                                                                                                              |
| <b>Order of Authors Secondary Information:</b> |                                                                                                                                                                                                                                                                                                                                                                                                                                                                                                                                                                                                                                                                                                                                                                                                                                                                                                                                                                                                                                                                                                                                                                                                                                                                                                                                                                                                                                                                                                                                                                                                                                                                                                                                                                                                                                                                                                                                                                                                                                                                                                                                                                                                                                                                                                                                                                                                                                                                                                                                                                                 |
| <b>Response to Reviewers:</b>                  | <p>Reviewer #1:</p> <p>page 3, line 60, change "basing on" to "based on"<br/>R: "Basing on" has been changed to "based on" as suggested (page 3, line 61).</p> <p>page 4, line 66, change "basing on" to "based on", and change "analysis" to "analyses"<br/>R: "Basing on" has been changed to "based on", "analysis" has been changed to "analyses"<br/>(page 4, line 67).</p> <p>page 4, line 74, change "close" to "closely"<br/>R: "Close" has been changed to "closely" (page 4 line 77).</p> <p>page 5, line 91, change "Schezaeles" to "Schizaeales"<br/>R: "Schezaeles" has been changed to "Schizaeales" (page 5, line 92).</p> <p>page 5, line 101, change "Genbank" to "NCBI"<br/>R: "Genbank" has been changed to "NCBI" (page 5, line 102).</p> <p>page 5, line 103, change "filtration" to "filtering"<br/>R: "Filtration" has been changed to "filtering" (page5, line 104).</p> <p>page 5, line 107, change "lineage" to "lineages"<br/>R: "Lineage" has been changed to "lineages" (page5, line 108).</p> <p>page 6, line 127-130, suggested wording: "For each combination of reconstruction methods (coalescent-based or concatenation-based) and sequence types (nucleotides or amino acids), Matrix 1 and Matrix 2 always yielded the same topology. In general, the four cladograms (Figure 3, Figure S1, S2, S3) from a combination of methods and sequence types are consistent except six positions (Table 2)."<br/>R: It has been changed as suggested (page 6, line 127-131), thank you.</p> <p>page 6, line 130-132, what do you mean by "most agreed"?<br/>R: This sentence has been changed as "Among the topologies, the one estimated by applying coalescent-based method to nucleotide sequence (Figure 3) and the one applying concatenation-based method (Figure S2) are most congruent"(page 6, line 131-133).</p> <p>page 6, line 133, change "evolution" to "evolutionary"<br/>R: "Evolution" has been changed to "evolutionary" (page 6, line 134).</p> <p>page 7, line 149, change "among close related taxa" to "at shallow phylogenetic scale"<br/>R: It has been changed as suggested (page 6, line 150), thank you.</p> <p>page 7, line 152-154, suggested wording: "..., and are often the controversial nodes from past studies based on different genes, we suggest such inconsistency might be caused partially by LIS and reticulate evolution."<br/>R: It has been changed as suggested (page 7, line 153-154), thank you.</p> <p>page 8, line 158-159, Rothfels et al (2015) is not the first to report Equisetum being</p> |

sister to the rest. See Rai and Graham (2010, AJB), and Kuo et al (2011, MPE). Also change "basing" to "based"

R: It has been changed as "This topology confirmed the results reported by Rai & Graham [12], and Kuo et al. [33] based on plastid genes, and has been accepted by the PPG I [3] in 2016" (page 8, line 158-160).

page 8, line 172, change "view of mainstream" to "mainstream"

R: "View of mainstream" has been changed to "mainstream" (page 8, line 175).

page 9, line 179, no need to say "forking ferns" and "filmy ferns" again here.

R: "Forking ferns" and "filmy ferns" have been deleted here, thank you (page 9, line 182).

page 9, line 181, change "Differently" to "On the other hand"

R: "Differently" has been changed to "On the other hand" (page 9, line 184).

page 9, line 185, change "may form a sister lineage to" to "may be sister to"

R: "May form a sister lineage to" has been changed to "may be sister to" (page 9, line 187).

page 9, line 186, change "the Gleicheniales order" to "Gleicheniales"

R: "The Gleicheniales order" has been changed to "Gleicheniales" (page 9, line 189).

page 9, line 195, remove "the disputation of inner"

R: "The disputation of inner" has been removed (page 9, line 197).

page 9, line 200, change "in agree with" to "in agreement with", and references are needed for this sentence.

R: It has been changed as "Our results showed that eupolypods are divided into two major lineages, eupolypods I and eupolypods II in agreement with the consensus opinion [3]" (page 10, line 201-202).

page 10, line 202, change "new" to "different"

R: "New to" has been changed to "different from" (page 10, line 204).

page 10, line 206, both "phylogram" and "cladogram" are used in this manuscript, and in a seemingly interchangeable way. I'd prefer "topology".

R: Both "phylogram" and "cladogram" have been changed to "topology" in this manuscript. Thank you. (e.g., page 10, line 208).

page 10, line 208, change "more close to" to "more closely related to"

R: "More close to" has been changed to "more closely related to" (Page 10, line 210).

page 10, line 206-216, NO MORE USE OF "PRIMITIVE"!!! Everything extant is equally "advanced".

R: Although extant species are equally "advanced", their characters can be "primitive", "original", or "derived". This sentence has been changed as "In Pteridaceae, the unstable structure of spherical sporangia, including variable annulus and short sporangial stalk, indicates these characters of sporangia are relatively original and are close to those with oblique annulus in early leptosporangiate. We also noticed that the characters of spherical sporangia with slightly oblique annulus in Monachosorum should be more primitive than the flattened sporangia with typical vertical annulus in other genera of Dennstaedtiaceae" (page 10, line 211-216).

page 10-11, "The evolution of sporangia annulus in ferns". I'm still having trouble understanding how the authors deduce the "routes" of annulus evolution. The "two subroutes" is particularly confusing - it would only make sense if Schizaeales and Salviniales are monophyletic, which they are not. And again, the ladderized thinking - with Polypodiales having the advanced, final states while the others being the primitive intermediates - is not correct.

R: Thanks to your advice. In the former manuscript, the "two subroutes" was indeed incongruent with the reconstructed evolutionary history of sporangia annulus in ferns as in Figure 4. We have re- interpreted the evolutionary history and avoided the "ladderized thinking".

This paragraph has been changed as "By observing the character of sporangial annulus of abundant samples in each fern group, and combining these characters with our well-resolved backbone phylogeny (Figure 3), we reconstructed the evolutionary history of sporangial annulus in ferns (Figure 4). According to the results, we infer that ex-annulus sporangia, as in Equisetaceae, Psilotaceae, and Ophioglossaceae, is the ancient state in ferns; rudimentary multiseriate annulus, which is inverse U-shaped in Marattiaceae, and U-shaped in Osmundaceae; equatorial transverse-oblique uniseriate annulus, as in Gleicheniaceae and Hymenophyllaceae; oblique annulus as in Cyatheaales (tree ferns), and vertical annulus as synapomorphy in polypods, have been derived from the ex-annulus state. Both Apical annulus as in Lygodium and Schizaea, and vestige or disappeared annulus as in Salviniales (aquatic ferns) are likely to be specialized in parallel from oblique annulus" (page 11, line 220-231).

page 11, the monophyly of eusporangiate ferns is highlighted in Conclusion, but this is also one of the inconsistent relationship between the ASTRAL and concatenation analyses. I suggest perhaps discuss the incongruence and potential pitfalls in phylotranscriptomics instead.

R: Since the monophyly of eusporangiate ferns are supported by coalescent-based method, but not by concatenation-based method, here we only say that the monophyly of eusporangiate ferns is possible in both the abstract (page 2, line 30-31) and the conclusion (page 11, line 240-242). In discussion, we say "The incongruence between the results based on coalescent and concatenation methods may be caused by strong ILS effect, which is a main pitfall when using concatenation method [21]"(page 8, line 168-171).

page 14, line 312, there are way more fossils that can be used as calibrations. Why only included two?

R: Fossil ages reflect the minimum times of divergence, which is more recent than the true divergence time. Given the small possibility in finding the earliest fossil for a lineage, and the difficulties in fossil species identification and correct dating, perfect fossils for calibration are rarely available. It is not always better to use more fossil dates as calibrations in estimation the divergence times for a phylogeny. Here we use two fossils (Archaeocalamites Senftenbergia: 354 MY, Grammatopteris: 280 MY) as the minimum ages of monilophytes and leptosporangiate ferns, which are relatively high in quality. When we use 8 fossil dates in calibration, the result did not improved remarkably.

change "sporangia annulus to "sporangial annulus"

R: "sporangia annulus" has been changed to "sporangial annulus" in this manuscript, thank you.

Reviewer #2: The revised manuscript deals with and addresses many of the methodological comments from the previous reviews. Importantly, data and scripts are all deposited on FigShare and can be accessed. They have also added summary methods in addition to their concatenation analyses before.

My remaining concerns about this manuscript are mostly related to individual sentences. These need to be revised for improved accuracy, clarity, or both.

Minor comments:

1- Page 4: " Moreover, due to the fact that amino-acid sequence is more conserved than nucleotide sequence, it may be more suited to estimate relationships among distant taxa. "

- The main issue with nucleotides is the fact that they tend to have compositional bias, especially in the third codon position. The discussions about what form of data is suited for "distant" or "recent" taxa is a bit hand-wavy, and in my view, misplaced. The important distinction between AA and nucleotide data is model fit.

R: We agree with your comment, and thanks for pointing out our misunderstanding. We have deleted this sentence in our revised manuscript, and made an careful interpretation about the advantage and disadvantage for protein and DNA data in phylogeny: "Nucleotide sequence, with higher variability than amino acid sequence, usually brings more useful information in phylogeny reconstruction, especially for closely related taxa. However, the compositional bias in nucleotide sequence, especially in the third codon position, may lead to a deviation from the true phylogeny.

Here, both nucleotide and amino-acid sequences are used in phylogeny reconstruction" (page 4, line 73-78).

2. Calling parts of the tree "sites" is rather confusing. Sites typically are used for alignments. I would use another term (e.g., parts, areas, relationships, etc.).

R: "Sites" has been changed to "positions" in the revised manuscript (e.g. page 6, line 131).

3. Why authors keep referring to their estimated phylogenetic trees as cladograms and/or phylogram is unclear and non-standard. Why not just call them phylogenetic trees?

R: "Cladograms" and "phylogram" were used in the former manuscript to infer the phylogenetic trees without time calibration, they have been changed to "topology" instead (e.g. page 6, line 129).

4. Page 6: "Among the cladograms, the one estimated by applying coalescent-based method to nucleotide sequences (Figure 3) is the most agreed."

- I have no idea what this sentence means. What does it mean to say a tree is most agreed? Agreed with what?

- Also, if the authors clarify what they mean, still, whether agreement between different analyses using the same tool means anything is not clear. That ASTRAL trees are more consistent among different analyses does not indicate higher quality of ASTRAL trees, and the authors should not imply that.

R: Thank you for the comments. "Most agreed" was to say that "the topology estimated by applying coalescent-based method to nucleotide sequences (Figure 3) is more consistent among different analyses". Since we have no evidence that the topology estimated by applying coalescent-based method to nucleotide sequences (Figure 3) is necessarily more reliable than the one estimated by applying concatenation-based method, we have changed this sentence as "Among the topologies, the one estimated by applying coalescent-based method to nucleotide sequence (Figure 3) and the one applying concatenation-based method (Figure S2) are most congruent" (page 6, line 131-133).

5. Page 13: "To reduce the complexity of each group, we removed all sequences of the species that had more than 10 sequences in this group. "

- Again, it's not clear what is meant by "complexity" here. Phylogenetic analyses greatly benefit from increased taxon sampling, and if the authors have completely removed taxa from their analyses, that is not a good practice. The only justified reason I can think of is that with extra sequences, analyses would be infeasible computationally.

R: The de novo assembly by trinity results in many sequences with high similarity, which includes both paralogs and isoforms (Haas, 2013). The complexity mentioned here meant that if a clustered gene family contains too many sequences (eg. more than 10), the risk of contamination of isoforms instead of true paralogs will be raised. In addition, as commented by the reviewer, it is indeed infeasible computationally when the sequence number grows larger, since phylogeny trees are built for each gene family. Concerning the taxa number, the reviewer worried that if we remove all the sequence from the taxa in the gene family will reduce the taxa number in use. We set the threshold value for taxa cover degree that is 75% and 90%, so this process will not influence taxon sampling.

The de novo assembly by trinity produces many sequences with high similarity, which includes both paralogs and isoforms (Haas, 2013). The complexity mentioned here meant that if a clustered gene family contains too many sequences (eg. more than 10), the risk of contamination of isoforms instead of true paralogs will be raised. In addition, as commented by the reviewer, it is indeed infeasible computationally when the sequence number grows larger, since phylogeny trees are built for each gene family.

Concerning the taxa number, the reviewer worried that if we remove all the sequence from the taxa in the gene family will reduce the taxa number in use. We set the threshold value for taxa coverage that is 75% and 90%, so this process will not influence taxon sampling.

This paragraph has been changed as "As the de novo assembly by Trinity produces many sequences with high similarity, which contain both paralogs and isoforms [47], when a clustered gene family contains too many sequences (eg. more than 10), the risk of contamination of isoforms rises, along with the computational infeasibility.

|                                                                                                                                                                                                                                                                                                                                                                                                                                                                                                             |                                                                                                                                                                                                                                                                                                                                                                                                                                                                                                                                                                                                                                                                                                                                                                                                                                                                                                                                                                                                                                                                                                                                                                                                                                                                                                                 |
|-------------------------------------------------------------------------------------------------------------------------------------------------------------------------------------------------------------------------------------------------------------------------------------------------------------------------------------------------------------------------------------------------------------------------------------------------------------------------------------------------------------|-----------------------------------------------------------------------------------------------------------------------------------------------------------------------------------------------------------------------------------------------------------------------------------------------------------------------------------------------------------------------------------------------------------------------------------------------------------------------------------------------------------------------------------------------------------------------------------------------------------------------------------------------------------------------------------------------------------------------------------------------------------------------------------------------------------------------------------------------------------------------------------------------------------------------------------------------------------------------------------------------------------------------------------------------------------------------------------------------------------------------------------------------------------------------------------------------------------------------------------------------------------------------------------------------------------------|
|                                                                                                                                                                                                                                                                                                                                                                                                                                                                                                             | <p>Hence, when a species has more than 10 sequences in a gene family, we remove all sequences in this gene family of this species" (page 13, line 272-277).</p> <p>6. Page 13: "Out of 69 samples in total, 65 samples (that is 94.2% of total) were defined to have a relatively higher gene coverage degree. "<br/> - Please be more specific. What if any threshold was used?<br/> R: This sentence has been changed as "Out of the 69 samples in total, the gene coverage of 65 samples (94.2%) exceeded 82%, with at least 251 complete genes identified" (page 14, line 299-300).</p> <p>7. Page 14: "Statistically consistency was estimated from unrooted gene trees under the multi-species coalescent model."<br/> - This sentence has no meaning whatsoever. Authors don't seem to know what "statistical consistency" is and they should avoid making any claim about it. Remove or rephrase, please.<br/> R: This sentence has been removed in the revised manuscript.</p> <p>Reviewer #3: The authors satisfactory addressed all points raised in the previous round of review. The inclusion of a coalescent-based method to estimate the phylogeny is a very welcome addition and the differences in the obtained phylogenies are succinctly presented.<br/> R: Thank you for the comments.</p> |
| <b>Additional Information:</b>                                                                                                                                                                                                                                                                                                                                                                                                                                                                              |                                                                                                                                                                                                                                                                                                                                                                                                                                                                                                                                                                                                                                                                                                                                                                                                                                                                                                                                                                                                                                                                                                                                                                                                                                                                                                                 |
| <b>Question</b>                                                                                                                                                                                                                                                                                                                                                                                                                                                                                             | <b>Response</b>                                                                                                                                                                                                                                                                                                                                                                                                                                                                                                                                                                                                                                                                                                                                                                                                                                                                                                                                                                                                                                                                                                                                                                                                                                                                                                 |
| Are you submitting this manuscript to a special series or article collection?                                                                                                                                                                                                                                                                                                                                                                                                                               | No                                                                                                                                                                                                                                                                                                                                                                                                                                                                                                                                                                                                                                                                                                                                                                                                                                                                                                                                                                                                                                                                                                                                                                                                                                                                                                              |
| <b>Experimental design and statistics</b>                                                                                                                                                                                                                                                                                                                                                                                                                                                                   | Yes                                                                                                                                                                                                                                                                                                                                                                                                                                                                                                                                                                                                                                                                                                                                                                                                                                                                                                                                                                                                                                                                                                                                                                                                                                                                                                             |
| <p>Full details of the experimental design and statistical methods used should be given in the Methods section, as detailed in our <a href="#">Minimum Standards Reporting Checklist</a>. Information essential to interpreting the data presented should be made available in the figure legends.</p> <p>Have you included all the information requested in your manuscript?</p>                                                                                                                           |                                                                                                                                                                                                                                                                                                                                                                                                                                                                                                                                                                                                                                                                                                                                                                                                                                                                                                                                                                                                                                                                                                                                                                                                                                                                                                                 |
| <b>Resources</b>                                                                                                                                                                                                                                                                                                                                                                                                                                                                                            | Yes                                                                                                                                                                                                                                                                                                                                                                                                                                                                                                                                                                                                                                                                                                                                                                                                                                                                                                                                                                                                                                                                                                                                                                                                                                                                                                             |
| <p>A description of all resources used, including antibodies, cell lines, animals and software tools, with enough information to allow them to be uniquely identified, should be included in the Methods section. Authors are strongly encouraged to cite <a href="#">Research Resource Identifiers</a> (RRIDs) for antibodies, model organisms and tools, where possible.</p> <p>Have you included the information requested as detailed in our <a href="#">Minimum Standards Reporting Checklist</a>?</p> |                                                                                                                                                                                                                                                                                                                                                                                                                                                                                                                                                                                                                                                                                                                                                                                                                                                                                                                                                                                                                                                                                                                                                                                                                                                                                                                 |

|                                                                                                                                                                                                                                                                                                                                                                                                                                                                                                                                                         |            |
|---------------------------------------------------------------------------------------------------------------------------------------------------------------------------------------------------------------------------------------------------------------------------------------------------------------------------------------------------------------------------------------------------------------------------------------------------------------------------------------------------------------------------------------------------------|------------|
|                                                                                                                                                                                                                                                                                                                                                                                                                                                                                                                                                         |            |
| <p><b>Availability of data and materials</b></p> <p>All datasets and code on which the conclusions of the paper rely must be either included in your submission or deposited in <a href="#">publicly available repositories</a> (where available and ethically appropriate), referencing such data using a unique identifier in the references and in the “Availability of Data and Materials” section of your manuscript.</p> <p>Have you have met the above requirement as detailed in our <a href="#">Minimum Standards Reporting Checklist</a>?</p> | <p>Yes</p> |



# Large scale phylogenomic analysis resolves a backbone phylogeny in ferns

Hui Shen<sup>1,2#</sup>, Dongmei Jin<sup>1,2#</sup>, Jiang-Ping Shu<sup>1,2</sup>, Xi-Le Zhou<sup>1,2</sup>, Ming Lei<sup>3</sup>, Ran Wei<sup>4</sup>,  
Hui Shang<sup>1,2</sup>, Hong-Jin Wei<sup>1,2</sup>, Rui Zhang<sup>1,2</sup>, Li Liu<sup>1,2</sup>, Yu-Feng Gu<sup>1,2</sup>, Xian-Chun  
Zhang<sup>3</sup>, Yue-Hong Yan<sup>1,2\*</sup>

# Equal contributors

\*Corresponding author: [yhyan@sibs.ac.cn](mailto:yhyan@sibs.ac.cn)

<sup>1</sup>Shanghai Chenshan Plant Science Research Center, Chinese Academy of Sciences,  
Shanghai 201602, China; <sup>2</sup>Shanghai Key Laboratory of Plant Functional Genomics and  
Resources, Shanghai Chenshan Botanical Garden, Shanghai 201602, China; <sup>3</sup>Majorbio  
Bioinformatics Research Institute, Shanghai 201320, China. <sup>4</sup>State Key Laboratory of  
Systematic and Evolutionary Botany, Institute of Botany, Chinese Academy of Sciences,  
Beijing 100093, China.

## Abstract

**Background:** Ferns, originated about 360 million years ago, are the sister group of  
seed plants. Despite the remarkable progress in our understanding of fern phylogeny,  
with conflicting molecular evidences and different morphological interpretations,  
relationships among major fern lineages remain controversial.

**Results:** With the aim to obtain a robust fern phylogeny, we carried a large scale  
phylogenomic analysis using high-quality transcriptome sequencing data which  
covered 69 fern species from 38 families and 11 orders. Both coalescent-based and



1 22 concatenation-based methods were applied to both nucleotides and amino acids  
2  
3 23 sequences in species tree estimation. Among the mainly consistent and strongly  
4  
5  
6 24 supported topologies, topologies yielded from applying coalescent-based method and  
7  
8  
9 25 concatenation-based method, respectively, to nucleotides sequence are congruent  
10  
11  
12 26 except one position.

13  
14 27 **Conclusions:** Our result confirmed that Equisetales is sister to the rest of ferns, and  
15  
16  
17 28 Dennstaedtiaceae is sister to eupolypods. Moreover, our result strongly supported  
18  
19  
20 29 some relationships different from the current view of fern phylogeny, including that  
21  
22  
23 30 Marattiaceae may be sister to the monophyletic clade of Psilotaceae and  
24  
25  
26 31 Ophioglossaceae; Gleicheniaceae and Hymenophyllaceae form a monophyletic clade  
27  
28  
29 32 which is sister to Dipteridaceae; and that Aspleniaceae is sister to the rest groups in  
30  
31  
32 33 eupolypods II. These results were interpreted with morphological traits, especially  
33  
34  
35 34 sporangia characters, and a new evolutionary route of sporangial annulus in ferns was  
36  
37  
38 35 suggested. This backbone phylogeny in ferns sets a foundation for further studies in  
39  
40  
41 36 biology and evolution in ferns, and therefore in plants.

42 37 **Key Words:** phylogenomic, monilophytes, evolution, sporangium, transcriptome  
43  
44

## 45 38 **Background**

46  
47  
48 39 Phylogeny, which reflects natural history, is fundamental to understanding evolution  
49  
50  
51 40 and biodiversity. Ferns (monilophytes), originated about 360 million years (MY) ago,  
52  
53  
54 41 are the sister group of seed plants [1, 2]. With estimated 10,578 extant living species  
55  
56  
57 42 globally [3], they are the second most diverse group in vascular plants. Phylogenetic  
58  
59  
60 43 studies for ferns, especially based on molecular evidences, have been widely carried

1 44 in recent decades. These studies have revolutionized our understanding of the  
2  
3 45 evolution in ferns, among which the milestones being setting ferns as the sister group  
4  
5  
6 46 of seed plants [1, 2], placing Psilotaceae and Equisetaceae within ferns [2, 4, 5], and  
7  
8  
9 47 revealing a major polypods radiation following the rise of angiosperms [6, 7].  
10  
11  
12 48 Resolution at shallow phylogenetic depth among families or genera have also been  
13  
14 49 improved remarkably [8-14].  
15  
16  
17

18 50 However, previous researches on fern phylogeny have mostly relied on plastid  
19  
20  
21 51 genes [10, 12, 13], some combined with a few nuclear genes [4, 5, 14] or  
22  
23  
24 52 morphological traits [5, 11]. Due to incomplete lineage sorting (ILS), genes from  
25  
26  
27 53 different resources often show conflicting evolutionary patterns, especially when  
28  
29  
30 54 based on a limited number of samples, some deep relationships in fern phylogeny  
31  
32 55 remain controversial (Figure 1). In the latest PPG I system [3], which has derived from  
33  
34  
35 56 many recent phylogenetic studies, some important nodes remain uncertain, such as (i)  
36  
37  
38 57 what are the relationships among Marattiales, Ophiglossales and Psilotales? (ii) are  
39  
40  
41 58 Hymenophyllales and Gleicheniales sister groups? and (iii) what are the relationships  
42  
43 59 among families in eupolypods II?  
44  
45

46 60 Transcriptome sequencing (RNA-Seq) represents massive transcript information  
47  
48  
49 61 from the genome. Phylogenetic reconstructions based on RNA-Seq are more efficient  
50  
51  
52 62 and cost-effective than traditional PCR-based or EST-based methods when lacking  
53  
54  
55 63 whole-genome data [15]. Successful cases in recent years include mollusks [16],  
56  
57  
58 64 insects [17], the grape family [18], angiosperms [19], and land plants including six  
59  
60  
61

1 65 ferns [20]. Here, with the aim to reconstruct the framework of fern phylogeny, we  
2  
3 66 sampled abundant fern species representing all important lineages and applied latest  
4  
5  
6 67 phylogenomic analyses based on RNA-Seq.  
7  
8  
9

10 68 To reconstruct a robust and well-resolved phylogeny in ferns, applying multiple  
11  
12 69 methods of phylogenomic analysis is extremely important. Since concatenation-based  
13  
14  
15 70 estimations of species tree usually have good accuracy under low level of ILS, while  
16  
17  
18 71 coalescent-based methods are developed to overcome the effect of ILS, but are  
19  
20  
21 72 sensitive to gene tree estimation error [21], so both concatenation-based and  
22  
23  
24 73 coalescent-based estimations are applied. Nucleotide sequence, with higher variability  
25  
26  
27 74 than amino acid sequence, usually brings more useful information in phylogeny  
28  
29  
30 75 reconstruction, especially for closely related taxa. However, the compositional bias in  
31  
32  
33 76 nucleotide sequence, especially in the third codon position, may lead to a deviation  
34  
35  
36 77 from the true phylogeny. Here, both nucleotide and amino-acid sequences are used in  
37  
38  
39 78 phylogeny reconstruction.  
40

41 79 In the aspect of morphology, fern sporangium is an organ for enclosing and  
42  
43  
44 80 dispersing spores, most of which functions like a unique catapult with annulus [22].  
45  
46  
47 81 During the last centuries, Bower's hypothesis on the evolution of sporangia with a  
48  
49  
50 82 focus on annulus [23] had been one of the most important cornerstones to fern  
51  
52  
53 83 phylogeny based on morphology [24, 25]. However, this hypothesis has been  
54  
55  
56 84 challenged by somewhat conflicting frameworks of fern phylogeny [4, 10, 12, 14, 26].  
57  
58  
59 85 A robust framework in fern phylogeny which reflects the evolutionary history will  
60  
61  
62  
63  
64  
65

1 86 improve our understanding for the evolution of fern sporangia as well as other  
2  
3 87 characters.  
4  
5  
6

## 7 88 **Data description**

### 9 89 **Taxa sampling and RNA-Seq**

10 89 We chose 69 fern species from 38 families according to PPG I system (totally 48 fern  
11  
12 90 families), covering all the 11 orders (Equisetales, Psilotales, Ophioglossales,  
13  
14 91 Marattiales, Osmundales, Hymenophyllales, Gleicheniales, Schizaeales, Salviniiales,  
15  
16 92 Cyatheaales, and Polypodiales). Information about the location and time for sampling is  
17  
18 93 given in Table S1. All the sampled species were collected under the permissions of the  
19  
20 94 natural reserves and Shanghai Chenshan Botanical Garden in China.  
21  
22  
23  
24  
25  
26  
27  
28  
29

30 96 Sporophyll or/and trophophyll were collected and frozen in liquid nitrogen  
31  
32 97 immediately, and preserved in Ultra-low temperature refrigerator at -80°C before RNA  
33  
34 98 extraction. Total RNA was extracted using TRIzol (Life Technologies Corp.) according  
35  
36 99 to the manufacturer's protocols. The RNA concentration was determined using a  
37  
38 100 NanoDrop spectrophotometer, and RNA quality was assessed with an Agilent  
39  
40 101 Bioanalyzer. Paired-end reads were generated by Majorbio Company (Shanghai,  
41  
42 102 China) using the HiSeq 2500 system. Raw reads were deposited in NCBI [27].  
43  
44  
45  
46

### 47 103 **Transcriptomes assembly and orthology assignment**

48 104 Transcriptomes data were generated from 69 fern species (Table 1). After filtering,  
49  
50 105 about 2,726.9 million pair-end DNA sequence reads (about 313 Gbp) were retained.  
51  
52 106 We assembled these reads *de novo* and obtained a total of 5,449,842 contigs [28].  
53  
54  
55  
56

57 107 In order to obtain a reliable phylogenetic relationship, we selected four species as  
58  
59 108 the outgroup, representing the main lineages of land plants: *Amborella trichopoda*  
60  
61

109 (representing angiosperms), *Picea abies* (representing gymnosperms), *Selaginella*  
110 *moellendorffii* (representing lycophytes), *Physcomitrella patens* (representing  
111 bryophytes). The translated ORF (protein) sequences of these four species were  
112 downloaded from Phytozone [29] and used in the following analysis.

113 To ensure the consistency of phylogenomic analysis, we used a phylogenetic-  
114 based ortholog selection method, and obtained two subsets of “one to one”  
115 orthologous genes that differed in gene number and species occupancy rate, named  
116 “Matrix 1” and “Matrix 2” [30]. Matrix 1 consists of 2391 genes that are present in at  
117 least 52 taxa (that is 75% of the 69 taxa in total), resulted in 2,024,565 nucleotide and  
118 674,855 amino acid positions, the gene and character occupancy were 88% and 85%  
119 respectively. Matrix 2 consists of 1334 genes that are present in at least 62 taxa (that  
120 is 90% of the 69 taxa in total), resulted in 1,171,332 nucleotide and 390,444 amino  
121 acid positions, the gene and character occupancy reached 94% and 90% in each. For  
122 each orthologues gene set, coalescent-based and concatenation-based methods  
123 were applied separately to both nucleotides and amino acids sequences. A working  
124 flow diagram showing the major processes in this study is given in Figure 2.

## 125 Results

### 126 Species tree estimated in 69 ferns

127 For each combination of reconstruction methods (coalescent-based or concatenation-  
128 based) and sequence types (nucleotides or amino acids), Matrix 1 and Matrix 2 [31,  
129 32] always yielded the same topology. In general, the four topologies (Figure 3, Figure  
130 S1, S2, S3) from a combination of methods and sequence types are consistent except  
131 six positions (Table 2). Among the topologies, the one estimated by applying

1 132 coalescent-based method to nucleotide sequence (Figure 3) and the one applying

2  
3 133 concatenation-based method (Figure S2) are most congruent.

## 4 5 6 7 134 **Reconstruction of the evolutionary history of sporangial annulus**

8  
9  
10 135 Our reconstruction of the evolution of sporangial annulus (Figure 4) showed that ex-

11  
12 136 annulus sporangia are inferred to be the ancestral state (proportional likelihood [PL]: 1),

13  
14  
15 137 and the rest of annulus states are likely derived from ex-annulus sporangia. Vertical

16  
17  
18 138 annulus is suggested as synapomorphy for all polypod ferns (PL > 0.99). Both oblique

19  
20  
21 139 annulus and rudimentary annulus have experienced parallel evolution.

## 22 23 24 25 140 **Discussion**

### 26 27 141 **Comparison of topologies estimated by various methods**

28  
29 142 By comparing topologies estimated by coalescent-based and concatenation-based

30  
31 143 method using both nucleotide and amino-acid sequences (Table 2), we find that the

32  
33  
34 144 topologies yielded from coalescent-based and concatenation-based methods using

35  
36 145 nucleotide sequence are mostly consistent, except the position of *Angiopteris*

37  
38 146 *fokiensis*. Topologies yielded from coalescent-based method using nucleotide

39  
40  
41 147 sequence and amino-acid sequence showed three positions of inconsistency, all of

42  
43 148 which belong to eupolypods. Since eupolypods have experienced rapid evolutionary

44  
45 149 radiation in Cenozoic (Figure 3), and nucleotide sequences usually provide more

46  
47 150 information to reconstruct relationships at shallow phylogenetic scale, we consider the

48  
49 151 topology yielded from nucleotide sequence maybe more reliable. However, the

50  
51 152 inconsistent positions among topologies often show relatively lower supporting values,

52  
53 153 and are often controversial nodes from past studies based on different genes, we

54  
55 154 suggest such inconsistency might be caused partially by LIS and reticulate evolution.

### 56 57 58 59 155 **Relationships of eusporangiate ferns**

1 156 Which clade is sister to the remaining taxa in ferns is a long-debated question (Figure  
2  
3  
4 157 1). Our results strongly supported that Equisetales (horsetails) are the sister group to  
5  
6 158 all other monilophytes. This topology confirmed the results reported by Rai & Graham  
7  
8  
9 159 [12], and Kuo *et al.* [33] based on plastid genes, and has been accepted by the PPG I  
10  
11 160 [3] in 2016. Distinct from most fern phylogeny based on molecular evidences (Figure  
12  
13  
14 161 1), our results based on coalescent method revealed that Psilotales (whisk ferns),  
15  
16  
17 162 Ophioglossales (moonworts), and Marattiales (king ferns) form a monophyletic clade  
18  
19  
20 163 as ((Psilotales, Ophioglossales), Marattiales), which is sister to Leptosporangiate  
21  
22 164 ferns. The monophyletic origin of Psilotales, Ophioglossales, and Marattiales, which  
23  
24  
25 165 belong to eusporangiate ferns, is supported by the structure of sporangia. Being  
26  
27  
28 166 different from the Leptosporangiate type, sporangia of eusporangiate ferns have no  
29  
30  
31 167 sporangiophore, they are thick in wall and large in volume, produce a large amounts  
32  
33  
34 168 of spores, and have no sporangial annulus or only a few thickened cells. The  
35  
36  
37 169 incongruence between the results based on coalescent and concatenation methods  
38  
39  
40 170 may be caused by strong ILS effect, which is a main pitfall when using concatenation  
41  
42 171 method [21].  
43  
44

#### 45 172 **Relationship of early leptosporangiates**

46  
47  
48 173 Within early leptosporangiates, our results revealed a new monophyletic clade that  
49  
50  
51 174 Gleicheniaceae (forking ferns) is sister to Hymenophyllaceae (filmy ferns), which is  
52  
53  
54 175 different from the mainstream [3, 10, 12-14, 34]. Similar but still different from the  
55  
56  
57 176 topology (((Dipteridaceae, Matoniaceae), Gleicheniaceae), Hymenophyllaceae)  
58  
59  
60 177 reported by Pryer *et al.* in 2004 [5], in our results, *Cheiropleuria*, which belongs to  
61  
62  
63  
64  
65



1 178 Dipteridaceae and formerly placed in Gleicheniales [2, 5, 12, 26, 35, 36], is sister to  
2  
3 179 the monophyletic clade of (Gleicheniaceae, Hymenophyllaceae).  
4  
5  
6

7 180 This new relationship is supported by sporangia character. Early  
8  
9 181 leptosporangiates [36] are characterized with diverse sporangia and annulus.  
10  
11 182 However, both Gleicheniaceae and Hymenophyllaceae have spherical sporangia with  
12  
13 183 transverse-oblique annulus, as well as short sporangial stalk connecting to prominent  
14  
15 184 receptacle [37]. On the other hand, flattened sporangia with slightly oblique annulus  
16  
17 185 are found in *Cheiropleuria*. Moreover, long sporangial stalk and inapparent receptacle  
18  
19 186 are common in *Cheiropleuria*, *Dipteris* and *Matonia*. We suggest Dipteridaceae,  
20  
21 187 probably together with its sister lineage Matoniaceae [5, 12], may be sister to the  
22  
23 188 clade of (Gleicheniaceae, Hymenophyllaceae). According to our results,  
24  
25 189 Gleicheniales, which is comprised of Dipteridaceae, Matoniaceae, and  
26  
27 190 Gleicheniaceae [26], is no longer a monophyletic lineage, but a paraphyletic one.  
28  
29  
30  
31  
32  
33  
34  
35  
36  
37

### 38 191 **Relationships within polypod ferns**

39  
40  
41 192 Polypods include more than 80% of living ferns, and their phylogeny remains  
42  
43 193 somewhat controversial and elusive [26, 35, 36]. Our results strongly supported that  
44  
45 194 Dennstaedtiaceae instead of Pteridaceae, is sister to eupolypods. This pattern  
46  
47 195 confirmed the topology suggested recently by Rothfels *et. al* basing on 25 low-copy  
48  
49 196 nuclear genes [14] and Lu *et. al* basing on plastid genes [13], as well as PPG I system  
50  
51 197 [3]. In our result, relationships of Pteridaceae [34, 36, 38] and Dennstaedtiaceae [36]  
52  
53 198 are also well resolved. Notably, *Monachosorum* is sister to the rest members in  
54  
55  
56  
57  
58  
59  
60  
61  
62  
63  
64  
65

1 199 Dennstaedtiaceae, rather than being sister to the lineage of Peridium, Hypolepis and  
2  
3 200 Histiopteris [36].  
4  
5  
6

7 201 Our results showed that eupolypods are divided into two major lineages,  
8  
9 202 eupolypods I and eupolypods II in agreement with the consensus opinion [3]. Within  
10  
11 203 eupolypods II, our results supported that Aspleniaceae is the sister group to the rest  
12  
13 204 members, which is different from the current viewpoints [26, 36, 39]. Within  
14  
15 205 eupolypods I, our result strongly supported that Lomariopsidaceae and  
16  
17 206 Nephrolepidaceae form a paraphyletic group, rather than a monophyletic clade based  
18  
19 207 on plastid genes [10, 26, 36].  
20  
21  
22  
23  
24  
25  
26

27 208 Our new topology confirmed the morphology-based hypothesis that  
28  
29 209 Dennstaedtiaceae with two indusial, rather than Pteridaceae with one false indusium,  
30  
31 210 is more closely related to eupolypod ferns [40]. In Pteridaceae, the unstable structure  
32  
33 211 of spherical sporangia, including variable annulus and short sporangial stalk, indicates  
34  
35 212 these characters of sporangia are relatively original and are close to those with  
36  
37 213 oblique annulus in early leptosporangiate [23]. We also noticed that the characters of  
38  
39 214 spherical sporangia with slightly oblique annulus in *Monachosorum* should be more  
40  
41 215 primitive than the flattened sporangia with typical vertical annulus in other genera of  
42  
43 216 Dennstaedtaceae. For distinguishing eupolypods I and eupolypods II, the number and  
44  
45 217 shape of the vascular bundles at the base of petiole have been demonstrated to be a  
46  
47 218 powerful diagnostic character [36, 39].  
48  
49  
50  
51  
52  
53  
54  
55  
56  
57  
58

59 219 **The evolution of sporangial annulus in ferns**  
60  
61  
62  
63  
64  
65

1 220 By observing the character of sporangial annulus of abundant samples in each fern  
2  
3 221 group, and combining these characters with our well-resolved backbone phylogeny  
4  
5  
6 222 (Figure 3), we reconstructed the evolutionary history of sporangial annulus in ferns  
7  
8  
9 223 (Figure 4). According to the results, we infer that ex-annulus sporangia, as in  
10  
11 224 Equisetaceae, Psilotaceae, and Ophioglossaceae, is the ancient state in ferns;  
12  
13  
14 225 rudimentary multiseriate annulus, which is inverse U-shaped in Marattiaceae, and U-  
15  
16  
17 226 shaped in Osmundaceae; equatorial transverse-oblique uniseriate annulus, as in  
18  
19  
20 227 Gleicheniaceae and Hymenophyllaceae; oblique annulus as in Cyatheales (tree  
21  
22  
23 228 ferns), and vertical annulus as synapomorphy in polypods, have been derived from  
24  
25  
26 229 the ex-annulus state. Both Apical annulus as in Lygodium and Schizaea, and vestige  
27  
28  
29 230 or disappeared annulus as in Salviniaceae (aquatic ferns) are likely to be specialized in  
30  
31  
32 231 parallel from oblique annulus. Inconsistent with Bower's hypothesis [23], our results  
33  
34  
35 232 showed that sporangia with apical annulus as in Schizaeales are no longer the  
36  
37  
38 233 primitive type in ferns but a specialized one. Correspondingly, the oldest fossils of  
39  
40  
41 234 Schizaeaceae is now believed to appear in Jurassic (201-145 Ma BP) rather than  
42  
43  
44 235 formerly thought Carboniferous (359-252 Ma BP) [41].

## 236 **Conclusion**

237 Our results confirmed that Equisetales is sister to all the other monilophytes, and  
238 Dennstaedtiaceae is sister to eupolypods which have been reported previously.  
239 Moreover, our results revealed some new relationships, such as eusporangiate ferns  
240 except Equisetales may form a monophyletic clade as ((Psilotaceae,  
241 Ophioglossaceae), Marattiaceae); while Gleicheniaceae and Hymenophyllaceae form

1 242 a monophyletic clade which is sister to Dipteridaceae; and Aspleniaceae is sister to  
2  
3 243 the rest groups in eupolypods II. Most of these results are supported by sporangia  
4  
5  
6 244 characters, and a new evolutionary route of sporangial annulus in ferns is suggested.  
7  
8  
9

## 10 245 **Potential implications**

11  
12 246 Here, we present a robust fern phylogeny yielded from a largescale phylogenomic  
13  
14  
15 247 analysis based on a high-quality RNA-seq dataset set covering 69 fern specie. This  
16  
17  
18 248 backbone phylogeny in ferns sets a foundation for further studies in biology and  
19  
20  
21 249 evolution in ferns and therefore in plants, especially when fern genomes are not  
22  
23  
24 250 available.  
25  
26

## 27 251 **Methods**

### 28 252 ***De novo* transcriptome assembly**

29  
30  
31 253 For each paired-end library, we first removed the Illumina adapter of raw reads using  
32  
33  
34 254 Scythe [42] and trimmed the poor quality bases using DynamicTrim Perl script of the  
35  
36 255 SolexQA package with default parameters [43]. Next, *de novo* transcriptome assembly  
37  
38 256 of each species was conducted using the Trinity package (version:  
39  
40 257 trinityrnaseq\_r20140413) with default parameters [44]. To discard the duplicated  
41  
42 258 sequences, the obtained contigs were clustered using CD-HIT-EST (v4.6.1) to  
43  
44 259 generated a non-redundant contigs. All contigs with lengths greater than 200 bp were  
45  
46 260 used for downstream analysis. We used the transDecoder, a program in the Trinity  
47  
48 261 package, to identify the candidate coding sequences (CDSs) from the contigs with  
49  
50 262 default criteria. Finally, the translated protein sequences of CDSs were searched by  
51  
52 263 BLASTP against the NCBI nr protein database with an e-value threshold of 1E-5.  
53  
54 264 These BLASTP hit sequences were used for further analysis.  
55  
56  
57  
58

### 59 265 **Orthology assignment, alignment, and alignment masking**

1  
2  
3  
4  
5  
6  
7  
8  
9  
10  
11  
12  
13  
14  
15  
16  
17  
18  
19  
20  
21  
22  
23  
24  
25  
26  
27  
28  
29  
30  
31  
32  
33  
34  
35  
36  
37  
38  
39  
40  
41  
42  
43  
44  
45  
46  
47  
48  
49  
50  
51  
52  
53  
54  
55  
56  
57  
58  
59  
60  
61  
62  
63  
64  
65

266 The orthology assignment for the 69 sample assemblies together with the four  
267 outgroup species employed a phylogenetic based clustering method described  
268 previously [16]. In short, all-vs-all BLAST search of amino acid sequence was  
269 performed among every species, the BLAST results were clustered using MCL [45]  
270 software with the parameters '-l 2-tf 'gq(20)". Optimization of the inflation parameter  
271 (l) was conducted as described previously [46], the default value 2.0 was selected  
272 ultimately. As the de novo assembly by Trinity produces many sequences with high  
273 similarity, which contain both paralogs and isoforms [47], when a clustered gene  
274 family contains too many sequences (eg. more than 10), the risk of contamination of  
275 isoforms rises, along with the computational infeasibility. Hence, when a species has  
276 more than 10 sequences in a gene family, we remove all sequences in this gene  
277 family of this species. Then, groups with at least 35 (50%) ferns species were aligned  
278 using eini command, implemented in MAFFT [48], and trimmed by Gblocks with  
279 default parameters [49]. Next, for each group, homologous gene tree was built with  
280 RAxML software (version: 8.0.20) by implementing the maximum likelihood method  
281 (ML) [50]. To infer orthologous genes, we used treeprune.pyscript in the agalma [51]  
282 package to mask the monophyletic sequences. We pruned the paralogous subtrees  
283 from the homologous gene trees until only one monophyletic subtree retained. Next,  
284 the resulted orthologous gene trees were further filtered by the criteria that each  
285 species should be represented by only one sequence, this resulted subset genes  
286 were referred to "one to one orthologs", which were largely free of gene duplication.  
287 Then, we extracted both the CDSs (nucleotide sequence) and translated amino acid  
288 sequence from the each orthologous gene group, followed by aligning with MAFFT  
289 and trimming with Gblocks. The alignment which with coding and corresponding  
290 translated sequences lengths greater than 150 bp (or 50 amino acids) were kept for  
291 the further analysis.

## 292 **BUSCO analysis**

1  
2  
3  
4  
5  
6  
7  
8  
9  
10  
11  
12  
13  
14  
15  
16  
17  
18  
19  
20  
21  
22  
23  
24  
25  
26  
27  
28  
29  
30  
31  
32  
33  
34  
35  
36  
37  
38  
39  
40  
41  
42  
43  
44  
45  
46  
47  
48  
49  
50  
51  
52  
53  
54  
55  
56  
57  
58  
59  
60  
61  
62  
63  
64  
65

293 The Basic Universal Single Copy Orthologs (BUSCOs), which employ a core set of  
294 orthologs conserved in all eukaryotic species to determine the gene coverage of each  
295 assembly [52], was employed to assess the completeness of the transcriptome  
296 assembly we obtained (Table S2) [53]. A total of 303 BUSCOs were employed to blast  
297 against by translated amino acid of the assemblies using BLASTP. Then the number  
298 of complete and partially matched gene from each assembly was counted  
299 respectively. Out of the 69 samples in total, the gene coverage of 65 samples (94.2%)  
300 exceeded 82%, with at least 251 complete genes identified. Unexpectedly, among our  
301 total assemblies, 1 sample (*Aleuritopteris chrysophylla*, named RS\_72) presented  
302 extremely low gene coverage degree, in which only 72 (23.8%) complete  
303 housekeeping genes were found (Supplementary Table 2). However, when the sample  
304 is deleted from the matrix used to construct the backbone of the phylogenetic tree, the  
305 topology remains unchanged, indicating that the lower completeness in this sample  
306 doesn't affect our results (data not shown).

### 307 **Phylogenetic analysis**

308 The coalescent-based species tree was reconstructed by ASTRAL v4.10.4 [54],  
309 carried out 100 replicates of multi-locus bootstrapping [55]. Each gene tree was  
310 constructed with the PROJTT model by RAxML v8.2.4 [50], performed 100 random  
311 replicates to calculate bootstrap value. For the concatenation analysis, we performed  
312 the maximum likelihood analyses (ML) for each matrix using RAxML software (version:  
313 8.0.20). The branch support was evaluated using 100 bootstrap replicates. We used  
314 the "GTR +  $\Gamma$ 4 + I" model for DNA matrices, and the JTT model for the corresponding  
315 protein matrices, selected by "ProtienModelselection.pl" [56]. To estimate the  
316 divergence times, we used the concatenated alignment of orthologs, calibrated with  
317 ages of two fossils (*Archaeocalamites Senftenbergia*: 354 MY, *Grammatopteris*: 280  
318 MY [6, 57]) as the minimum ages of monilophytes and leptosporangiate ferns,  
319 respectively, and a maximum-age constraint of 500 MY for land plants, in a Bayesian

1  
2  
3  
4  
5  
6  
7  
8  
9  
10  
11  
12  
13  
14  
15  
16  
17  
18  
19  
20  
21  
22  
23  
24  
25  
26  
27  
28  
29  
30  
31  
32  
33  
34  
35  
36  
37  
38  
39  
40  
41  
42  
43  
44  
45  
46  
47  
48  
49  
50  
51  
52  
53  
54  
55  
56  
57  
58  
59  
60  
61  
62  
63  
64  
65

320 relaxed clock method using MCMCTREE [58] on the coalescent species tree.

## 321 **Reconstruction of the evolution of sporangial annulus**

322 Characters of sporangial annulus of the sampled species were observed using a  
323 polarized light microscope (Axio Scope.A1, ZEISS) after the fresh and mature  
324 sporangia were treated with sodium hypochlorite (NaClO) solution. The evolution of  
325 sporangial annulus was reconstructed with likelihood method implemented in  
326 Mesquite v2.7.5 [59]. All character states (i.e., vertical annulus, oblique annulus,  
327 rudimentary annulus, ex-annulus, apical annulus, transverse annulus, and vestigial  
328 annulus) were treated as unordered and equally weighted. To reconstruct character  
329 evolution, a maximum likelihood approach using Markov k-state 1 parameter model  
330 [60] was applied. To account for phylogenetic uncertainty, the “Trace-characters-over-  
331 trees” command was used to calculate ancestral states at each node including  
332 probabilities in the context of likelihood reconstructions. To carry out these analyses,  
333 characters were plotted onto 100 trees that were sampled in the ML analyses of the  
334 combined dataset using RAxML v7. The results were finally summarized as  
335 percentage of changes of character states on a given branch among all 100 trees  
336 utilizing the option of “Average-frequencies-across-trees”.

## 337 **Declarations**

### 338 **List of abbreviations**

339 BUSCOs, the basic universal single copy orthologs;  
340 ILS, incomplete lineage sorting;  
341 MY, million years;



1 342 PPG, the pteridophyte phylogeny group;

2  
3 343 RNA-Seq, transcriptome sequencing.

4  
5  
6 344 **Additional files**

7  
8 345 Additional file1: Tables S1 to S2 and Figures S1 to S3.

9  
10  
11 346 **Availability of data and materials**

12  
13 347 Raw reads of RNA-Seq for 69 fern species were deposited in GenBank under

14  
15 348 Bioproject accession number PRJNA281136.

16  
17 349 Transcriptome datasets for 69 fern species:

18  
19 350 <https://figshare.com/s/0f773861b6813f97ff63>;

20  
21 351 datasets of coalescent-based species tree:

22  
23 352 <https://figshare.com/s/e5e70c2fd3990e5176d8>;

24  
25 353 Datasets of concatenation based phylogenetic tree:

26  
27 354 <https://figshare.com/s/8af236b660f61078e40b>;

28  
29 355 Alignments: <https://figshare.com/s/f835735cb66911ff1ffd>;

30  
31 356 BUSCO results: <https://figshare.com/s/bf999173d04b4c311d46>;

32  
33 357 Scripts: <https://figshare.com/s/b28085ee6a7b69f758e9>.

34  
35  
36 358 **Consent for publication**

37  
38 359 Not applicable

39  
40  
41 360 **Competing interests**

42  
43 361 The authors declare that they have no competing interests

44  
45  
46 362 **Funding**

47  
48 363 This work was funded by Shanghai Landscaping & City Appearance Administrative

49  
50 364 Bureau of China, Scientific Research Grants (F132421 and F112422) and the National

51  
52 365 Natural Science Foundation of China (31370234).

53  
54  
55 366 **Authors' contributions**

1  
2  
3  
4  
5  
6  
7  
8  
9  
10  
11  
12  
13  
14  
15  
16  
17  
18  
19  
20  
21  
22  
23  
24  
25  
26  
27  
28  
29  
30  
31  
32  
33  
34  
35  
36  
37  
38  
39  
40  
41  
42  
43  
44  
45  
46  
47  
48  
49  
50  
51  
52  
53  
54  
55  
56  
57  
58  
59  
60  
61  
62  
63  
64  
65

367 YHY and HShen conceived of and oversaw the study. YHY, HShen designed, ML,  
368 JPS, RW, DMJ and LL implemented the data analyses. YHY, HShen, HJW, XLZ,  
369 HShang and YFG collected the specimens. HShen, RZ and YFG prepared the  
370 specimens for sequencing. XLZ provides the anatomical data. DMJ, HShen, YHY,  
371 JPS, ML, RW, HShang, XLZ and XCZ wrote the manuscript.

## 372 **Acknowledgements**

373 We thank Dr. Lin-Bin Zhang, Prof. Yin-long Qiu and Paul G. Wolf from the USA and Dr.  
374 Jun Yang from Shanghai Chenshan Botanical Garden of China for providing important  
375 suggestions regarding the research methods. We appreciate Prof. Xiao-Ya Chen,  
376 Yong-Hong Hu, Jin-shuang Ma, and Zhao-qin Chu from Shanghai Chenshan  
377 Botanical Garden of China, as well as Prof. Fu-Wu Xing from South China Botanical  
378 Garden of CAS for helpful comments and suggestions. We also thank reviewers of the  
379 former manuscript Dr. Fay-Wei Li, Siavash Mirarab, and Naim Matasci for their helpful  
380 suggestions.

## 381 **Ethics approval and consent to participate**

382 Not applicable

## 383 **References**

- 384 1. Duff RJ, Nickrent DL. Phylogenetic relationships of land plants using mitochondrial small-  
385 subunit rDNA sequences. *Am J Bot*, 1999;86:372-86.
- 386 2. Pryer KM, Schneider H, Smith AR, Cranfill R, Wolf PG, Hunt JS, et al. Horsetails and  
387 ferns are a monophyletic group and the closest living relatives to seed plants. *Nature*.  
388 2001;409:618-22.
- 389 3. The Pteridophyte Phylogeny Group. A community-derived classification for extant  
390 lycophytes and ferns. *J Syst Evol*. 2016. doi:10.1111/jse.12229
- 391 4. Qiu Y-L, Li L, Wang B, Chen Z, Knoop V, Groth-Malonek M, et al. The deepest  
392 divergences in land plants inferred from phylogenomic evidence. *Proc Natl Acad Sci USA*.  
393 2006;103:15511-6.

- 1  
2  
3  
4  
5  
6  
7  
8  
9  
10  
11  
12  
13  
14  
15  
16  
17  
18  
19  
20  
21  
22  
23  
24  
25  
26  
27  
28  
29  
30  
31  
32  
33  
34  
35  
36  
37  
38  
39  
40  
41  
42  
43  
44  
45  
46  
47  
48  
49  
50  
51  
52  
53  
54  
55  
56  
57  
58  
59  
60  
61  
62  
63  
64  
65
- 394 5. Pryer KM, Schuettpelz E, Wolf PG, Schneider H, Smith AR, Cranfill R. Phylogeny and  
395 evolution of ferns (monilophytes) with a focus on the early leptosporangiate divergences.  
396 *Am J Bot.* 2004;91:1582-98.
  - 397 6. Schneider H, Schuettpelz E, Pryer KM, Cranfill R, Magallon S, Lupia R. Ferns diversified  
398 in the shadow of angiosperms. *Nature.* 2004;428:553-7.
  - 399 7. Schuettpelz E, Pryer KM. Evidence for a Cenozoic radiation of ferns in an angiosperm-  
400 dominated canopy. *Proc Natl Acad Sci USA.* 2009;106:11200-5.
  - 401 8. Zhang LB, Zhang L, Dong SY, Sessa EB, Gao XF, Ebihara A. Molecular circumscription  
402 and major evolutionary lineages of the fern genus *Dryopteris* (Dryopteridaceae). *BMC*  
403 *Evol Biol.* 2012. doi:10.1186/1471-2148-12-180.
  - 404 9. Liu H-M, Zhang X-C, Wang W, Qiu Y-L, Chen Z-D. Molecular phylogeny of the fern  
405 family dryopteridaceae inferred from chloroplast *rbcL* and *atpB* genes. *Int J Plant Sci.*  
406 2007;168:1311-23.
  - 407 10. Liu H-M. Embracing the pteridophyte classification of Ren-Chang Ching using a generic  
408 phylogeny of Chinese ferns and lycophytes. *J Syst Evol.* 2016;54:307-35.
  - 409 11. Schneider H, Smith AR, Pryer KM. Is morphology really at odds with molecules in  
410 estimating fern phylogeny? *Syst Bot.* 2009;34:455-75.
  - 411 12. Rai HS, Graham SW. Utility of a large, multigene plastid data set in inferring higher-order  
412 relationships in ferns and relatives (monilophytes). *Am J Bot.* 2010;97:1444-56.
  - 413 13. Lu J-M, Zhang N, Du X-Y, Wen J, Li D-Z. Chloroplast phylogenomics resolves key  
414 relationships in ferns. *J Syst Evol.* 2015;53:448-57.
  - 415 14. Rothfels CJ, Li F-W, Sigel EM, Huiet L, Larsson A, Burge DO, et al. The evolutionary  
416 history of ferns inferred from 25 low-copy nuclear genes. *Am J Bot.* 2015;102:1089-107.
  - 417 15. Hittinger CT, Johnston M, Tossberg JT, Rokas A. Leveraging skewed transcript abundance  
418 by RNA-Seq to increase the genomic depth of the tree of life. *Proc Natl Acad Sci USA.*  
419 2010;107:1476-81.
  - 420 16. Smith S, Wilson N, Goetz F, Feehery C, Andrade S, Rouse G, et al. Resolving the  
421 evolutionary relationships of molluscs with phylogenomic tools. *Nature.* 2011;480:364-7.
  - 422 17. Misof B, Liu S, Meusemann K, Peters RS, Donath A, Mayer C, et al. Phylogenomics  
423 resolves the timing and pattern of insect evolution. *Science.* 2014;346:763-7.
  - 424 18. Wen J, Xiong Z, Nie Z-L, Mao L, Zhu Y, Kan X-Z, et al. Transcriptome sequences resolve  
425 deep relationships of the grape family. *Plos One.* 2013;8:e74394.

- 1  
2  
3  
4  
5  
6  
7  
8  
9  
10  
11  
12  
13  
14  
15  
16  
17  
18  
19  
20  
21  
22  
23  
24  
25  
26  
27  
28  
29  
30  
31  
32  
33  
34  
35  
36  
37  
38  
39  
40  
41  
42  
43  
44  
45  
46  
47  
48  
49  
50  
51  
52  
53  
54  
55  
56  
57  
58  
59  
60  
61  
62  
63  
64  
65
- 426 19. Zeng L, Zhang Q, Sun R, Kong H, Zhang N, Ma H. Resolution of deep angiosperm  
427 phylogeny using conserved nuclear genes and estimates of early divergence times. *Nature*  
428 *Communications*. 2014. doi:10.1038/ncomms5956
- 429 20. Wickett NJ, Mirarab S, Nam N, Warnow T, Carpenter E, Matasci N, et al.  
430 Phylotranscriptomic analysis of the origin and early diversification of land plants. *Proc*  
431 *Natl Acad Sci USA*. 2014;111:E4859-68.
- 432 21. Mirarab S, Bayzid MS, Boussau B, Warnow T. Statistical binning enables an accurate  
433 coalescent-based estimation of the avian tree. *Science*, 2014.doi:10.1126/science.1250463
- 434 22. Noblin X, Rojas N, Westbrook J, Llorens C, Argentina M, Dumais J. The fern sporangium:  
435 a unique catapult. *Science*. 2012;335:1322.
- 436 23. Bower FO. *The Ferns (Filicales) treated comparatively with a view to their natural*  
437 *classification*. Vol 1-3. London: Cambridge University Press. 1923-1928.
- 438 24. Pichi-Sermolli REG. Historical review of the higher classification of the Filicopsida. In:  
439 Jermy AC, Crabb JA, Thomas BA, editors. *Phylogeny and classification of the ferns*.  
440 London: Bot J Linn Soc. 1973. p.11-40.
- 441 25. Smith AR. Non-molecular phylogenetic hypotheses for ferns. *Am Fern J*. 1995;85(4):104-  
442 22.
- 443 26. Smith AR, Pryer KM, Schuettpelz E, Korall P, Schneider H, Wolf PG. A classification for  
444 extant ferns. *Taxon*. 2006;55:705-31.
- 445 27. Raw reads. <https://www.ncbi.nlm.nih.gov/bioproject/?term=PRJNA281136>. Accessed 5  
446 July 2017.
- 447 28. Transcriptome datasets. <https://figshare.com/s/0f773861b6813f97ff63>. Accessed 5 July  
448 2017.
- 449 29. Phytozone. <http://phytozome.jgi.doe.gov/>. Accessed 5 July 2017.
- 450 30. Alignments. Available from: <https://figshare.com/s/f835735cb66911ff1ffd>. Accessed 5  
451 July 2017.
- 452 31. Datasets of coalescent-based species tree. Available from:  
453 <https://figshare.com/s/e5e70c2fd3990e5176d8>. Accessed 5 July 2017.
- 454 32. Datasets of concatenation based phylogenetic tree. Available from:  
455 <https://figshare.com/s/8af236b660f61078e40b>. Accessed 5 July  
456 2017.

- 1  
2  
3  
4  
5  
6  
7  
8  
9  
10  
11  
12  
13  
14  
15  
16  
17  
18  
19  
20  
21  
22  
23  
24  
25  
26  
27  
28  
29  
30  
31  
32  
33  
34  
35  
36  
37  
38  
39  
40  
41  
42  
43  
44  
45  
46  
47  
48  
49  
50  
51  
52  
53  
54  
55  
56  
57  
58  
59  
60  
61  
62  
63  
64  
65
- 457 33 Kuo LY, Li FW, Chiu WL, Wang CN. First insights into fern matK phylogeny. *Mol Phylogenet Evol.* 2011; 59: 556-66.
- 458
- 459 34. Schneider H. Evolutionary morphology of ferns (monilophytes). *Annu Plant Rev.*  
460 2013;45:115-40.
- 461 35. Christenhusz MJM, Chase M. Trends and concepts in fern classification. *Ann Bot.*  
462 2014;113:571-94.
- 463 36. Schuettpelz E, Pryer KM. Fern phylogeny inferred from 400 leptosporangiate species and  
464 three plastid genes. *Taxon.* 2007;56:1037-50.
- 465 37. Bierhorst DW. *Morphology of vascular plants.* New York: Macmillan; 1971.
- 466 38. Schuettpelz E, Schneider H, Huiet L, Windham MD, Pryer KM. A molecular phylogeny of  
467 the fern family Pteridaceae: Assessing overall relationships and the affinities of previously  
468 unsampled genera. *Mol Phylogenet Evol.* 2007;44:1172-85.
- 469 39. Rothfels CJ, Sundue MA, Kuo L-Y, Larsson A, Kato M, Schuettpelz E, et al. A revised  
470 family-level classification for eupolypod II ferns (Polypodiidae: Polypodiales). *Taxon.*  
471 2012;61:515-33.
- 472 40. Mickel JT. The classification and phylogenetic position of the Dennstadieaceae. In Jeremy  
473 AC, Crabbe JA, Thomas BA, editors. *The phylogeny and classification of the ferns.*  
474 London: Academic Press for The Linnean Society of London. 1973. p. 135-44.
- 475 41. Taylor TN, Taylor EL, Krings M. *Paleobotany: The biology and evolution of fossil plants.*  
476 2nd ed. San Diego: Academic Press. 2009. p. 1141
- 477 42. Scythe. <https://github.com/ucdavis-bioinformatics/scythe>. Accessed 5 July 2017.
- 478 43. Cox MP, Peterson DA, Biggs PJ. SolexaQA: At-a-glance quality assessment of Illumina  
479 second-generation sequencing data. *BMC Bioinformatics.* 2010. doi:10.1186/1471-2105-  
480 11-485.
- 481 44. Grabherr MG, Haas BJ, Yassour M, Levin JZ, Thompson DA, Amit I, et al. Full-length  
482 transcriptome assembly from RNA-Seq data without a reference genome. *Nat Biotechnol.*  
483 2011;29:644-U130.
- 484 45. van Dongen S. A cluster algorithm for graphs. Technical Report INS-R0010, National  
485 Research Institute for Mathematics and Computer Science in the Netherlands. 2000.  
486 [http://micans.org/mcl/index.html?sec\\_thesisetc](http://micans.org/mcl/index.html?sec_thesisetc). Accessed 5 July 2017.
- 487 46. Hejnal A, Obst M, Stamatakis A, Ott M, Rouse GW, Edgecombe GD, et al. Assessing the  
488 root of bilaterian animals with scalable phylogenomic methods. *P Roy Soc B-Biol Sci.*  
489 2009;276:4261-70.

- 1  
2  
3  
4  
5  
6  
7  
8  
9  
10  
11  
12  
13  
14  
15  
16  
17  
18  
19  
20  
21  
22  
23  
24  
25  
26  
27  
28  
29  
30  
31  
32  
33  
34  
35  
36  
37  
38  
39  
40  
41  
42  
43  
44  
45  
46  
47  
48  
49  
50  
51  
52  
53  
54  
55  
56  
57  
58  
59  
60  
61  
62  
63  
64  
65
- 490 47. Haas BJ, Papanicolaou A, Yassour M, Grabherr M, Blood PD, Bowden J, et al. De novo  
491 transcript sequence reconstruction from RNA-Seq: reference generation and analysis with  
492 Trinity. *Nat Protoc.* 2013; doi:10.1038/nprot.2013.084.
- 493 48. Katoh K, Standley DM. MAFFT Multiple Sequence Alignment Software Version 7:  
494 Improvements in Performance and Usability. *Mol Biol Evol.* 2013;30:772-80.
- 495 49. Talavera G, Castresana J. Improvement of phylogenies after removing divergent and  
496 ambiguously aligned blocks from protein sequence alignments. *Syst Biol.* 2007;56:564-77.
- 497 50. Stamatakis A. RAxML: a tool for phylogenetic analysis and post-analysis of large  
498 phylogenies. *Bioinformatics.* 2014;30:1312-3.
- 499 51. Dunn CW, Howison M, Zapata F. Agalma: an automated phylogenomics workflow. *BMC*  
500 *Bioinformatics.* 2013;14:330.
- 501 52. Simao FA, Waterhouse RM, Ioannidis P, Kriventseva EV, Zdobnov EM. BUSCO:  
502 assessing genome assembly and annotation completeness with single-copy orthologs.  
503 *Bioinformatics.* 2015;31:3210-2.
- 504 53. BUSCO results. <https://figshare.com/s/bf999173d04b4c311d46>. Accessed 5 July 2017
- 505 54. Mirarab S, Reaz R, Bayzid MS, Zimmermann T, Swenson MS, Warnow T. ASTRAL:  
506 genome-scale coalescent-based species tree estimation. *Bioinformatics.* 2014;30:I541-8.
- 507 55. Seo TK. Calculating bootstrap probabilities of phylogeny using multilocus sequence data.  
508 *Mol Biol Evol.* 2008;25:960-71.
- 509 56. ProtienModelselection.pl. <https://github.com/stamatak/standard-RAxML/>. Accessed 5 July  
510 2017.
- 511 57. Rößler R, Galtier J. First Grammatopteris tree ferns from the Southern Hemisphere – new  
512 insights in the evolution of the Osmundaceae from the Permian of Brazil. *Rev Palaeobot*  
513 *Palynol.* 2002;121:205-30.
- 514 58. dos Reis M, Yang Z. Approximate Likelihood Calculation on a Phylogeny for Bayesian  
515 Estimation of Divergence Times. *Mol Biol Evol.* 2011;28:2161-72.
- 516 59. Maddison WP, Maddison DR. Mesquite: a modular system for evolutionary analysis.  
517 2011. <http://mesquiteproject.org>. Accessed 5 July 2017.
- 518 60. Lewis PO, Olmstead R. A Likelihood Approach to Estimating Phylogeny from Discrete  
519 Morphological Character Data. *Syst Biol.* 2001;50:913-925.

1 521 **Figure legends**

2  
3 522 **Figure 1. Topologies (a-f) adapted from published results [5, 12-14, 26, 33].**

4  
5  
6 523 Branches with support < 75% were shown using dotted lines; and taxa which differ in  
7  
8  
9 524 their phylogeny locations were shown in different colors.

10  
11  
12 525 **Figure 2. A working flow diagram showing the major processes of data**

13  
14  
15 526 **production and analysis in this study.** Three major processes are De novo  
16  
17  
18 527 transcriptome assembly, one-to-one orthologs prediction, and phylogenetic analysis.

19  
20  
21 528 The rectangles represent the main results and the ellipses represent the main  
22  
23  
24 529 methods and analysis.

25  
26  
27 530 **Figure 3. Phylogeny of ferns reconstructed by coalescent-based method using**

28  
29  
30 531 **nucleotide sequence with divergence times calculated.** Support values for the

31  
32  
33 532 main phylogeny (a) calculated from Matrix 1/Matrix 2 are listed as percentages; \*

34  
35  
36 533 indicates 100%/100%. Representative leave(s), sporangium and the corresponding

37  
38  
39 534 lineage are labeled with a same number. Simplified topology (b) shows the main

40  
41  
42 535 linages as in Figure 1. Species in phylogeny (a) and the corresponding lineage in

43  
44  
45 536 topology (b) are shown in a same color.

46  
47  
48 537 **Figure 4. Reconstructed evolutionary history of sporangial annulus in ferns.**

49  
50  
51 538 Sampled species with seven types of sporangial annulus are shown in different

52  
53  
54 539 colours. For each ancient node, percentage of character state of sporangial annulus is

55  
56  
57 540 shown.

58  
59  
60 541



**Table 1. Sequencing and assembly information of the transcriptome data.** The number of ortholog genes used in Matrix 1 and Matrix 2 were shown.

| ID    | Species                               | Clean data (G) | Total reads (clean) | Q30%  | Number of contigs | N50 (bp) | Mean (bp) | Genes in Matrix 1 | Genes in Matrix 2 |
|-------|---------------------------------------|----------------|---------------------|-------|-------------------|----------|-----------|-------------------|-------------------|
| RS1   | <i>Pronephrium simplex</i>            | 4.7            | 38045864            | 91.24 | 151319            | 887      | 581.07    | 2,168             | 1,254             |
| RS10  | <i>Antrophyum callifolium</i>         | 4.0            | 32745384            | 91.76 | 64107             | 1819     | 998.73    | 2,226             | 1,305             |
| RS101 | <i>Oleandra musifolia</i>             | 4.5            | 36487068            | 91.45 | 37075             | 1493     | 919.3     | 2,093             | 1,248             |
| RS103 | <i>Woodsia polystichoides</i>         | 3.9            | 31465870            | 90.91 | 47812             | 1348     | 811.3     | 2,287             | 1,310             |
| RS107 | <i>Equisetum diffusum</i>             | 4.4            | 35693238            | 90.21 | 88932             | 1154     | 655.64    | 1,811             | 1,254             |
| RS108 | <i>Oreogrammitis dorsipila</i>        | 4.6            | 37037324            | 90.57 | 266540            | 591      | 485.1     | 2,141             | 1,273             |
| RS11  | <i>Vandenboschia striata</i>          | 4.8            | 38639790            | 90.3  | 261724            | 460      | 422.76    | 1,959             | 1,276             |
| RS111 | <i>Pleurosoriopsis makinoi</i>        | 4.8            | 38983796            | 90.13 | 98187             | 1145     | 632.29    | 2,182             | 1,277             |
| RS112 | <i>Azolla pinnata subsp. asiatica</i> | 4.4            | 35735206            | 90.57 | 78295             | 1348     | 777.92    | 1,418             | 839               |
| RS114 | <i>Taenitis blechnoides</i>           | 4.1            | 32898682            | 90.98 | 70495             | 1262     | 711.3     | 2,186             | 1,278             |
| RS115 | <i>Gymnogrammitis dareiformis</i>     | 3.9            | 31630988            | 89.81 | 119483            | 569      | 449.38    | 1,996             | 1,220             |
| RS116 | <i>Schizaea dichotoma</i>             | 4.5            | 36668734            | 89.6  | 67422             | 1350     | 826.92    | 2,035             | 1,285             |
| RS119 | <i>Botrychium japonicum</i>           | 4.8            | 38603000            | 90.28 | 85236             | 1477     | 846.97    | 1,866             | 1,283             |
| RS122 | <i>Goniophlebium niponicum</i>        | 4.8            | 38786214            | 90.82 | 54152             | 1663     | 951.92    | 2,279             | 1,300             |
| RS123 | <i>Arthropteris palisotii</i>         | 4.4            | 35646740            | 91    | 50700             | 1454     | 891.67    | 2,286             | 1,311             |
| RS124 | <i>Matteuccia struthiopteris</i>      | 4.2            | 34080998            | 90.44 | 57514             | 1345     | 776.52    | 2,290             | 1,313             |
| RS127 | <i>Salvinia natans</i>                | 4.2            | 33780056            | 91.17 | 79393             | 1379     | 767.14    | 1,905             | 1,173             |
| RS128 | <i>Woodwardia prolifera</i>           | 5.1            | 40967322            | 91.63 | 69931             | 1557     | 859.72    | 2,328             | 1,328             |
| RS14  | <i>Diplazium viridescens</i>          | 4.0            | 32320416            | 90.46 | 88236             | 1434     | 780.87    | 2,269             | 1,310             |
| RS16  | <i>Bolbitis appendiculata</i>         | 4.7            | 37503336            | 91.66 | 201426            | 802      | 556.39    | 2,226             | 1,288             |
| RS17  | <i>Dryopteris pseudocaenopteris</i>   | 4.1            | 33136196            | 91.23 | 102751            | 723      | 514.92    | 2,236             | 1,298             |
| RS18  | <i>Dicranopteris pedata</i>           | 4.2            | 33942120            | 92.04 | 74011             | 1193     | 684.09    | 2,031             | 1,304             |
| RS19  | <i>Haplopteris amboinensis</i>        | 4.2            | 42772168            | 94.17 | 47603             | 1713     | 1041.8    | 2,249             | 1,307             |
| RS21  | <i>Psilotum nudum</i>                 | 8.5            | 85199034            | 93.6  | 66212             | 1739     | 927.19    | 1,741             | 1,223             |
| RS24  | <i>Cyclopeltis crenata</i>            | 4.6            | 37158058            | 91.5  | 29668             | 600      | 491.82    | 2,146             | 1,279             |
| RS25  | <i>Asplenium formosae</i>             | 4.6            | 46629754            | 93.5  | 73318             | 1722     | 989.84    | 2,273             | 1,312             |
| RS27  | <i>Lomariopsis spectabilis</i>        | 4.1            | 33233594            | 91.77 | 98030             | 1466     | 750.42    | 2,225             | 1,304             |
| RS28  | <i>Cheiropleuria bicuspis</i>         | 5.1            | 41617294            | 91.35 | 99411             | 1435     | 832.82    | 2,022             | 1,295             |
| RS31  | <i>Plagiogyria japonica</i>           | 5.7            | 46472760            | 91.92 | 89532             | 1258     | 733.9     | 2,036             | 1,222             |
| RS34  | <i>Alsophila podophylla</i>           | 4.9            | 48768608            | 93.43 | 66254             | 1580     | 904.62    | 2,195             | 1,289             |
| RS35  | <i>Histiopteris incisa</i>            | 4.3            | 43115390            | 93.81 | 61231             | 1749     | 985.03    | 2,319             | 1,316             |
| RS36  | <i>Pteris vittata</i>                 | 4.1            | 41212858            | 94.37 | 76666             | 1868     | 1021.13   | 2,296             | 1,312             |
| RS37  | <i>Cibotium barometz</i>              | 4.1            | 33263550            | 91.92 | 85555             | 1612     | 891.87    | 1,790             | 1,099             |
| RS38  | <i>Osmunda japonica</i>               | 4.1            | 33485274            | 92.05 | 58612             | 1730     | 901.28    | 1,732             | 1,159             |
| RS39  | <i>Loxogramme chinensis</i>           | 3.9            | 31392952            | 92.16 | 84796             | 1065     | 651.88    | 2,240             | 1,305             |
| RS4   | <i>Microlepia hookeriana</i>          | 4.0            | 40561422            | 94.49 | 95951             | 1610     | 874.06    | 2,262             | 1,301             |
| RS41  | <i>Pteridium aquilinum</i>            | 4.6            | 46157134            | 93.51 | 55615             | 1742     | 960.37    | 2,321             | 1,316             |

|      |                                    |     |            |       |        |      |         |       |       |
|------|------------------------------------|-----|------------|-------|--------|------|---------|-------|-------|
| RS42 | <i>Hypolepis punctata</i>          | 4.4 | 43828154   | 93.56 | 59717  | 1371 | 833.68  | 2,277 | 1,308 |
| RS43 | <i>Dicksonia antarctica</i>        | 3.9 | 31210608   | 91.69 | 56494  | 1533 | 902.96  | 2,045 | 1,213 |
| RS45 | <i>Rhachidosorus mesosorus</i>     | 4.4 | 35348994   | 91.98 | 80069  | 1541 | 835.92  | 2,300 | 1,315 |
| RS46 | <i>Drynaria bonii</i>              | 4.5 | 36017548   | 92.02 | 68132  | 1077 | 643.93  | 2,176 | 1,279 |
| RS47 | <i>Platycterium bifurcatum</i>     | 4.1 | 33209740   | 91.62 | 40456  | 1097 | 694.56  | 2,148 | 1,283 |
| RS48 | <i>Angiopteris fokiensis</i>       | 4.4 | 35120302   | 91.12 | 57637  | 1629 | 932.57  | 1,917 | 1,306 |
| RS5  | <i>Diplaziopsis brunoniana</i>     | 4.3 | 34698846   | 91.35 | 70184  | 822  | 541.31  | 2,040 | 1,234 |
| RS50 | <i>Dennstaedtia pilosella</i>      | 4.5 | 45618446   | 93.63 | 84813  | 1582 | 831.56  | 2,308 | 1,313 |
| RS51 | <i>Monachosorum henryi</i>         | 4.1 | 41658504   | 93.42 | 87832  | 1465 | 803.17  | 2,255 | 1,288 |
| RS52 | <i>Acystopteris japonica</i>       | 5.5 | 44662146   | 91.15 | 57118  | 1507 | 873.59  | 1,222 | 677   |
| RS53 | <i>Monachosorum maximowiczii</i>   | 4.8 | 48497004   | 93.58 | 101448 | 1817 | 899.54  | 2,257 | 1,294 |
| RS54 | <i>Dennstaedtia scabra</i>         | 5.1 | 51360716   | 93.47 | 92158  | 1565 | 845.44  | 1,818 | 1,056 |
| RS56 | <i>Arachniodes nigrospinosa</i>    | 5.1 | 50929362   | 94.47 | 57168  | 1623 | 916.1   | 2,332 | 1,319 |
| RS69 | <i>Cheilanthes chusana</i>         | 5.2 | 51851066   | 94.18 | 49449  | 1727 | 1012.63 | 2,317 | 1,324 |
| RS7  | <i>Elaphoglossum mcclurei</i>      | 4.1 | 32800248   | 92.31 | 57330  | 1398 | 846.79  | 2,267 | 1,299 |
| RS70 | <i>Lomagramma matthewii</i>        | 4.4 | 35218876   | 91.21 | 65170  | 1748 | 947.18  | 2,258 | 1,307 |
| RS71 | <i>Osmolindsaea odorata</i>        | 4.6 | 46808646   | 94.13 | 113778 | 1521 | 845.96  | 2,257 | 1,312 |
| RS72 | <i>Aleuritopteris chrysophylla</i> | 4.8 | 47955674   | 94.18 | 61637  | 1669 | 929.63  | 2,307 | 1,322 |
| RS77 | <i>Marsilea quadrifolia</i>        | 4.3 | 34724432   | 91.76 | 65227  | 1607 | 930.31  | 2,188 | 1,299 |
| RS8  | <i>Humata repens</i>               | 4.5 | 36606746   | 91.17 | 68932  | 1267 | 690.35  | 2,264 | 1,315 |
| RS81 | <i>Tectaria subpedata</i>          | 4.2 | 42539482   | 94.43 | 57384  | 1326 | 797.83  | 2,128 | 1,242 |
| RS84 | <i>Ophioglossum vulgatum</i>       | 4.4 | 35637330   | 91.77 | 71821  | 1226 | 741.62  | 1,631 | 1,179 |
| RS85 | <i>Nephrolepis cordifolia</i>      | 5.0 | 40063236   | 90.81 | 55207  | 1530 | 842.63  | 2,302 | 1,319 |
| RS86 | <i>Microlepia platyphylla</i>      | 4.6 | 46324294   | 94    | 74956  | 1763 | 945.87  | 2,267 | 1,295 |
| RS88 | <i>Lygodium flexuosum</i>          | 4.2 | 34098316   | 91.44 | 66751  | 1514 | 867.82  | 2,064 | 1,296 |
| RS89 | <i>Hypodematium crenatum</i>       | 4.1 | 32711798   | 91.58 | 52813  | 1416 | 852.57  | 2,298 | 1,319 |
| RS90 | <i>Acrostichum aureum</i>          | 5.4 | 43422574   | 90.69 | 46189  | 1729 | 1043.2  | 2,303 | 1,319 |
| RS91 | <i>Adiantum caudatum</i>           | 5.1 | 51062204   | 94.23 | 51145  | 1575 | 950.49  | 2,323 | 1,327 |
| RS92 | <i>Parahemionitis cordata</i>      | 4.1 | 33309450   | 91.72 | 47508  | 1456 | 894.42  | 2,306 | 1,317 |
| RS93 | <i>Microlepia speluncae</i>        | 4.4 | 44124842   | 94.55 | 94980  | 1720 | 917.59  | 2,292 | 1,308 |
| RS97 | <i>Stenochlaena palustris</i>      | 4.7 | 37887642   | 91.81 | 58416  | 1655 | 945.83  | 2,300 | 1,316 |
| RS98 | <i>Ceratopteris thalictroides</i>  | 3.9 | 31741082.0 | 91.4  | 74728  | 1610 | 912.26  | 2,231 | 1,296 |

**Table 2. Inconsistent topologies using different methods and sequences.**

| Site | Coalescent-based method       |                               | Concatenation-based method   |                              |
|------|-------------------------------|-------------------------------|------------------------------|------------------------------|
|      | nucleotide                    | amino-acid                    | nucleotide                   | amino-acid                   |
| A    | <b>(Anfo,(Pnu,(Ovu,Bja)))</b> | <b>(Anfo,(Pnu,(Ovu,Bja)))</b> | ((Pnu,(Ovu,Bja)),(Anfo,#))   | ((Pnu,(Ovu,Bja)),(Anfo,#))   |
| B    | <b>(Cbi,(Dpe,Vst))</b>        | <b>(Cbi,(Dpe,Vst))</b>        | <b>(Cbi,(Dpe,Vst))</b>       | ((Dpe,Vst),(Cbi,#))          |
| C    | <b>(Asfo,(Aja,(Dbr,#)))</b>   | <b>(Asfo,(Aja,(Dbr,#)))</b>   | <b>(Asfo,(Aja,(Dbr,#)))</b>  | (Asfo,((Aja,Dbr),#))         |
| D    | <b>(Dvi,(Mst,(Spa,Wpr)))</b>  | ((Dvi,Mst),(Spa,Wpr))         | <b>(Dvi,(Mst,(Spa,Wpr)))</b> | <b>(Dvi,(Mst,(Spa,Wpr)))</b> |
| E    | <b>(Bap,(Emc,Lma))</b>        | (Emc,(Bap,Lma))               | <b>(Bap,(Emc,Lma))</b>       | (Emc,(Bap,Lma))              |
| F    | <b>(Nco,((Tsu,Apa),#))</b>    | (Nco,(Tsu,(Apa,#)))           | <b>(Nco,((Tsu,Apa),#))</b>   | <b>(Nco,((Tsu,Apa),#))</b>   |

(A) Anfo: *Angiopteris fokiensis*, Pnu: *Psilotum nudum*, Ovu: *Ophioglossum vulgatum*, Bja: *Botrychium japonicum*; (B) Cbi: *Cheiropleuria bicuspis*, Dpe: *Dicranopteris pedata*, Vst: *Vandenboschia striata*; (C) Asfo: *Asplenium formosae*, Aja: *Acystopteris japonica*, Dbr: *Diplaziopsis brunoniana*; (D) Dvi: *Diplazium viridescens*, Mst: *Matteuccia struthiopteris*, Spa: *Stenochlaena palustris*, Wpr: *Woodwardia prolifera*; (E) Bap: *Bolbitis appendiculata*, Emc: *Elaphoglossum mcclurei*, Lma: *Lomagramma matthewii*; (F) Nco: *Nephrolepis cordifolia*, Tsu: *Tectaria subpedata*, Apa: *Arthropteris palisotii*. # indicates other sampled species within this lineage. Topologies consistent with the one yielded from coalescent-based method and nucleotide sequences are shown in bold.

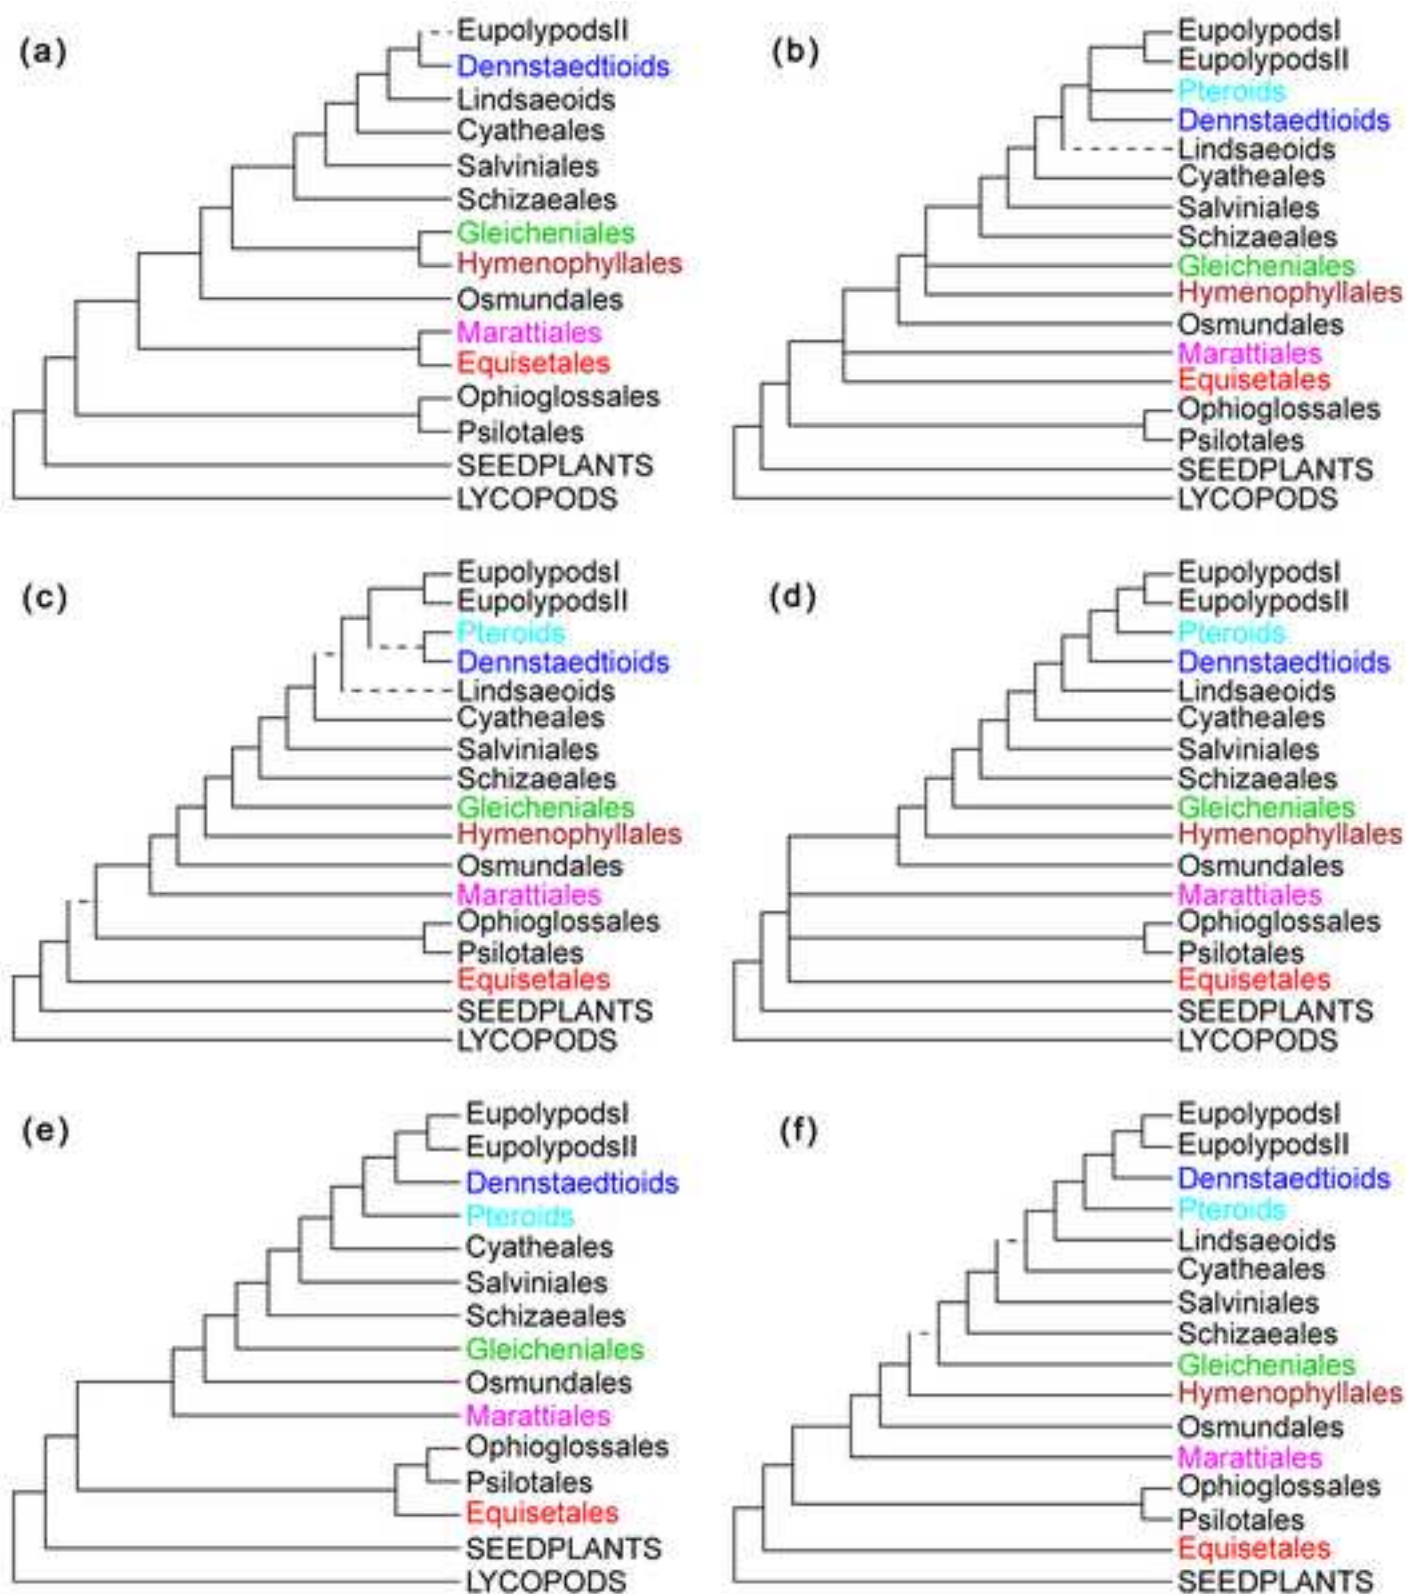

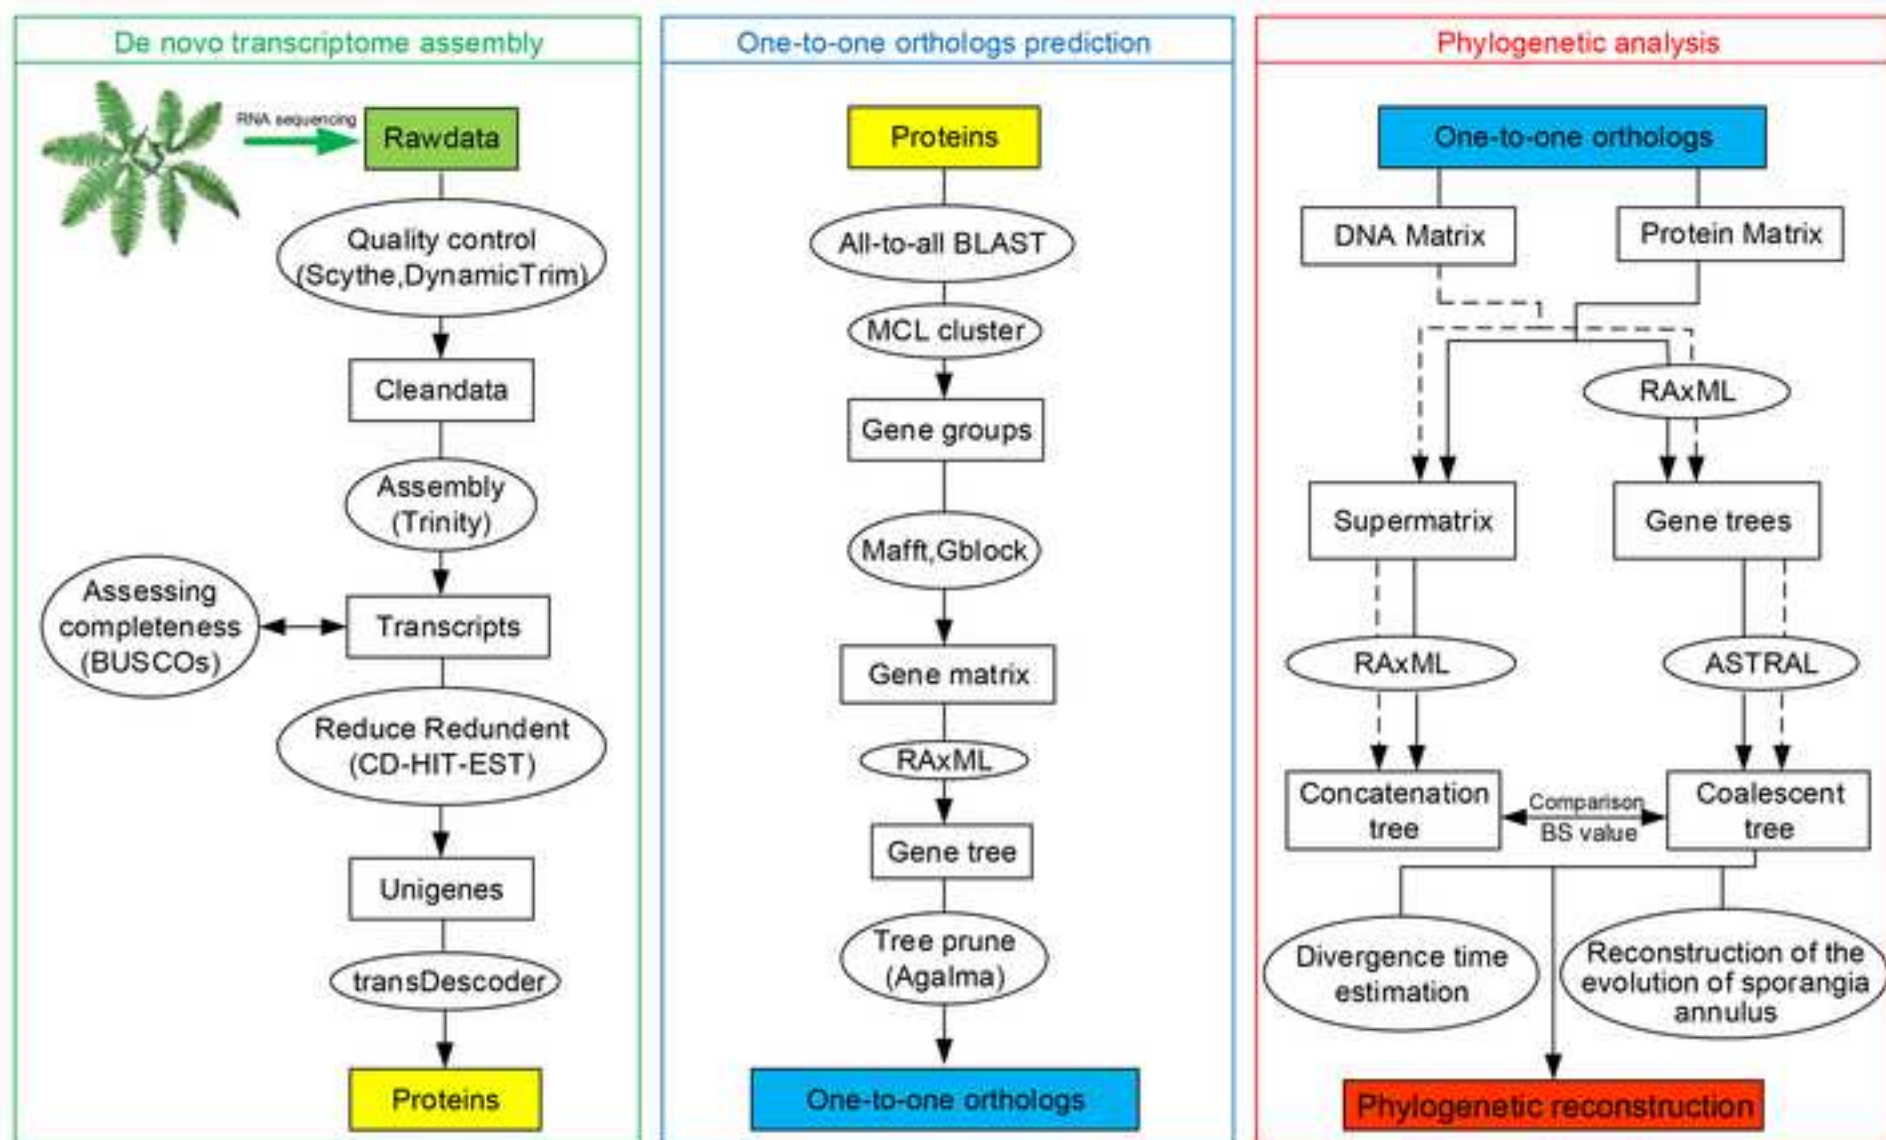



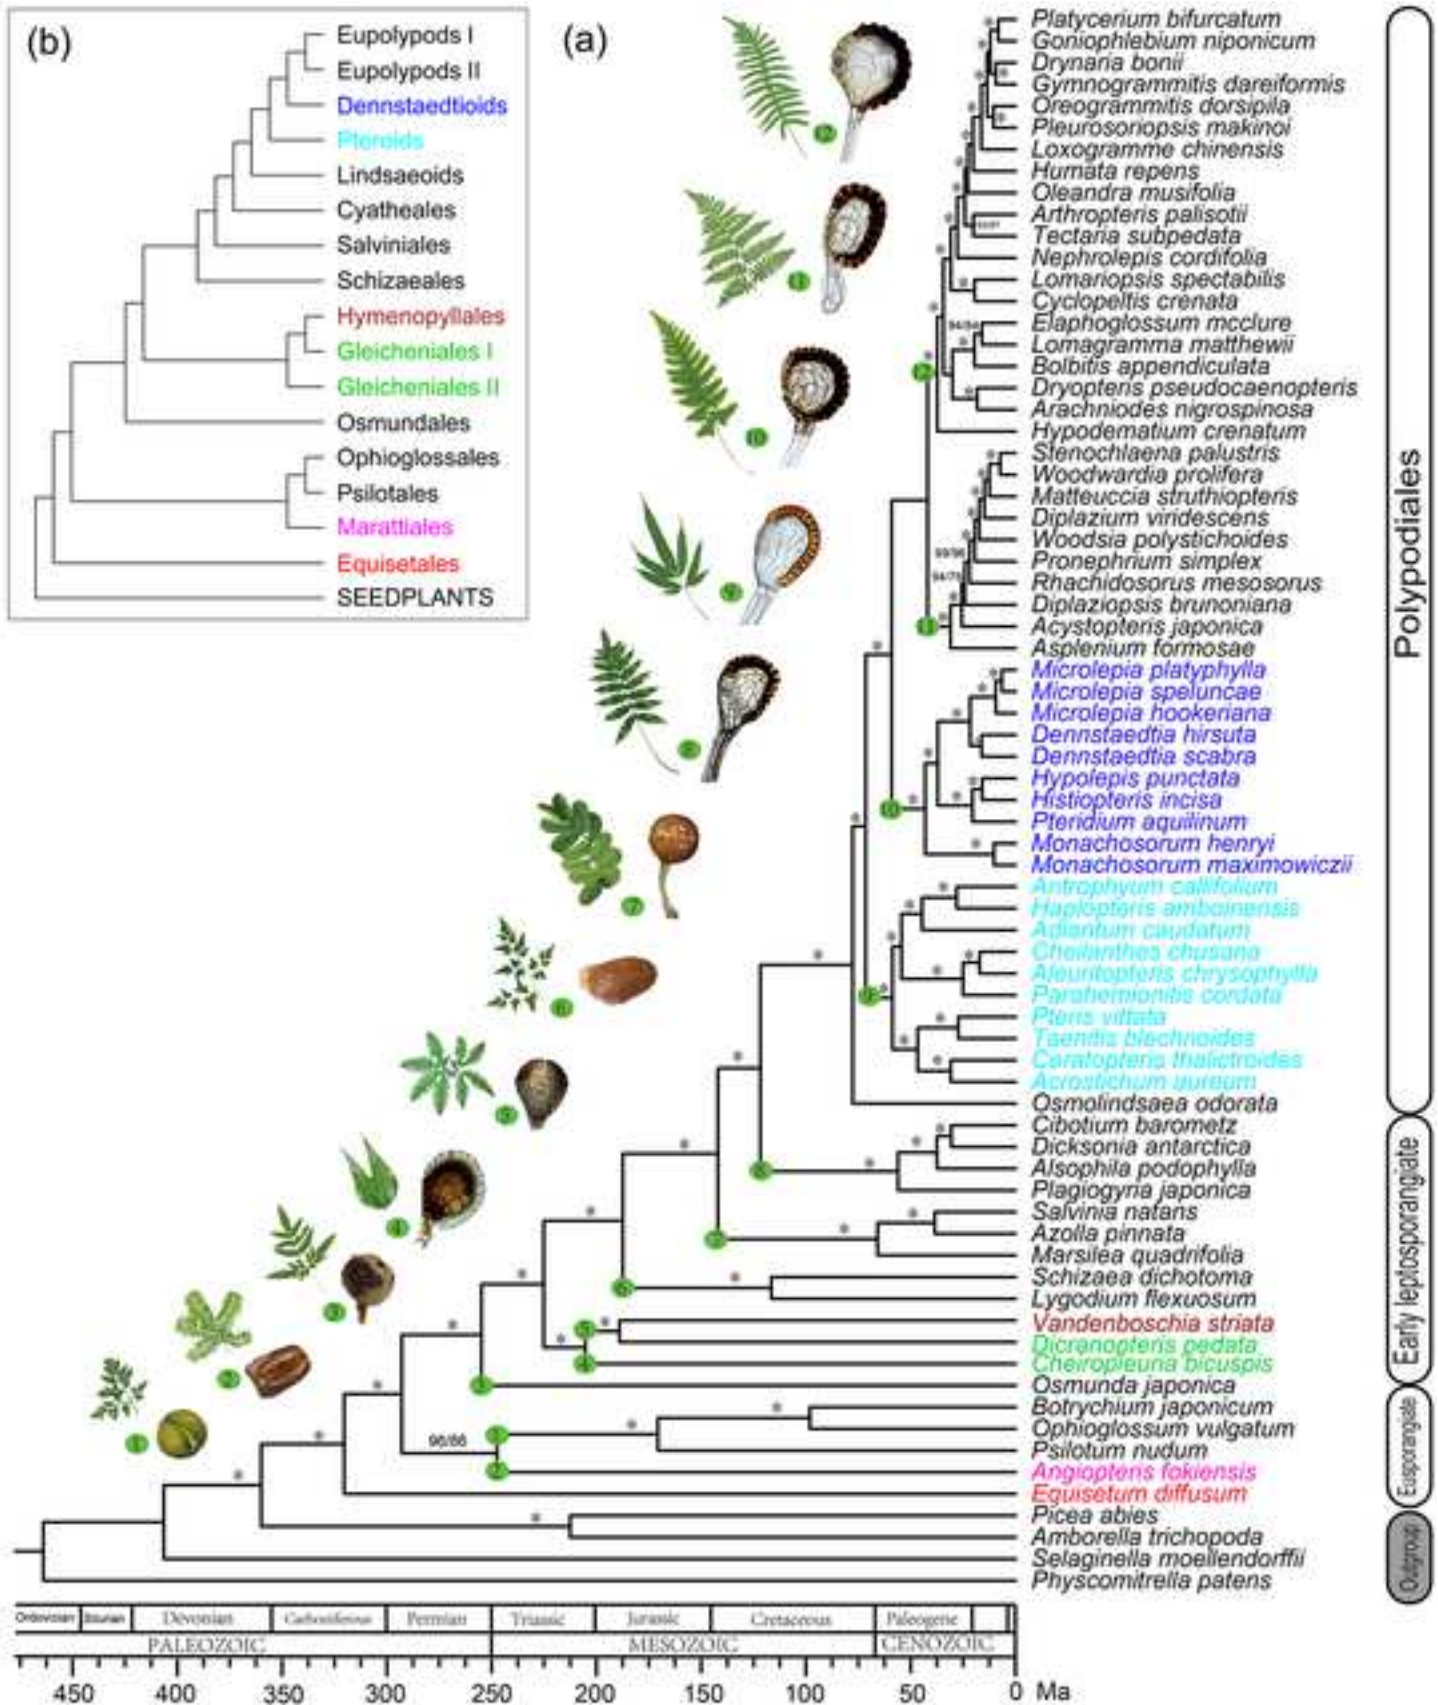



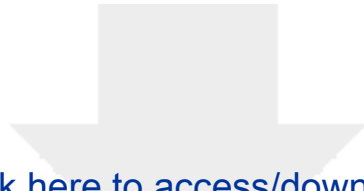

Click here to access/download  
**Supplementary Material**  
Supplementary information.docx

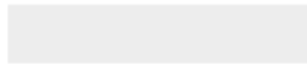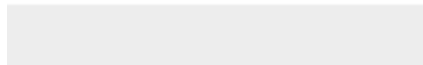



Yue-Hong Yan, Professor  
Shanghai Chenshan Plant Science Research Center,  
Chinese Academy of Sciences & Shanghai Chenshan Botanical Garden  
3888 Chenhua Road, Shanghai 201602, China  
Tel: +86-21-37792288-903; Fax: +86-21-67657811; email: yhyan@sibs.ac.cn  
Sep. 1st, 2017

Dear Editor for GigaScience:

We have revised a manuscript entitled “**Large scale phylogenomic analysis resolves a backbone phylogeny in ferns**” (formerly manuscript number: GIGA-D-17-00009) for your consideration to be published in **GigaScience**. The materials in the manuscript have not been published, nor are under consideration for publication elsewhere.

All the suggestions and comments by the reviewers have been carefully considered and mostly adopted in our revised manuscript. The major revisions includes:

1. We re-interpreted the evolutionary history of sporangial annulus in ferns rigidly according to the results of reconstructed evolutionary history as in Figure 4, and the “ladderized thinking” are carefully avoided ([Page 11, line 220-231](#));
2. We made a careful discussion about the inconsistencies between the results yielded from concatenation-based and coalescent-based methods using DNA and Protein sequences ([Page8, Line 168 to Line171](#)).

Thank you very much for handling our manuscript. I am looking forward to hearing your decision soon.

Sincerely yours,  
Yue-Hong Yan
